# Supplementary material
Source: publisher figshare collection journal article supplement (https://tandf.figshare.com/articles/dataset/_/19169919)
Supplement: Supplementary file 1 [file 1]

## Sheet: S3. Old data, standard analysis
Table S3. CpGs associated with childhood adversity or prenatal smoking in the SLCMA of old data in the original analysis
CpG	Adversity	Model	Timing	R2	P.value	FDR	%DNAm change (old)	%DNAm change (new)	Method	Covariates	Data
cg00040008	Physical/sexual abuse	81m	middle	0.0282344	1.48682e-07	0.00895812	0.00491828	0.0064829	covTest	Original	Old
cg00191625	Physical/sexual abuse	57m	early	0.0222103	5.05301e-06	0.0463463	0.0290061	0.0140683	covTest	Original	Old
cg00258976	Physical/sexual abuse	42m	early	0.0211823	5.65432e-06	0.0463924	-0.0026018	-0.00107936	covTest	Original	Old
cg00460575	Physical/sexual abuse	81m	middle	0.0234173	4.26935e-06	0.0463463	-0.0260522	-0.0207251	covTest	Original	Old
cg00714874	Physical/sexual abuse	57m	early	0.0240073	1.62949e-06	0.0377672	0.0505817	0.0148891	covTest	Original	Old
cg01370449	Physical/sexual abuse	30m	very early	0.0321821	3.09624e-08	0.0045438	0.0613683	0.0708137	covTest	Original	Old
cg01382936	Physical/sexual abuse	57m	early	0.0251397	4.395e-06	0.0463463	0.00253653	0.0020455	covTest	Original	Old
cg02093833	Physical/sexual abuse	57m	early	0.022414	7.12412e-06	0.0496649	-0.0310626	-0.0298751	covTest	Original	Old
cg02106682	Physical/sexual abuse	30m	very early	0.0310547	5.52467e-08	0.00608068	0.0223119	0.039285	covTest	Original	Old
cg02182592	Physical/sexual abuse	57m	early	0.0230965	7.23321e-06	0.0496649	0.0779578	0.0182505	covTest	Original	Old
cg02622209	Physical/sexual abuse	18m	very early	0.025198	1.83922e-06	0.0377672	-0.0145295	-0.00577755	covTest	Original	Old
cg02643667	Physical/sexual abuse	69m	middle	0.0232204	3.44229e-06	0.0463463	-0.00971287	-0.006536	covTest	Original	Old
cg02910650	Physical/sexual abuse	81m	middle	0.0231745	6.14419e-06	0.046463	-0.00928329	-0.0109909	covTest	Original	Old
cg03084214	Physical/sexual abuse	42m	early	0.0226788	4.96705e-06	0.0463463	-0.0406628	-0.0404611	covTest	Original	Old
cg04030659	Physical/sexual abuse	57m	early	0.0211932	2.57295e-06	0.0412533	-0.061519	-0.0233829	covTest	Original	Old
cg04285033	Physical/sexual abuse	42m	early	0.0236272	7.44538e-06	0.0496649	0.00825596	0.00298751	covTest	Original	Old
cg04478905	Physical/sexual abuse	30m	very early	0.0203456	5.27294e-06	0.0463924	0.0312125	0.0167911	covTest	Original	Old
cg05072819	Physical/sexual abuse	69m	middle	0.0323967	1.97202e-08	0.00434097	0.00828274	0.00265262	covTest	Original	Old
cg05449607	Physical/sexual abuse	42m	early	0.0232354	4.94988e-06	0.0463463	0.00765274	0.0317581	covTest	Original	Old
cg05682581	Physical/sexual abuse	18m	very early	0.0222276	3.64177e-06	0.0463463	0.0270853	0.0224861	covTest	Original	Old
cg05747812	Physical/sexual abuse	57m	early	0.0202332	6.43518e-06	0.046463	0.0205333	0.0146919	covTest	Original	Old
cg05825855	Physical/sexual abuse	30m	very early	0.0233623	1.12992e-06	0.0355325	-0.0186043	-0.0153437	covTest	Original	Old
cg05936516	Physical/sexual abuse	81m	middle	0.031777	1.36022e-07	0.00895812	0.0203144	0.0395534	covTest	Original	Old
cg05971010	Physical/sexual abuse	57m	early	0.0232519	4.57095e-06	0.0463463	0.0245719	0.0136456	covTest	Original	Old
cg06172859	Physical/sexual abuse	57m	early	0.0257304	2.90474e-06	0.0440976	-0.0207445	-0.0103389	covTest	Original	Old
cg06430102	Physical/sexual abuse	30m	very early	0.0374944	2.2564e-09	0.000993396	-0.0357639	-0.0290711	covTest	Original	Old
cg06606539	Physical/sexual abuse	42m	early	0.0239282	6.00642e-06	0.0463924	-0.0783744	-0.0292737	covTest	Original	Old
cg06778159	Physical/sexual abuse	18m	very early	0.0192078	5.98568e-06	0.0463924	0.0231192	0.012667	covTest	Original	Old
cg08381596	Physical/sexual abuse	30m	very early	0.0224655	5.62255e-06	0.0463924	-0.0655282	-0.0161087	covTest	Original	Old
cg08603735	Physical/sexual abuse	69m	middle	0.023939	3.56282e-06	0.0463463	-0.0679029	-0.0323099	covTest	Original	Old
cg08783584	Physical/sexual abuse	57m	early	0.0270997	1.6278e-07	0.00895812	-0.0350595	-0.0192989	covTest	Original	Old
cg10583931	Physical/sexual abuse	30m	very early	0.025816	2.88248e-07	0.0126903	0.00611008	0.00932511	covTest	Original	Old
cg10696876	Physical/sexual abuse	81m	middle	0.0218167	5.99003e-06	0.0463924	0.0296783	0.00303262	covTest	Original	Old
cg12082681	Physical/sexual abuse	30m	very early	0.027025	5.75985e-07	0.0195063	-0.0181732	-0.017714	covTest	Original	Old
cg12144100	Physical/sexual abuse	57m	early	0.0273651	1.38075e-06	0.0377672	0.0322784	0.0278288	covTest	Original	Old
cg12259024	Physical/sexual abuse	57m	early	0.0217471	2.62368e-06	0.0412533	0.0218651	0.0136383	covTest	Original	Old
cg12347444	Physical/sexual abuse	42m	early	0.0236549	3.86041e-06	0.0463463	-0.00809111	-0.0155535	covTest	Original	Old
cg13258831	Physical/sexual abuse	18m	very early	0.021984	5.69576e-06	0.0463924	-0.0315948	-0.0251012	covTest	Original	Old
cg13352495	Physical/sexual abuse	81m	middle	0.0213702	6.40809e-06	0.046463	0.00507487	0.0100075	covTest	Original	Old
cg13817046	Physical/sexual abuse	57m	early	0.0246581	1.49688e-06	0.0377672	-0.0620294	-0.0611737	covTest	Original	Old
cg14753691	Physical/sexual abuse	30m	very early	0.0227371	2.28202e-06	0.0386413	-0.0257003	-0.0205327	covTest	Original	Old
cg16422547	Physical/sexual abuse	81m	middle	0.0237651	2.06109e-06	0.0378087	-0.0212635	-0.0143063	covTest	Original	Old
cg16691821	Physical/sexual abuse	42m	early	0.0262134	4.19128e-07	0.015377	0.0222108	0.0155593	covTest	Original	Old
cg17694719	Physical/sexual abuse	accumulation	accumulation	0.0232833	4.75566e-06	0.0463463	NA	NA	covTest	Original	Old
cg19047077	Physical/sexual abuse	57m	early	0.0238663	1.97304e-06	0.0377672	-0.0108369	-0.0076008	covTest	Original	Old
cg19170021	Physical/sexual abuse	57m	early	0.0281533	7.84473e-08	0.00690739	0.0572279	0.0176611	covTest	Original	Old
cg19178081	Physical/sexual abuse	57m	early	0.0240293	6.4377e-06	0.046463	0.0427788	0.0179271	covTest	Original	Old
cg19732605	Physical/sexual abuse	18m	very early	0.0234866	3.62664e-06	0.0463463	0.00479424	0.000521069	covTest	Original	Old
cg20369299	Physical/sexual abuse	57m	early	0.0217353	7.03071e-06	0.0496649	-0.0825441	-0.0746155	covTest	Original	Old
cg20585500	Physical/sexual abuse	57m	early	0.0218552	4.44612e-06	0.0463463	-0.0102476	-0.00890006	covTest	Original	Old
cg20677982	Physical/sexual abuse	42m	early	0.02804	1.87346e-07	0.0091645	0.0109519	0.00623881	covTest	Original	Old
cg21655444	Physical/sexual abuse	57m	early	0.0228504	7.3859e-06	0.0496649	-0.00942855	-0.00456691	covTest	Original	Old
cg21911851	Physical/sexual abuse	57m	early	0.0275133	2.24091e-06	0.0386413	-0.0383338	-0.0178781	covTest	Original	Old
cg21972156	Physical/sexual abuse	18m	very early	0.0245452	4.34493e-06	0.0463463	0.0016206	0.000197352	covTest	Original	Old
cg22247136	Physical/sexual abuse	57m	early	0.0263897	3.27009e-07	0.013088	-0.0212947	-0.0153324	covTest	Original	Old
cg23077364	Physical/sexual abuse	18m	very early	0.0212134	5.69666e-06	0.0463924	-0.0162553	-0.00600848	covTest	Original	Old
cg23114746	Physical/sexual abuse	57m	early	0.0228365	3.30048e-06	0.0463463	-0.00164823	-0.000297936	covTest	Original	Old
cg23345930	Physical/sexual abuse	81m	middle	0.024404	1.93979e-06	0.0377672	-0.00634874	-0.00391752	covTest	Original	Old
cg23376012	Physical/sexual abuse	57m	early	0.0197944	4.794e-06	0.0463463	0.0188433	0.0140151	covTest	Original	Old
cg23930923	Physical/sexual abuse	42m	early	0.0249399	4.58847e-06	0.0463463	0.0209063	0.0649776	covTest	Original	Old
cg25428929	Physical/sexual abuse	57m	early	0.02077	4.20696e-06	0.0463463	-0.00351594	-0.00200731	covTest	Original	Old
cg25696949	Physical/sexual abuse	57m	early	0.0238418	1.74265e-06	0.0377672	-0.0142536	-0.00690789	covTest	Original	Old
cg26184028	Physical/sexual abuse	57m	early	0.0213635	4.85972e-06	0.0463463	-0.00651914	-0.0161427	covTest	Original	Old
cg26591149	Physical/sexual abuse	30m	very early	0.0234633	1.71622e-06	0.0377672	-0.0141492	-0.0139801	covTest	Original	Old
cg27477504	Physical/sexual abuse	30m	very early	0.0238111	1.86861e-06	0.0377672	-0.0186957	-0.0118569	covTest	Original	Old
cg27652117	Physical/sexual abuse	42m	early	0.0210921	5.25823e-06	0.0463924	-0.00290896	-0.00150825	covTest	Original	Old
cg00066750	Financial hardship	33m	very early	0.0212787	3.59364e-06	0.0298515	-0.0418745	-0.0167999	covTest	Original	Old
cg00198729	Financial hardship	21m	very early	0.0258367	2.65332e-07	0.00648968	0.0077138	0.00674336	covTest	Original	Old
cg00350441	Financial hardship	61m	early	0.022681	5.29254e-06	0.0359735	0.000439301	0.000285244	covTest	Original	Old
cg00556126	Financial hardship	8m	very early	0.0268311	9.03987e-07	0.0120602	0.00166622	0.00279434	covTest	Original	Old
cg00651709	Financial hardship	8m	very early	0.0220272	5.31116e-06	0.0359735	-0.0048285	-0.00484653	covTest	Original	Old
cg00722300	Financial hardship	7y	middle	0.0283015	1.051e-07	0.00330991	0.000919675	0.0026379	covTest	Original	Old
cg00764065	Financial hardship	21m	very early	0.0235837	3.93281e-06	0.0299043	-0.00488266	-0.00338096	covTest	Original	Old
cg00927494	Financial hardship	7y	middle	0.0266467	1.20488e-06	0.0151559	0.000897599	0.00441024	covTest	Original	Old
cg01036849	Financial hardship	21m	very early	0.0224891	8.19621e-06	0.0474795	-0.00201344	-0.000986288	covTest	Original	Old
cg01202124	Financial hardship	21m	very early	0.0235044	8.19402e-07	0.011933	-0.00198401	-0.00297487	covTest	Original	Old
cg01910231	Financial hardship	21m	very early	0.0295541	3.72606e-07	0.00745647	-0.00112144	-0.00024458	covTest	Original	Old
cg01915822	Financial hardship	33m	very early	0.0226207	5.89671e-06	0.0387473	-0.0174072	-0.00939256	covTest	Original	Old
cg02002619	Financial hardship	33m	very early	0.0302848	1.29003e-07	0.0037863	-0.00500541	-0.00531198	covTest	Original	Old
cg02148975	Financial hardship	8m	very early	0.0296998	9.57604e-08	0.00330991	-0.0192487	-0.0159357	covTest	Original	Old
cg02203311	Financial hardship	7y	middle	0.0245972	1.91896e-06	0.0196473	0.00061931	0.000289451	covTest	Original	Old
cg02695628	Financial hardship	accumulation	accumulation	0.0240618	2.75399e-06	0.0242493	NA	NA	covTest	Original	Old
cg02951558	Financial hardship	recency	recency	0.0248008	8.8169e-06	0.0497455	NA	NA	covTest	Original	Old
cg03237316	Financial hardship	7y	middle	0.0217813	4.82013e-06	0.0342274	0.00453844	0.00455796	covTest	Original	Old
cg03309328	Financial hardship	8m	very early	0.023773	6.94336e-06	0.0429375	0.0223666	0.0208708	covTest	Original	Old
cg03564320	Financial hardship	7y	middle	0.0250376	6.20412e-07	0.0101163	0.0140157	0.0253669	covTest	Original	Old
cg04020138	Financial hardship	7y	middle	0.0314112	5.1029e-08	0.00329606	-0.0161226	-0.00780395	covTest	Original	Old
cg04753475	Financial hardship	7y	middle	0.0329983	7.19835e-08	0.00330991	-0.04796	-0.0265667	covTest	Original	Old
cg05466640	Financial hardship	7y	middle	0.0237415	8.67346e-07	0.011933	0.000553381	0.000616321	covTest	Original	Old
cg05835744	Financial hardship	21m	very early	0.0262109	4.68646e-07	0.00891464	-0.00089482	-0.000209391	covTest	Original	Old
cg06550582	Financial hardship	recency	recency	0.0291127	5.6008e-07	0.00973615	NA	NA	covTest	Original	Old
cg07236001	Financial hardship	7y	middle	0.0232499	1.06576e-06	0.0138002	0.00664013	-0.00477877	covTest	Original	Old
cg07373836	Financial hardship	recency	recency	0.0248374	1.68438e-06	0.0180868	NA	NA	covTest	Original	Old
cg07395969	Financial hardship	8m	very early	0.0212997	8.70358e-06	0.0497455	0.00205802	0.00203947	covTest	Original	Old
cg07470396	Financial hardship	33m	very early	0.0255414	3.86668e-06	0.0299043	-0.0042106	-0.00387967	covTest	Original	Old
cg07696099	Financial hardship	7y	middle	0.0224904	2.54043e-06	0.0232704	-0.0101243	-0.0112699	covTest	Original	Old
cg07919128	Financial hardship	7y	middle	0.0302093	2.1502e-08	0.00315547	0.00789895	0.0106487	covTest	Original	Old
cg08066376	Financial hardship	33m	very early	0.0262478	2.43711e-07	0.0063115	0.0223436	0.0333399	covTest	Original	Old
cg09162949	Financial hardship	21m	very early	0.0291859	4.85969e-07	0.00891464	0.00254376	0.00477654	covTest	Original	Old
cg09580214	Financial hardship	8m	very early	0.0288257	1.05254e-07	0.00330991	-0.0124182	-0.0277382	covTest	Original	Old
cg09665023	Financial hardship	21m	very early	0.0244967	1.38483e-06	0.0165334	-0.00135486	-0.000396546	covTest	Original	Old
cg09753193	Financial hardship	7y	middle	0.022799	1.56566e-06	0.0176742	-0.00624754	-0.00636787	covTest	Original	Old
cg10041232	Financial hardship	recency	recency	0.0268021	1.46671e-06	0.0169929	NA	NA	covTest	Original	Old
cg10075976	Financial hardship	7y	middle	0.0219671	4.61497e-06	0.0333078	0.00581524	0.0174512	covTest	Original	Old
cg10281977	Financial hardship	33m	very early	0.0258122	2.2885e-06	0.0223896	0.00631478	0.00498593	covTest	Original	Old
cg10864433	Financial hardship	8m	very early	0.0224828	3.51413e-06	0.0297523	0.00440862	0.00255042	covTest	Original	Old
cg11151193	Financial hardship	33m	very early	0.0216232	7.39712e-06	0.0446114	-0.00285493	-0.0056039	covTest	Original	Old
cg11743448	Financial hardship	7y	middle	0.0259115	1.73114e-06	0.0181463	-0.00233919	-0.00361556	covTest	Original	Old
cg11950982	Financial hardship	33m	very early	0.0238052	5.22179e-06	0.0359735	0.0412427	0.0143168	covTest	Original	Old
cg13028376	Financial hardship	8m	very early	0.0296689	3.35072e-08	0.00329606	-0.0110229	-0.0140662	covTest	Original	Old
cg13061648	Financial hardship	33m	very early	0.0234149	3.17742e-06	0.027429	-0.0270399	-0.0138185	covTest	Original	Old
cg13444151	Financial hardship	21m	very early	0.0248364	2.58996e-06	0.0232704	-0.0043001	-0.0035141	covTest	Original	Old
cg13528344	Financial hardship	8m	very early	0.0233524	3.78376e-06	0.0299043	-0.00317025	-0.00339908	covTest	Original	Old
cg13808936	Financial hardship	recency	recency	0.0254401	3.69195e-07	0.00745647	NA	NA	covTest	Original	Old
cg14196824	Financial hardship	8m	very early	0.0240568	3.93963e-06	0.0299043	-0.00493701	-0.00453621	covTest	Original	Old
cg14967972	Financial hardship	33m	very early	0.0207698	7.87514e-06	0.0468525	0.00208029	0.00309816	covTest	Original	Old
cg16152482	Financial hardship	33m	very early	0.0210635	6.02229e-06	0.0389905	-0.00292386	-0.00139726	covTest	Original	Old
cg16181903	Financial hardship	7y	middle	0.0201839	8.1632e-06	0.0474795	0.00858662	0.0065476	covTest	Original	Old
cg17057218	Financial hardship	8m	very early	0.0319541	1.86921e-07	0.00514332	-0.00953589	-0.00904778	covTest	Original	Old
cg17167021	Financial hardship	7y	middle	0.0216748	4.50015e-06	0.0330204	-0.00836357	-0.00915712	covTest	Original	Old
cg17409159	Financial hardship	recency	recency	0.0352166	7.09496e-09	0.0015618	NA	NA	covTest	Original	Old
cg17550708	Financial hardship	33m	very early	0.0275063	3.44246e-07	0.00745647	0.0109142	0.00708091	covTest	Original	Old
cg18438551	Financial hardship	33m	very early	0.0304199	7.69286e-08	0.00330991	0.0011338	0.00184091	covTest	Original	Old
cg18643445	Financial hardship	21m	very early	0.0214849	3.89653e-06	0.0299043	-0.00487767	-0.00215569	covTest	Original	Old
cg19103535	Financial hardship	7y	middle	0.0316403	4.1143e-08	0.00329606	-0.0045967	0.000230412	covTest	Original	Old
cg20098332	Financial hardship	21m	very early	0.024883	7.08565e-07	0.0111411	0.00169089	0.00217338	covTest	Original	Old
cg20430656	Financial hardship	7y	middle	0.0254583	1.64053e-06	0.0180564	0.00879499	0.00645638	covTest	Original	Old
cg20609096	Financial hardship	recency	recency	0.0234919	7.02204e-06	0.0429375	NA	NA	covTest	Original	Old
cg21281009	Financial hardship	7y	middle	0.025951	5.74982e-07	0.00973615	0.00122703	0.00182477	covTest	Original	Old
cg21299458	Financial hardship	61m	early	0.0350008	3.56376e-09	0.0015618	0.0198634	0.0212121	covTest	Original	Old
cg21515159	Financial hardship	61m	early	0.0239854	1.3895e-06	0.0165334	-0.00163146	-0.000264089	covTest	Original	Old
cg22278782	Financial hardship	8m	very early	0.0214046	2.42366e-06	0.0231964	0.00767881	0.00619965	covTest	Original	Old
cg22312354	Financial hardship	61m	early	0.0211319	4.19413e-06	0.0312966	0.00968938	0.00378227	covTest	Original	Old
cg23891286	Financial hardship	recency	recency	0.0306379	6.08661e-08	0.00330991	NA	NA	covTest	Original	Old
cg24305835	Financial hardship	61m	early	0.0229517	6.86909e-06	0.0429375	-0.00150577	-0.000321439	covTest	Original	Old
cg24996440	Financial hardship	recency	recency	0.0235579	8.92637e-06	0.0497455	NA	NA	covTest	Original	Old
cg25154306	Financial hardship	7y	middle	0.0273812	1.0184e-07	0.00330991	-0.00584822	0.00116631	covTest	Original	Old
cg25154609	Financial hardship	33m	very early	0.0269081	6.42346e-06	0.0409851	-0.0139064	-0.00611616	covTest	Original	Old
cg25258938	Financial hardship	7y	middle	0.0245305	2.5457e-06	0.0232704	-0.0190854	-0.0125734	covTest	Original	Old
cg25755851	Financial hardship	21m	very early	0.0201523	5.60808e-06	0.037409	-0.00828214	-0.0214763	covTest	Original	Old
cg25772299	Financial hardship	accumulation	accumulation	0.0325653	2.86538e-07	0.0066395	NA	NA	covTest	Original	Old
cg26209369	Financial hardship	33m	very early	0.0242559	1.96411e-06	0.0196526	-0.00948662	-0.0052192	covTest	Original	Old
cg26421554	Financial hardship	21m	very early	0.0251019	7.69388e-07	0.0116803	-0.00710207	-0.002067	covTest	Original	Old
cg26787894	Financial hardship	7y	middle	0.0333939	5.24066e-08	0.00329606	0.000963344	0.00060379	covTest	Original	Old
cg27657867	Financial hardship	8m	very early	0.0235952	8.44125e-07	0.011933	0.00234538	0.00671038	covTest	Original	Old
cg00103568	Maternal psychopathology	8m	very early	0.0250351	2.90392e-06	0.0426156	0.0557657	0.00717012	covTest	Original	Old
cg00613997	Maternal psychopathology	6y	middle	0.0246294	1.9081e-06	0.0311131	-0.0334399	-0.0160955	covTest	Original	Old
cg00707406	Maternal psychopathology	6y	middle	0.0270539	6.65237e-07	0.0196438	-0.0117481	-0.0289374	covTest	Original	Old
cg01426041	Maternal psychopathology	6y	middle	0.0243318	6.16643e-07	0.0196438	0.00491794	0.00493603	covTest	Original	Old
cg01446894	Maternal psychopathology	21m	very early	0.0282666	2.43936e-07	0.0173891	0.00660915	0.00856486	covTest	Original	Old
cg01506871	Maternal psychopathology	61m	early	0.0225437	2.90203e-06	0.0426156	0.000806717	0.00104494	covTest	Original	Old
cg01565237	Maternal psychopathology	6y	middle	0.0253231	6.44766e-07	0.0196438	-0.00171282	-0.000397124	covTest	Original	Old
cg01834566	Maternal psychopathology	6y	middle	0.0262213	1.4412e-07	0.0158624	0.00152307	0.00106014	covTest	Original	Old
cg02977254	Maternal psychopathology	6y	middle	0.0256618	3.1598e-07	0.0173891	-0.0209694	-0.0170273	covTest	Original	Old
cg04445570	Maternal psychopathology	61m	early	0.0270713	3.12028e-07	0.0173891	-0.00819365	-0.00715792	covTest	Original	Old
cg04532153	Maternal psychopathology	21m	very early	0.0236341	3.12329e-06	0.0443564	0.00122966	0.00145521	covTest	Original	Old
cg04583813	Maternal psychopathology	8m	very early	0.0326199	4.03376e-08	0.00591963	-0.0152794	-0.0162968	covTest	Original	Old
cg05070839	Maternal psychopathology	8m	very early	0.0249767	1.3354e-06	0.029396	-0.00919824	-0.0036861	covTest	Original	Old
cg05526015	Maternal psychopathology	61m	early	0.0247574	1.73279e-06	0.0305148	-0.0101657	-0.00958493	covTest	Original	Old
cg05573208	Maternal psychopathology	6y	middle	0.0218433	1.72592e-06	0.0305148	-0.0168913	-0.0170503	covTest	Original	Old
cg05929056	Maternal psychopathology	61m	early	0.0243986	1.1524e-06	0.0281863	-0.0577317	-0.0261432	covTest	Original	Old
cg05994508	Maternal psychopathology	6y	middle	0.0236194	3.89255e-07	0.0190414	-0.00149292	-0.000390155	covTest	Original	Old
cg06434997	Maternal psychopathology	8m	very early	0.025259	6.69285e-07	0.0196438	0.00159581	0.000347434	covTest	Original	Old
cg06869505	Maternal psychopathology	accumulation	accumulation	0.0264118	1.58625e-06	0.0305148	NA	NA	covTest	Original	Old
cg08171937	Maternal psychopathology	33m	very early	0.0329218	1.41546e-09	0.000623166	0.00108082	0.0013704	covTest	Original	Old
cg08216050	Maternal psychopathology	8m	very early	0.0246474	2.80649e-07	0.0173891	0.0023542	0.000732253	covTest	Original	Old
cg10292855	Maternal psychopathology	21m	very early	0.0249471	1.31945e-06	0.029396	0.0340856	0.016671	covTest	Original	Old
cg10666628	Maternal psychopathology	33m	very early	0.0277469	5.19544e-07	0.0196438	0.00131816	0.000710532	covTest	Original	Old
cg11414263	Maternal psychopathology	33m	very early	0.0276543	7.3529e-07	0.0202323	-0.00310023	-0.00297368	covTest	Original	Old
cg13881299	Maternal psychopathology	33m	very early	0.0231272	1.65515e-06	0.0305148	0.00682188	0.00493859	covTest	Original	Old
cg14515274	Maternal psychopathology	8m	very early	0.0245095	1.09733e-06	0.0281863	-0.00290039	-0.00115515	covTest	Original	Old
cg16207905	Maternal psychopathology	6y	middle	0.0257919	2.24844e-06	0.0353533	0.0116207	0.00434975	covTest	Original	Old
cg17806989	Maternal psychopathology	61m	early	0.0324951	1.08063e-08	0.00237878	-0.00431305	-0.00539317	covTest	Original	Old
cg21949355	Maternal psychopathology	6y	middle	0.024753	1.86241e-06	0.0311131	-0.0359405	-0.0233885	covTest	Original	Old
cg26233832	Maternal psychopathology	8m	very early	0.0253869	4.83968e-07	0.0196438	0.00775757	0.00301065	covTest	Original	Old
cg27137978	Maternal psychopathology	6y	middle	0.0262322	1.64046e-06	0.0305148	-0.00161911	-0.000276079	covTest	Original	Old
cg00155535	Neighborhood disadvantage	33m	very early	0.0195937	1.14523e-05	0.0438429	-0.00794349	-0.0138665	covTest	Original	Old
cg00222601	Neighborhood disadvantage	21m	very early	0.0235542	1.2327e-06	0.015962	-0.000739879	-0.00035616	covTest	Original	Old
cg00486627	Neighborhood disadvantage	61m	early	0.021196	9.88455e-06	0.0424985	-0.000200936	-6.24361e-05	covTest	Original	Old
cg00689067	Neighborhood disadvantage	21m	very early	0.0197062	8.80378e-06	0.0422183	-0.00457165	-0.00199657	covTest	Original	Old
cg00928478	Neighborhood disadvantage	21m	very early	0.0275899	4.25192e-08	0.00267419	-0.000438688	0.00219899	covTest	Original	Old
cg00981117	Neighborhood disadvantage	61m	early	0.022753	2.98899e-06	0.0230966	3.47253e-05	-4.57179e-05	covTest	Original	Old
cg01142386	Neighborhood disadvantage	21m	very early	0.0239989	4.80473e-07	0.0105766	0.000141782	-0.000111006	covTest	Original	Old
cg01393233	Neighborhood disadvantage	7y	middle	0.020568	7.60032e-06	0.040806	0.000101447	0.000755392	covTest	Original	Old
cg01485075	Neighborhood disadvantage	7y	middle	0.0203389	8.49262e-06	0.0422183	-0.000476814	-0.000291254	covTest	Original	Old
cg01954337	Neighborhood disadvantage	21m	very early	0.0259619	6.05054e-07	0.011647	-0.0013381	-0.000670165	covTest	Original	Old
cg01978105	Neighborhood disadvantage	21m	very early	0.0216276	1.39884e-06	0.0168405	-0.00152232	-0.00165696	covTest	Original	Old
cg02144933	Neighborhood disadvantage	33m	very early	0.0246389	7.29171e-07	0.011647	0.000115279	0.00177704	covTest	Original	Old
cg02337388	Neighborhood disadvantage	33m	very early	0.0218704	8.65953e-06	0.0422183	-0.0220129	-0.00786459	covTest	Original	Old
cg02351804	Neighborhood disadvantage	61m	early	0.0238786	7.40646e-07	0.011647	0.000479095	0.000609336	covTest	Original	Old
cg02577368	Neighborhood disadvantage	21m	very early	0.0187362	8.62123e-06	0.0422183	-0.000395798	-0.000103496	covTest	Original	Old
cg02731917	Neighborhood disadvantage	21m	very early	0.0191125	1.41609e-05	0.0490902	-0.00579224	-0.0153033	covTest	Original	Old
cg03144643	Neighborhood disadvantage	21m	very early	0.0201541	3.87959e-06	0.0266877	4.32677e-05	-0.000248219	covTest	Original	Old
cg03532019	Neighborhood disadvantage	21m	very early	0.0182451	1.04316e-05	0.0424985	0.000518387	-0.00214653	covTest	Original	Old
cg03774520	Neighborhood disadvantage	33m	very early	0.0268284	1.50094e-07	0.00660799	-0.00147632	0.000644208	covTest	Original	Old
cg03897318	Neighborhood disadvantage	21m	very early	0.0193837	1.25629e-05	0.0457099	1.61415e-05	0.000105745	covTest	Original	Old
cg03905500	Neighborhood disadvantage	7y	middle	0.0201533	8.51189e-06	0.0422183	-0.00492558	-0.00362235	covTest	Original	Old
cg04007726	Neighborhood disadvantage	7y	middle	0.0294569	1.70189e-07	0.00681152	0.000640614	-8.75955e-05	covTest	Original	Old
cg04070533	Neighborhood disadvantage	21m	very early	0.0198482	1.40872e-05	0.0490902	0.000345614	0.0039013	covTest	Original	Old
cg04996689	Neighborhood disadvantage	21m	very early	0.028325	2.74798e-08	0.00201636	0.000274918	4.48701e-06	covTest	Original	Old
cg05014211	Neighborhood disadvantage	61m	early	0.024883	3.20231e-06	0.0230966	-0.00102132	-0.000623545	covTest	Original	Old
cg05262224	Neighborhood disadvantage	21m	very early	0.0252244	2.38755e-07	0.00808566	0.0023665	-0.000882166	covTest	Original	Old
cg05438508	Neighborhood disadvantage	21m	very early	0.0217585	9.04153e-06	0.0423468	0.00379869	0.00208323	covTest	Original	Old
cg05671762	Neighborhood disadvantage	21m	very early	0.0243401	4.04786e-07	0.0104532	-0.000400097	0.00568352	covTest	Original	Old
cg05754631	Neighborhood disadvantage	61m	early	0.0194169	1.13361e-05	0.0438057	0.00108039	0.000579116	covTest	Original	Old
cg05826255	Neighborhood disadvantage	21m	very early	0.0174195	1.22695e-05	0.0453928	0.00223069	0.00754683	covTest	Original	Old
cg05950485	Neighborhood disadvantage	21m	very early	0.0215828	1.15599e-05	0.0438734	-0.000416304	0.000563327	covTest	Original	Old
cg06116495	Neighborhood disadvantage	7y	middle	0.0201831	4.42886e-06	0.0291021	5.1893e-06	-4.66691e-05	covTest	Original	Old
cg06312776	Neighborhood disadvantage	21m	very early	0.0251991	3.80872e-07	0.0104532	0.000217318	0.000533578	covTest	Original	Old
cg06726860	Neighborhood disadvantage	21m	very early	0.0258791	4.50865e-07	0.0104532	0.00764768	-0.00207451	covTest	Original	Old
cg06793974	Neighborhood disadvantage	33m	very early	0.0247282	7.31931e-07	0.011647	-0.000781823	0.000658711	covTest	Original	Old
cg06863171	Neighborhood disadvantage	21m	very early	0.0179733	1.45552e-05	0.0498987	-0.00183568	-4.11238e-05	covTest	Original	Old
cg06990460	Neighborhood disadvantage	33m	very early	0.0207401	3.11266e-06	0.0230966	0.00419916	0.0124163	covTest	Original	Old
cg07103917	Neighborhood disadvantage	21m	very early	0.0207399	7.26589e-06	0.0404919	0.000722456	-4.03261e-05	covTest	Original	Old
cg07192857	Neighborhood disadvantage	21m	very early	0.0206368	6.40545e-06	0.0386307	-0.000374024	0.00253321	covTest	Original	Old
cg07250177	Neighborhood disadvantage	33m	very early	0.019294	1.1343e-05	0.0438057	0.00106396	0.0010121	covTest	Original	Old
cg07782113	Neighborhood disadvantage	61m	early	0.0210819	1.13253e-05	0.0438057	-0.000303083	0.00078011	covTest	Original	Old
cg08080923	Neighborhood disadvantage	21m	very early	0.0220762	1.41531e-06	0.0168405	0.0012866	-0.00367981	covTest	Original	Old
cg08121408	Neighborhood disadvantage	33m	very early	0.0216642	2.83488e-06	0.0226923	-0.0197939	-0.00798557	covTest	Original	Old
cg08198132	Neighborhood disadvantage	21m	very early	0.0210673	5.31972e-06	0.0344418	-8.19927e-05	-0.00020385	covTest	Original	Old
cg08307171	Neighborhood disadvantage	21m	very early	0.0209132	1.94241e-06	0.0178158	0.0151685	0.00417293	covTest	Original	Old
cg08433504	Neighborhood disadvantage	21m	very early	0.0216786	5.63118e-06	0.0354167	-0.00174732	-0.00243292	covTest	Original	Old
cg08447733	Neighborhood disadvantage	61m	early	0.0236242	7.74499e-07	0.011647	0.000591207	0.00422951	covTest	Original	Old
cg08470991	Neighborhood disadvantage	21m	very early	0.0244021	8.92366e-07	0.0126732	-0.000565582	0.00272446	covTest	Original	Old
cg08546016	Neighborhood disadvantage	61m	early	0.0289238	9.34298e-09	0.00111426	0.000843128	0.0058519	covTest	Original	Old
cg08788246	Neighborhood disadvantage	61m	early	0.0214849	6.59572e-06	0.0387175	0.00156566	0.00223563	covTest	Original	Old
cg08994498	Neighborhood disadvantage	21m	very early	0.0257681	1.10638e-06	0.0147603	0.000533063	0.00697069	covTest	Original	Old
cg09304460	Neighborhood disadvantage	21m	very early	0.0244639	4.30714e-07	0.0104532	0.00142066	0.000176163	covTest	Original	Old
cg09332592	Neighborhood disadvantage	21m	very early	0.0214615	7.18596e-06	0.0404919	6.98134e-05	0.00312404	covTest	Original	Old
cg09349604	Neighborhood disadvantage	61m	early	0.0228412	1.04583e-06	0.0143886	-0.000329115	-0.000885954	covTest	Original	Old
cg09563240	Neighborhood disadvantage	21m	very early	0.0201903	1.0112e-05	0.0424985	4.71077e-05	-9.43457e-05	covTest	Original	Old
cg09670189	Neighborhood disadvantage	21m	very early	0.0203663	8.43556e-06	0.0422183	-0.000366323	-0.000420694	covTest	Original	Old
cg09844983	Neighborhood disadvantage	21m	very early	0.0205157	1.62678e-06	0.0172375	-0.00015479	0.00374938	covTest	Original	Old
cg10000825	Neighborhood disadvantage	21m	very early	0.0243165	7.93652e-07	0.011647	0.00154447	0.0026993	covTest	Original	Old
cg10110953	Neighborhood disadvantage	21m	very early	0.0199696	1.46209e-05	0.0498987	-0.000452556	-0.000269201	covTest	Original	Old
cg10779348	Neighborhood disadvantage	33m	very early	0.020057	1.1075e-05	0.0438057	-0.00168672	0.00126137	covTest	Original	Old
cg10933428	Neighborhood disadvantage	7y	middle	0.0207905	3.14596e-06	0.0230966	-0.00103067	-0.000652862	covTest	Original	Old
cg11034861	Neighborhood disadvantage	21m	very early	0.024569	3.81156e-06	0.026636	0.000313833	0.000849564	covTest	Original	Old
cg11159141	Neighborhood disadvantage	21m	very early	0.0215822	2.35951e-06	0.0199768	0.00173394	0.00701305	covTest	Original	Old
cg11640562	Neighborhood disadvantage	33m	very early	0.0206578	5.94917e-06	0.0363773	-0.0257493	-0.0183211	covTest	Original	Old
cg11696475	Neighborhood disadvantage	21m	very early	0.0203947	6.94809e-06	0.0397266	-0.000330388	-0.000320208	covTest	Original	Old
cg11845071	Neighborhood disadvantage	21m	very early	0.0201099	1.11374e-05	0.0438057	-0.000148116	-0.000349721	covTest	Original	Old
cg11855615	Neighborhood disadvantage	21m	very early	0.0224148	1.38758e-05	0.0490902	-0.0126033	-0.0110766	covTest	Original	Old
cg12052250	Neighborhood disadvantage	21m	very early	0.0237973	1.39187e-05	0.0490902	0.00680516	-0.00223589	covTest	Original	Old
cg12069925	Neighborhood disadvantage	21m	very early	0.0287824	1.27865e-08	0.00112587	-0.00183626	-0.00143871	covTest	Original	Old
cg12119313	Neighborhood disadvantage	61m	early	0.0200886	9.52072e-06	0.0424985	-0.000336916	-0.000235851	covTest	Original	Old
cg12273319	Neighborhood disadvantage	33m	very early	0.0194041	1.16632e-05	0.0438871	-0.00211192	-0.00630316	covTest	Original	Old
cg12377709	Neighborhood disadvantage	7y	middle	0.0240695	1.84446e-06	0.017653	0.000252964	-0.000261134	covTest	Original	Old
cg12412390	Neighborhood disadvantage	7y	middle	0.0278548	1.71301e-06	0.0172375	-0.000530671	-0.000181753	covTest	Original	Old
cg12522599	Neighborhood disadvantage	accumulation	accumulation	0.0234238	3.25262e-06	0.0230966	NA	NA	covTest	Original	Old
cg12889045	Neighborhood disadvantage	21m	very early	0.0261962	7.01193e-07	0.011647	0.000334512	0.000581029	covTest	Original	Old
cg13066542	Neighborhood disadvantage	7y	middle	0.0192206	4.36845e-06	0.0291021	6.88624e-05	0.000492289	covTest	Original	Old
cg13138088	Neighborhood disadvantage	21m	very early	0.0184504	1.401e-05	0.0490902	0.00125852	0.000205656	covTest	Original	Old
cg13198844	Neighborhood disadvantage	21m	very early	0.024041	1.6599e-06	0.0172375	0.00120479	0.000895532	covTest	Original	Old
cg13237906	Neighborhood disadvantage	61m	early	0.0226685	7.0431e-07	0.011647	0.000131187	0.000567743	covTest	Original	Old
cg13258563	Neighborhood disadvantage	21m	very early	0.019976	1.28605e-05	0.0464093	0.00272435	0.000616609	covTest	Original	Old
cg13320898	Neighborhood disadvantage	21m	very early	0.0212977	5.50502e-06	0.035125	0.00295227	0.00481304	covTest	Original	Old
cg13442116	Neighborhood disadvantage	7y	middle	0.0212511	6.90026e-06	0.0397266	0.00171285	0.00396842	covTest	Original	Old
cg13443103	Neighborhood disadvantage	recency	recency	0.0278216	2.90999e-07	0.00915102	NA	NA	covTest	Original	Old
cg14036627	Neighborhood disadvantage	33m	very early	0.0212579	1.01607e-05	0.0424985	0.0117869	0.0132418	covTest	Original	Old
cg14083890	Neighborhood disadvantage	7y	middle	0.0256238	1.20482e-07	0.00660799	0.000577143	-0.00337783	covTest	Original	Old
cg14085203	Neighborhood disadvantage	21m	very early	0.0202598	7.50625e-06	0.0407985	9.03228e-05	0.00270178	covTest	Original	Old
cg14324370	Neighborhood disadvantage	21m	very early	0.021471	8.5213e-06	0.0422183	-9.27053e-05	-0.000169228	covTest	Original	Old
cg14477452	Neighborhood disadvantage	21m	very early	0.0193451	1.02984e-05	0.0424985	-0.00110274	0.00177386	covTest	Original	Old
cg14522055	Neighborhood disadvantage	21m	very early	0.026586	2.38745e-07	0.00808566	0.000732663	-0.000308324	covTest	Original	Old
cg15627089	Neighborhood disadvantage	33m	very early	0.0216663	7.95043e-06	0.0421715	-0.00244623	-0.00063195	covTest	Original	Old
cg15959756	Neighborhood disadvantage	21m	very early	0.0220256	2.30026e-06	0.019857	8.8269e-05	0.0030065	covTest	Original	Old
cg16309325	Neighborhood disadvantage	7y	middle	0.0217936	7.46331e-06	0.0407985	0.00208665	0.000338533	covTest	Original	Old
cg16378549	Neighborhood disadvantage	21m	very early	0.0252447	1.28492e-06	0.0161627	-0.000472051	0.00145629	covTest	Original	Old
cg17608082	Neighborhood disadvantage	33m	very early	0.0205653	8.10634e-06	0.0422183	0.00613483	0.000196542	covTest	Original	Old
cg17855279	Neighborhood disadvantage	33m	very early	0.0193553	6.57665e-06	0.0387175	-0.00415816	-0.00852929	covTest	Original	Old
cg18001714	Neighborhood disadvantage	21m	very early	0.0234024	1.72641e-06	0.0172375	-0.000770713	0.000555319	covTest	Original	Old
cg18045395	Neighborhood disadvantage	21m	very early	0.0202463	4.19263e-06	0.0283974	0.00188834	0.00413212	covTest	Original	Old
cg18074450	Neighborhood disadvantage	21m	very early	0.0196488	1.05194e-05	0.0424985	-0.0016672	-0.00515656	covTest	Original	Old
cg18642177	Neighborhood disadvantage	61m	early	0.0238361	1.58361e-06	0.0172375	0.000279598	0.00373769	covTest	Original	Old
cg19157140	Neighborhood disadvantage	21m	very early	0.0355752	2.5064e-10	0.000110346	0.000440996	0.000147396	covTest	Original	Old
cg19921355	Neighborhood disadvantage	21m	very early	0.020166	8.86232e-06	0.0422183	-0.0011488	0.0120458	covTest	Original	Old
cg19983274	Neighborhood disadvantage	21m	very early	0.0208489	1.00595e-05	0.0424985	-0.000351054	-0.000327214	covTest	Original	Old
cg20656116	Neighborhood disadvantage	21m	very early	0.0195361	1.24237e-05	0.04558	-0.000275483	-7.8085e-05	covTest	Original	Old
cg20710902	Neighborhood disadvantage	33m	very early	0.0232321	2.18286e-06	0.0192204	0.000619367	-0.000732157	covTest	Original	Old
cg21650694	Neighborhood disadvantage	21m	very early	0.0215359	2.79143e-06	0.0226923	0.000123782	-0.00011104	covTest	Original	Old
cg21740964	Neighborhood disadvantage	21m	very early	0.0296894	8.92701e-09	0.00111426	-0.000615437	0.00435961	covTest	Original	Old
cg21751058	Neighborhood disadvantage	21m	very early	0.0214468	3.24776e-06	0.0230966	-0.000238475	-0.00124758	covTest	Original	Old
cg21858108	Neighborhood disadvantage	33m	very early	0.0201007	5.89798e-06	0.0363773	-0.00668982	-0.0118472	covTest	Original	Old
cg22396033	Neighborhood disadvantage	21m	very early	0.0261919	7.63008e-07	0.011647	0.000366001	0.000281195	covTest	Original	Old
cg22918572	Neighborhood disadvantage	21m	very early	0.0204657	9.44861e-06	0.0424985	0.000982661	0.000639495	covTest	Original	Old
cg23691781	Neighborhood disadvantage	21m	very early	0.0216947	1.05219e-05	0.0424985	-0.000492552	0.0119832	covTest	Original	Old
cg24278036	Neighborhood disadvantage	21m	very early	0.0217741	9.71079e-06	0.0424985	-0.000463318	0.00384116	covTest	Original	Old
cg24399556	Neighborhood disadvantage	21m	very early	0.0240146	1.99263e-06	0.0179034	0.000453648	2.38482e-05	covTest	Original	Old
cg24678113	Neighborhood disadvantage	33m	very early	0.0212164	1.93137e-06	0.0178158	0.00459952	0.00265766	covTest	Original	Old
cg24706697	Neighborhood disadvantage	21m	very early	0.0228972	1.03837e-05	0.0424985	0.000135705	-4.06789e-05	covTest	Original	Old
cg24826892	Neighborhood disadvantage	21m	very early	0.0305923	1.01238e-08	0.00111426	6.87846e-05	-0.000129196	covTest	Original	Old
cg25035939	Neighborhood disadvantage	61m	early	0.022456	1.46263e-06	0.0169456	4.52393e-06	0.000298164	covTest	Original	Old
cg25160915	Neighborhood disadvantage	7y	middle	0.0258218	4.51123e-07	0.0104532	0.000103287	0.000400667	covTest	Original	Old
cg25195497	Neighborhood disadvantage	21m	very early	0.026035	5.54973e-07	0.0116348	0.00104521	0.0105504	covTest	Original	Old
cg25615509	Neighborhood disadvantage	21m	very early	0.0214662	1.66854e-06	0.0172375	0.000333012	0.00026546	covTest	Original	Old
cg25931138	Neighborhood disadvantage	21m	very early	0.0199571	1.04798e-05	0.0424985	0.00084819	0.00222603	covTest	Original	Old
cg25990985	Neighborhood disadvantage	61m	early	0.0239835	3.21969e-06	0.0230966	0.00424878	0.001443	covTest	Original	Old
cg26492833	Neighborhood disadvantage	21m	very early	0.019985	9.86735e-06	0.0424985	-0.00045853	-0.000184877	covTest	Original	Old
cg26494610	Neighborhood disadvantage	21m	very early	0.0245514	1.44056e-07	0.00660799	0.00127292	-0.00601072	covTest	Original	Old
cg26567712	Neighborhood disadvantage	21m	very early	0.0211529	2.82759e-06	0.0226923	-0.000523032	-0.000272849	covTest	Original	Old
cg26650731	Neighborhood disadvantage	7y	middle	0.01821	1.22562e-05	0.0453928	-4.13718e-05	0.00211727	covTest	Original	Old
cg27084026	Neighborhood disadvantage	21m	very early	0.021298	8.9182e-06	0.0422183	0.000400942	0.000154603	covTest	Original	Old
cg27313572	Neighborhood disadvantage	21m	very early	0.0189666	1.03796e-05	0.0424985	0.000254485	-2.40351e-05	covTest	Original	Old
cg27481837	Neighborhood disadvantage	33m	very early	0.023016	1.7619e-06	0.0172375	0.00430048	0.00280283	covTest	Original	Old
cg01398428	One adult household	33m	very early	0.0235365	1.49293e-06	0.0334324	-0.0240859	-0.0192138	covTest	Original	Old
cg01681072	One adult household	7y	middle	0.0277144	7.14165e-08	0.00524027	-0.0263799	-0.0193563	covTest	Original	Old
cg02689506	One adult household	33m	very early	0.027492	3.66948e-07	0.0134626	0.00491784	0.0067636	covTest	Original	Old
cg03397307	One adult household	33m	very early	0.0319228	3.27486e-09	0.00072089	0.00252432	0.00142166	covTest	Original	Old
cg03568718	One adult household	8m	very early	0.020308	3.02328e-06	0.0487503	-0.0245836	-0.0275072	covTest	Original	Old
cg05049576	One adult household	7y	middle	0.024638	8.28904e-07	0.0280716	0.0222212	0.00978956	covTest	Original	Old
cg06942159	One adult household	33m	very early	0.0254416	2.18533e-07	0.0120263	0.00344496	0.00201284	covTest	Original	Old
cg08337366	One adult household	8m	very early	0.0310766	3.97444e-08	0.00437444	-0.0186626	-0.0181782	covTest	Original	Old
cg08450982	One adult household	7y	middle	0.0250732	2.94494e-07	0.0127799	-0.0201297	-0.0184633	covTest	Original	Old
cg09023608	One adult household	8m	very early	0.0229957	2.32542e-06	0.0409512	-0.0183094	-0.0192858	covTest	Original	Old
cg10192047	One adult household	8m	very early	0.0303674	6.83888e-09	0.00100362	0.00165424	0.00053468	covTest	Original	Old
cg10817223	One adult household	8m	very early	0.0235415	1.40515e-06	0.0334324	-0.00885394	-0.0125469	covTest	Original	Old
cg12597983	One adult household	7y	middle	0.0219953	2.62787e-06	0.0444976	0.00874342	0.00546816	covTest	Original	Old
cg14833337	One adult household	8m	very early	0.023077	1.98455e-06	0.0397142	-0.00888015	-0.0164812	covTest	Original	Old
cg15720547	One adult household	7y	middle	0.0202251	3.10048e-06	0.0487503	0.00172365	0.00455281	covTest	Original	Old
cg17294308	One adult household	8m	very early	0.0260741	3.1931e-07	0.0127799	0.00208519	0.00417361	covTest	Original	Old
cg17831117	One adult household	47m	early	0.0223391	1.11042e-06	0.0334324	-0.0467224	-0.0395343	covTest	Original	Old
cg18022728	One adult household	21m	very early	0.0239371	2.23026e-06	0.0409512	0.00265017	0.00139487	covTest	Original	Old
cg23019745	One adult household	7y	middle	0.0230818	1.51877e-06	0.0334324	0.052545	0.0236335	covTest	Original	Old
cg23244559	One adult household	7y	middle	0.0221144	1.47775e-06	0.0334324	0.00342175	0.00913792	covTest	Original	Old
cg23699062	One adult household	7y	middle	0.0212497	2.24062e-06	0.0409512	0.0194272	0.0160387	covTest	Original	Old
cg24101873	One adult household	21m	very early	0.0220262	1.77287e-06	0.0371675	-0.00803706	-0.00801038	covTest	Original	Old
cg24468070	One adult household	21m	very early	0.0345242	4.38128e-10	0.000192889	0.0131543	0.00487295	covTest	Original	Old
cg24765924	One adult household	47m	early	0.0219607	1.17488e-06	0.0334324	0.00692048	0.014454	covTest	Original	Old
cg25069010	One adult household	33m	very early	0.0241187	1.34172e-06	0.0334324	-0.00985559	-0.0128111	covTest	Original	Old
cg25683012	One adult household	7y	middle	0.0259117	2.75411e-07	0.0127799	0.00275312	0.00461218	covTest	Original	Old
cg26984183	One adult household	8m	very early	0.0290181	1.3639e-07	0.00857806	-0.0460697	-0.0302302	covTest	Original	Old
cg26990406	One adult household	8m	very early	0.0284589	5.70303e-08	0.0050216	-0.0728317	-0.0329525	covTest	Original	Old
cg00705142	Caregiver physical/emotional abuse	6y	middle	0.0276652	5.20237e-08	0.00458076	0.0029186	0.00309827	covTest	Original	Old
cg00769470	Caregiver physical/emotional abuse	8m	very early	0.0265514	1.6738e-07	0.0105272	-0.0107536	-0.00756811	covTest	Original	Old
cg01126080	Caregiver physical/emotional abuse	6y	middle	0.0288291	2.65995e-08	0.00390353	-0.0135361	-0.00846708	covTest	Original	Old
cg01706819	Caregiver physical/emotional abuse	61m	early	0.0261883	4.36726e-07	0.0166595	-0.00317125	-0.00763017	covTest	Original	Old
cg01729862	Caregiver physical/emotional abuse	61m	early	0.0236584	9.34191e-07	0.0293774	0.00206158	0.00131457	covTest	Original	Old
cg02152417	Caregiver physical/emotional abuse	61m	early	0.0274831	7.52949e-08	0.00552485	-0.0100984	-0.00695424	covTest	Original	Old
cg06550546	Caregiver physical/emotional abuse	33m	very early	0.0254046	2.83284e-07	0.0138575	0.000830658	0.00138143	covTest	Original	Old
cg06779248	Caregiver physical/emotional abuse	6y	middle	0.0228991	1.44835e-06	0.0425097	0.0469928	0.0419817	covTest	Original	Old
cg08000672	Caregiver physical/emotional abuse	6y	middle	0.0261506	3.26737e-07	0.0143848	-0.0207885	-0.0167654	covTest	Original	Old
cg09301462	Caregiver physical/emotional abuse	21m	very early	0.0217292	1.85475e-06	0.0457242	-0.0153036	-0.00842345	covTest	Original	Old
cg09762115	Caregiver physical/emotional abuse	8m	very early	0.0262346	4.91925e-07	0.0166595	-0.00880968	-0.00915742	covTest	Original	Old
cg10713431	Caregiver physical/emotional abuse	6y	middle	0.0253578	4.35067e-08	0.00458076	0.00720602	0.024608	covTest	Original	Old
cg12023170	Caregiver physical/emotional abuse	6y	middle	0.0391211	3.22037e-10	0.000141779	0.0119531	0.0297873	covTest	Original	Old
cg13508391	Caregiver physical/emotional abuse	61m	early	0.0234808	1.60355e-06	0.0441233	0.00154394	0.000260628	covTest	Original	Old
cg15312673	Caregiver physical/emotional abuse	47m	early	0.0254584	2.36835e-07	0.0130335	0.00175923	0.00171888	covTest	Original	Old
cg16723130	Caregiver physical/emotional abuse	61m	early	0.0247638	4.78432e-07	0.0166595	-0.00109506	-0.00243678	covTest	Original	Old
cg19825600	Caregiver physical/emotional abuse	6y	middle	0.0293924	1.2392e-08	0.00272783	-0.0605364	-0.0770785	covTest	Original	Old
cg27093143	Caregiver physical/emotional abuse	61m	early	0.0234498	1.86944e-06	0.0457242	0.00555851	0.00265495	covTest	Original	Old
cg00294572	Family instability	57m	early	0.0245448	4.90022e-07	0.0215736	0.00362408	0.00688462	covTest	Original	Old
cg02975081	Family instability	30m	very early	0.0211653	2.58265e-06	0.0469343	0.0292915	0.0313489	covTest	Original	Old
cg03558326	Family instability	30m	very early	0.0238018	1.28985e-06	0.0298877	0.00437853	0.0120016	covTest	Original	Old
cg06249486	Family instability	42m	early	0.0230133	2.34172e-06	0.0468617	0.0036369	0.0148448	covTest	Original	Old
cg08066991	Family instability	69m	middle	0.0339261	1.18282e-09	0.000520743	0.066638	0.0474629	covTest	Original	Old
cg09612202	Family instability	69m	middle	0.0230183	1.27456e-06	0.0298877	0.0481277	0.0431919	covTest	Original	Old
cg10314807	Family instability	69m	middle	0.028036	8.18599e-07	0.0216227	-0.0177148	-0.0126256	covTest	Original	Old
cg10660909	Family instability	30m	very early	0.021059	2.52008e-06	0.0469343	0.00366183	0.00126887	covTest	Original	Old
cg11046380	Family instability	recency	recency	0.0274698	6.93515e-07	0.0216227	NA	NA	covTest	Original	Old
cg11213091	Family instability	18m	very early	0.0264196	4.39148e-07	0.0215736	-0.0172677	-0.0211188	covTest	Original	Old
cg12629098	Family instability	81m	middle	0.0257385	7.57048e-07	0.0216227	-0.0900803	-0.027161	covTest	Original	Old
cg13459498	Family instability	42m	early	0.028293	4.70451e-07	0.0215736	0.00851608	0.0034273	covTest	Original	Old
cg15577126	Family instability	57m	early	0.0273023	2.32192e-07	0.0170374	0.0547371	0.0268923	covTest	Original	Old
cg17102199	Family instability	42m	early	0.0260159	8.19065e-07	0.0216227	-0.0299309	-0.028526	covTest	Original	Old
cg17719337	Family instability	69m	middle	0.0245032	2.66516e-06	0.0469343	0.003912	0.0082611	covTest	Original	Old
cg18311384	Family instability	30m	very early	0.0293896	4.11705e-08	0.00906279	0.00170198	0.00473509	covTest	Original	Old
cg18501202	Family instability	42m	early	0.026246	3.50567e-07	0.0215736	0.00601149	0.0241661	covTest	Original	Old
cg18949702	Family instability	69m	middle	0.0270535	8.34935e-07	0.0216227	0.0639812	0.0258855	covTest	Original	Old
cg20485874	Family instability	69m	middle	0.025343	9.20263e-08	0.0105157	-0.0359099	-0.0172079	covTest	Original	Old
cg23954880	Family instability	42m	early	0.0256547	7.80745e-07	0.0216227	0.0245659	0.0167503	covTest	Original	Old
cg24563570	Family instability	30m	very early	0.0224784	1.57891e-06	0.0347563	0.00853979	0.00436749	covTest	Original	Old
cg24711070	Family instability	81m	middle	0.0272929	1.5288e-07	0.0134613	-0.0328043	-0.0246105	covTest	Original	Old
cg25477176	Family instability	57m	early	0.0257579	6.18245e-07	0.0216227	-0.0356411	-0.0193196	covTest	Original	Old
cg26200141	Family instability	42m	early	0.02477	1.85103e-06	0.0388062	-0.00616959	-0.0139662	covTest	Original	Old
cg27637303	Family instability	30m	very early	0.0281031	9.55419e-08	0.0105157	0.0461185	0.0356849	covTest	Original	Old
cg00455546	Prenatal smoking	accumulation	accumulation	0.0375568	9.4813e-14	2.08711e-08	NA	NA	CovTest	Original	Old
cg01904216	Prenatal smoking	second	second	0.0201071	3.55259e-07	0.0120312	-0.00894711	-0.00718646	CovTest	Original	Old
cg02305289	Prenatal smoking	accumulation	accumulation	0.0177978	8.29062e-07	0.0214706	NA	NA	CovTest	Original	Old
cg04475936	Prenatal smoking	second	second	0.0171719	1.72259e-06	0.0329731	0.00178908	0.00373457	CovTest	Original	Old
cg05608730	Prenatal smoking	second	second	0.0182488	2.39319e-06	0.0439008	-0.00290883	-0.00298956	CovTest	Original	Old
cg05627727	Prenatal smoking	second	second	0.0199627	6.01215e-08	0.00505743	0.00293302	0.00480357	CovTest	Original	Old
cg05929056	Prenatal smoking	second	second	0.0206647	3.01032e-07	0.0110443	0.000497785	0.00129931	CovTest	Original	Old
cg06313433	Prenatal smoking	accumulation	accumulation	0.0209428	1.27591e-06	0.026749	NA	NA	CovTest	Original	Old
cg08617346	Prenatal smoking	accumulation	accumulation	0.0232884	3.6845e-08	0.00405531	NA	NA	CovTest	Original	Old
cg08814640	Prenatal smoking	second	second	0.0209952	1.64994e-07	0.00807108	0.0136508	0.00627052	CovTest	Original	Old
cg09429437	Prenatal smoking	accumulation	accumulation	0.0203353	7.13928e-07	0.0196445	NA	NA	CovTest	Original	Old
cg09693432	Prenatal smoking	accumulation	accumulation	0.0213669	1.29677e-07	0.0071364	NA	NA	CovTest	Original	Old
cg11742922	Prenatal smoking	second	second	0.0171086	1.0646e-06	0.0257773	0.00304713	0.00421522	CovTest	Original	Old
cg13166942	Prenatal smoking	accumulation	accumulation	0.0208319	1.20647e-07	0.0071364	NA	NA	CovTest	Original	Old
cg13220290	Prenatal smoking	accumulation	accumulation	0.0464905	0	0	NA	NA	CovTest	Original	Old
cg14519887	Prenatal smoking	second	second	0.019643	2.53663e-07	0.0101525	-0.00655923	-0.00204204	CovTest	Original	Old
cg14696996	Prenatal smoking	accumulation	accumulation	0.0200452	1.13843e-06	0.0257773	NA	NA	CovTest	Original	Old
cg16925678	Prenatal smoking	accumulation	accumulation	0.020434	6.89247e-08	0.00505743	NA	NA	CovTest	Original	Old
cg20193324	Prenatal smoking	accumulation	accumulation	0.0162924	1.46184e-06	0.0292538	NA	NA	CovTest	Original	Old
cg20578780	Prenatal smoking	accumulation	accumulation	0.0238814	8.21013e-09	0.00120486	NA	NA	CovTest	Original	Old
cg22258358	Prenatal smoking	second	second	0.0169851	1.17101e-06	0.0257773	0.00261486	0.00221122	CovTest	Original	Old
cg24348495	Prenatal smoking	accumulation	accumulation	0.0181786	5.82829e-07	0.0171063	NA	NA	CovTest	Original	Old
cg25497850	Prenatal smoking	second	second	0.019019	4.49072e-07	0.0141219	-0.000199873	0.00320988	CovTest	Original	Old
cg26892251	Prenatal smoking	accumulation	accumulation	0.0215636	2.14102e-07	0.00942598	NA	NA	CovTest	Original	Old

## Sheet: S4. New data, standard analysis
Table S4. CpGs associated with childhood adversity or prenatal smoking in the SLCMA of new data in the original analysis
CpG	Adversity	Model	Timing	R2	P.value	FDR	%DNAm change (old)	%DNAm change (new)	Method	Covariates	Data
cg20000088	Physical/sexual abuse	42m	early	0.0250774	3.17053e-07	0.0276396	-0.0111277	-0.0138969	covTest	Original	New
cg19597382	Physical/sexual abuse	42m	early	0.0238989	1.75451e-06	0.0382734	0.00454377	0.00251127	covTest	Original	New
cg20677982	Physical/sexual abuse	42m	early	0.0258052	1.93132e-06	0.0382734	0.0109519	0.00623881	covTest	Original	New
cg05705018	Physical/sexual abuse	18m	very early	0.0254636	2.04739e-06	0.0382734	-0.0190801	-0.0272095	covTest	Original	New
cg27477504	Physical/sexual abuse	30m	very early	0.0248195	1.11252e-06	0.0326531	-0.0186957	-0.0118569	covTest	Original	New
cg18542056	Physical/sexual abuse	57m	early	0.0263555	2.31685e-07	0.0276396	0.00655184	0.0149134	covTest	Original	New
cg22581974	Physical/sexual abuse	57m	early	0.0227918	2.38314e-06	0.0388591	0.00178532	0.00133687	covTest	Original	New
cg03185022	Physical/sexual abuse	30m	very early	0.0258785	9.35594e-08	0.0205951	-0.00114529	-0.00107983	covTest	Original	New
cg00547365	Physical/sexual abuse	57m	early	0.0250027	9.18415e-07	0.0326531	-0.011635	-0.0185668	covTest	Original	New
cg01935086	Physical/sexual abuse	42m	early	0.0238112	2.09724e-06	0.0382734	-0.0176752	-0.036468	covTest	Original	New
cg03178857	Physical/sexual abuse	81m	middle	0.0254264	4.21642e-07	0.0276396	-0.01814	-0.0174504	covTest	Original	New
cg12082681	Physical/sexual abuse	30m	very early	0.0245811	1.87524e-06	0.0382734	-0.0181732	-0.017714	covTest	Original	New
cg20369299	Physical/sexual abuse	57m	early	0.0358087	1.68405e-09	0.000741416	-0.0825441	-0.0746155	covTest	Original	New
cg02296890	Physical/sexual abuse	42m	early	0.0226005	1.10169e-06	0.0326531	0.0103909	0.012046	covTest	Original	New
cg04517282	Physical/sexual abuse	57m	early	0.0234965	2.87736e-06	0.0429502	0.00222644	0.0127507	covTest	Original	New
cg10930901	Physical/sexual abuse	57m	early	0.0253334	1.74925e-06	0.0382734	-0.0275075	-0.0426788	covTest	Original	New
cg13581155	Physical/sexual abuse	69m	middle	0.0285371	4.58663e-07	0.0276396	0.014724	0.0471251	covTest	Original	New
cg22247136	Physical/sexual abuse	57m	early	0.0248035	9.50221e-07	0.0326531	-0.0212947	-0.0153324	covTest	Original	New
cg23055003	Physical/sexual abuse	30m	very early	0.0239627	2.77638e-06	0.0429502	0.0026645	0.0085983	covTest	Original	New
cg27422807	Physical/sexual abuse	57m	early	0.0259571	5.47151e-07	0.0276396	-0.0180452	-0.0156855	covTest	Original	New
cg00754947	Physical/sexual abuse	57m	early	0.0249244	1.60654e-06	0.0382734	-0.033523	-0.0291624	covTest	Original	New
cg12529917	Physical/sexual abuse	81m	middle	0.0223557	2.27015e-06	0.0384403	-0.0252966	-0.0219287	covTest	Original	New
cg13925163	Physical/sexual abuse	81m	middle	0.0230118	3.56627e-06	0.0449993	-0.037185	-0.0229331	covTest	Original	New
cg26916020	Physical/sexual abuse	42m	early	0.0228712	2.17336e-06	0.0382734	-0.00724647	-0.0116045	covTest	Original	New
cg00489652	Physical/sexual abuse	81m	middle	0.0238051	1.34428e-06	0.0368952	-0.0175768	-0.0139144	covTest	Original	New
cg15801251	Physical/sexual abuse	69m	middle	0.022943	3.5774e-06	0.0449993	-0.00301146	-0.00376738	covTest	Original	New
cg00336022	Physical/sexual abuse	42m	early	0.0226684	3.17604e-06	0.0429502	0.0382237	0.0351325	covTest	Original	New
cg04087057	Physical/sexual abuse	81m	middle	0.0260628	1.42467e-06	0.0368952	-0.0191478	-0.0164558	covTest	Original	New
cg01084215	Physical/sexual abuse	57m	early	0.0247533	2.93697e-06	0.0429502	-0.0189129	-0.0327839	covTest	Original	New
cg18657751	Physical/sexual abuse	81m	middle	0.0213907	3.15639e-06	0.0429502	-0.0428952	-0.0389888	covTest	Original	New
cg01282906	Physical/sexual abuse	57m	early	0.0246229	6.64597e-07	0.0292593	-0.0251115	-0.0336344	covTest	Original	New
cg06430102	Physical/sexual abuse	30m	very early	0.0256853	1.10798e-06	0.0326531	-0.0357639	-0.0290711	covTest	Original	New
cg23930923	Physical/sexual abuse	42m	early	0.0295174	5.65025e-07	0.0276396	0.0209063	0.0649776	covTest	Original	New
cg16496526	Physical/sexual abuse	57m	early	0.0272187	3.15266e-07	0.0276396	0.00205395	0.00634275	covTest	Original	New
cg19810038	Physical/sexual abuse	57m	early	0.0219241	3.21939e-06	0.0429502	0.00273104	0.0165943	covTest	Original	New
cg22412747	Financial hardship	33m	very early	0.0239723	8.73056e-06	0.04133	0.0150826	0.0233444	covTest	Original	New
cg26797073	Financial hardship	7y	middle	0.0232296	4.80151e-06	0.0326798	-0.000800822	0.00100327	covTest	Original	New
cg02833127	Financial hardship	7y	middle	0.0216187	9.28833e-06	0.0421572	0.000144238	0.000705233	covTest	Original	New
cg13895461	Financial hardship	7y	middle	0.0223728	7.89578e-06	0.0395019	0.000131652	0.000290988	covTest	Original	New
cg08253296	Financial hardship	7y	middle	0.0212134	7.36877e-06	0.0386208	4.78812e-05	0.00230332	covTest	Original	New
cg21758832	Financial hardship	7y	middle	0.0284758	1.06187e-07	0.00424997	0.000389441	0.000719316	covTest	Original	New
cg12233363	Financial hardship	7y	middle	0.0235013	3.22061e-06	0.0265589	-0.00149023	0.0062485	covTest	Original	New
cg23819836	Financial hardship	7y	middle	0.0281096	3.81996e-07	0.00989273	-0.00527371	0.00166784	covTest	Original	New
cg15742123	Financial hardship	33m	very early	0.0199731	1.08235e-05	0.0456454	-0.0198531	-0.0160359	covTest	Original	New
cg08911368	Financial hardship	61m	early	0.0204542	7.80769e-06	0.0395019	0.0105224	0.00757132	covTest	Original	New
cg11217004	Financial hardship	7y	middle	0.0253204	1.04706e-05	0.0452218	0.000163176	0.000628613	covTest	Original	New
cg15942382	Financial hardship	7y	middle	0.0249954	6.34465e-07	0.0118076	-0.00102068	0.000767445	covTest	Original	New
cg03444715	Financial hardship	8m	very early	0.036034	1.7791e-08	0.00261087	0.00408036	0.00303191	covTest	Original	New
cg16638793	Financial hardship	7y	middle	0.0250063	2.42313e-06	0.0248093	-0.00503177	-0.00772317	covTest	Original	New
cg10281977	Financial hardship	33m	very early	0.0268882	4.35327e-06	0.0324841	0.00631478	0.00498593	covTest	Original	New
cg18451814	Financial hardship	21m	very early	0.0224453	1.0035e-06	0.0158889	0.0139995	0.00923927	covTest	Original	New
cg09753193	Financial hardship	7y	middle	0.0199073	8.5396e-06	0.0411	-0.00624754	-0.00636787	covTest	Original	New
cg13536060	Financial hardship	7y	middle	0.0210878	8.02126e-06	0.0396788	0.00376507	0.00779901	covTest	Original	New
cg16659026	Financial hardship	7y	middle	0.0222626	1.33003e-05	0.0483931	0.00143724	0.00110332	covTest	Original	New
cg01154966	Financial hardship	8m	very early	0.021731	6.21137e-06	0.0359816	0.0115343	0.00814201	covTest	Original	New
cg14535980	Financial hardship	21m	very early	0.0209654	7.3482e-06	0.0386208	0.00530115	0.00723082	covTest	Original	New
cg19079194	Financial hardship	7y	middle	0.0232166	7.85131e-06	0.0395019	1.96231e-05	0.00106403	covTest	Original	New
cg15029402	Financial hardship	8m	very early	0.0239532	1.78234e-06	0.0206497	-0.0132655	-0.0134394	covTest	Original	New
cg15720669	Financial hardship	7y	middle	0.0211948	8.95053e-06	0.0414793	0.000206607	0.000223225	covTest	Original	New
cg00849990	Financial hardship	33m	very early	0.0245556	1.47024e-06	0.0179801	0.0082074	0.0191497	covTest	Original	New
cg04317338	Financial hardship	7y	middle	0.0207153	1.13377e-05	0.0456454	0.000672438	0.000350368	covTest	Original	New
cg20193324	Financial hardship	7y	middle	0.0226764	3.85515e-06	0.0298719	0.000636917	0.00037708	covTest	Original	New
cg02203311	Financial hardship	7y	middle	0.0262364	9.06056e-07	0.0153422	0.00061931	0.000289451	covTest	Original	New
cg10864433	Financial hardship	8m	very early	0.0219129	9.24726e-06	0.0421572	0.00440862	0.00255042	covTest	Original	New
cg13482628	Financial hardship	7y	middle	0.0207881	6.36594e-06	0.0360267	0.000208858	0.000268823	covTest	Original	New
cg12214908	Financial hardship	7y	middle	0.0275274	1.46608e-06	0.0179801	-0.000400785	0.00237009	covTest	Original	New
cg06147822	Financial hardship	7y	middle	0.0229954	3.9072e-06	0.0298719	0.000357507	0.000427452	covTest	Original	New
cg21299458	Financial hardship	61m	early	0.0298516	4.32159e-08	0.00349705	0.0198634	0.0212121	covTest	Original	New
cg03447557	Financial hardship	7y	middle	0.0224178	1.14889e-05	0.0456454	-0.00336378	-0.0109542	covTest	Original	New
cg07224169	Financial hardship	33m	very early	0.0204132	5.6269e-06	0.035648	-0.00491674	-0.00616879	covTest	Original	New
cg13780428	Financial hardship	7y	middle	0.0234604	2.64581e-06	0.0255304	-0.000906971	-0.00605061	covTest	Original	New
cg14529268	Financial hardship	7y	middle	0.0216881	6.73369e-06	0.0370569	-0.00225896	-0.00418195	covTest	Original	New
cg16142957	Financial hardship	7y	middle	0.0247163	1.3557e-06	0.0179801	-0.00348955	-0.00589937	covTest	Original	New
cg17823943	Financial hardship	7y	middle	0.0250256	9.00759e-07	0.0153422	-0.00237726	-0.00499441	covTest	Original	New
cg24008892	Financial hardship	7y	middle	0.0195958	9.82062e-06	0.0436727	-0.00166571	-0.00433338	covTest	Original	New
cg01022012	Financial hardship	7y	middle	0.0313495	6.10094e-08	0.00360381	-0.0133249	-0.012295	covTest	Original	New
cg03123136	Financial hardship	7y	middle	0.0198203	1.15624e-05	0.0456454	-0.000430371	-0.00554866	covTest	Original	New
cg03173936	Financial hardship	8m	very early	0.0254137	3.11115e-06	0.0265589	-0.00729861	-0.00676868	covTest	Original	New
cg03564320	Financial hardship	7y	middle	0.0232671	7.87426e-06	0.0395019	0.0140157	0.0253669	covTest	Original	New
cg09686333	Financial hardship	7y	middle	0.0241688	6.38282e-06	0.0360267	-0.00012748	-0.00205436	covTest	Original	New
cg13028376	Financial hardship	8m	very early	0.0325656	3.48991e-07	0.00960287	-0.0110229	-0.0140662	covTest	Original	New
cg01087925	Financial hardship	7y	middle	0.0225868	1.23378e-05	0.0456454	-0.00466679	-0.0108799	covTest	Original	New
cg03448619	Financial hardship	7y	middle	0.0243169	4.82488e-06	0.0326798	-0.000935804	-0.00599622	covTest	Original	New
cg11759378	Financial hardship	33m	very early	0.023734	3.15563e-06	0.0265589	-0.0105149	-0.0112792	covTest	Original	New
cg18258502	Financial hardship	7y	middle	0.0214072	1.20779e-05	0.0456454	-0.00138726	-0.00401483	covTest	Original	New
cg00847387	Financial hardship	7y	middle	0.0229055	8.94161e-06	0.0414793	-0.002589	-0.004338	covTest	Original	New
cg11819342	Financial hardship	7y	middle	0.0212995	5.66797e-06	0.035648	-0.0129332	-0.00831769	covTest	Original	New
cg20098332	Financial hardship	21m	very early	0.025874	2.84369e-06	0.0262212	0.00169089	0.00217338	covTest	Original	New
cg27086807	Financial hardship	7y	middle	0.0233605	5.0821e-06	0.0339005	-0.000477143	-0.0019382	covTest	Original	New
cg07592353	Financial hardship	7y	middle	0.0192682	1.22885e-05	0.0456454	-0.0025225	-0.00290495	covTest	Original	New
cg17490981	Financial hardship	recency	recency	0.0254057	4.61511e-06	0.0326798	NA	NA	covTest	Original	New
cg18450832	Financial hardship	7y	middle	0.0329902	1.60176e-08	0.00261087	-0.00565724	-0.00636287	covTest	Original	New
cg24155123	Financial hardship	8m	very early	0.0239431	1.15167e-06	0.016901	0.0188267	0.022594	covTest	Original	New
cg27144115	Financial hardship	8m	very early	0.0220275	1.17524e-05	0.0456454	0.00155252	0.00672751	covTest	Original	New
cg27311041	Financial hardship	7y	middle	0.0293522	6.54855e-08	0.00360381	-0.000919474	-0.00372393	covTest	Original	New
cg01046905	Financial hardship	7y	middle	0.0229345	3.2576e-06	0.0265589	-0.00715504	-0.0174776	covTest	Original	New
cg03588325	Financial hardship	7y	middle	0.0236869	4.64751e-06	0.0326798	0.000359379	0.000857475	covTest	Original	New
cg12111808	Financial hardship	7y	middle	0.0210015	5.87074e-06	0.0359816	-0.000601866	-0.0028489	covTest	Original	New
cg16687649	Financial hardship	7y	middle	0.0247599	1.43933e-06	0.0179801	0.000394276	-0.00826781	covTest	Original	New
cg04386498	Financial hardship	7y	middle	0.0210229	4.59769e-06	0.0326798	-0.00462523	-0.00511954	covTest	Original	New
cg07572214	Financial hardship	7y	middle	0.0230123	6.43675e-07	0.0118076	-0.0179143	-0.0191274	covTest	Original	New
cg07829265	Financial hardship	7y	middle	0.0218233	1.19393e-05	0.0456454	-0.00160962	-0.00640056	covTest	Original	New
cg09445498	Financial hardship	7y	middle	0.0231816	1.83533e-06	0.0207184	-0.00586136	-0.0120853	covTest	Original	New
cg24929514	Financial hardship	7y	middle	0.0219165	5.93585e-06	0.0359816	-0.000115866	-0.00720177	covTest	Original	New
cg25150440	Financial hardship	7y	middle	0.0225447	1.19815e-05	0.0456454	-0.00393309	-0.00473921	covTest	Original	New
cg00611614	Financial hardship	7y	middle	0.0284696	2.96214e-07	0.00869402	-0.000778646	-0.00775536	covTest	Original	New
cg00651709	Financial hardship	8m	very early	0.023249	3.93536e-06	0.0298719	-0.0048285	-0.00484653	covTest	Original	New
cg01139761	Financial hardship	7y	middle	0.020901	7.16892e-06	0.0386208	0.00496681	-0.00397423	covTest	Original	New
cg23536138	Financial hardship	7y	middle	0.0215278	1.17084e-05	0.0456454	0.00157008	-0.00368922	covTest	Original	New
cg13672863	Financial hardship	7y	middle	0.0253506	5.14913e-07	0.0114811	-0.00118457	-0.00136368	covTest	Original	New
cg02879136	Financial hardship	7y	middle	0.0234795	1.04661e-06	0.0158889	-0.00081276	-0.00244639	covTest	Original	New
cg11531947	Financial hardship	33m	very early	0.0244338	1.74995e-06	0.0206497	-0.0071361	-0.00633511	covTest	Original	New
cg12513520	Financial hardship	7y	middle	0.0248284	2.40667e-06	0.0248093	-0.00539534	-0.00919515	covTest	Original	New
cg14636714	Financial hardship	7y	middle	0.0230389	9.8177e-06	0.0436727	-0.007652	-0.0127833	covTest	Original	New
cg14710459	Financial hardship	7y	middle	0.0196007	1.16913e-05	0.0456454	-0.0245298	-0.0158466	covTest	Original	New
cg19219503	Financial hardship	7y	middle	0.0262545	2.66753e-06	0.0255304	-0.0140388	-0.0187889	covTest	Original	New
cg24938210	Financial hardship	7y	middle	0.0217946	5.31607e-06	0.0344182	-0.00149914	-0.00907315	covTest	Original	New
cg26360968	Financial hardship	7y	middle	0.0276816	4.2573e-07	0.0104128	-0.00111124	-0.00328702	covTest	Original	New
cg04078163	Financial hardship	7y	middle	0.0227666	3.55062e-06	0.0284215	0.000223222	-0.00825303	covTest	Original	New
cg09580214	Financial hardship	8m	very early	0.0270676	5.21738e-07	0.0114811	-0.0124182	-0.0277382	covTest	Original	New
cg15298932	Financial hardship	7y	middle	0.0203893	1.04771e-05	0.0452218	0.000129475	-0.00347961	covTest	Original	New
cg16374193	Financial hardship	7y	middle	0.0303169	1.29411e-08	0.00261087	-0.00175991	-0.00754013	covTest	Original	New
cg16712438	Financial hardship	7y	middle	0.0272862	1.48424e-07	0.00466747	-0.00442461	-0.00796639	covTest	Original	New
cg19047670	Financial hardship	7y	middle	0.0209558	1.26222e-05	0.0463083	-0.00239271	-0.00827653	covTest	Original	New
cg10577630	Financial hardship	33m	very early	0.021854	6.698e-06	0.0370569	0.0438818	0.0303963	covTest	Original	New
cg11601443	Financial hardship	7y	middle	0.0247421	2.41885e-06	0.0248093	-0.00337036	-0.00504799	covTest	Original	New
cg11964314	Financial hardship	8m	very early	0.0218122	6.06204e-06	0.0359816	0.0177606	0.0185242	covTest	Original	New
cg19529621	Financial hardship	21m	very early	0.0219988	1.02941e-05	0.0452218	-0.0156886	-0.0207251	covTest	Original	New
cg20883310	Financial hardship	7y	middle	0.0258233	1.28699e-06	0.0177064	-0.00406458	-0.00565999	covTest	Original	New
cg23508701	Financial hardship	7y	middle	0.0213719	8.18936e-06	0.0400603	-0.00234407	-0.00268285	covTest	Original	New
cg02773671	Financial hardship	7y	middle	0.0208741	1.14646e-05	0.0456454	0.000828994	-0.00148752	covTest	Original	New
cg03337886	Financial hardship	7y	middle	0.0247319	2.85883e-06	0.0262212	-0.00757299	-0.0107622	covTest	Original	New
cg04753475	Financial hardship	7y	middle	0.0334663	2.57047e-08	0.00282917	-0.04796	-0.0265667	covTest	Original	New
cg08910625	Financial hardship	8m	very early	0.0274324	1.27753e-06	0.0177064	0.00259833	0.00316496	covTest	Original	New
cg02047319	Financial hardship	7y	middle	0.022733	2.54865e-06	0.0255014	-0.00165023	-0.00409226	covTest	Original	New
cg13155549	Financial hardship	7y	middle	0.032001	7.6354e-08	0.00373504	-0.00208019	-0.00733523	covTest	Original	New
cg18415147	Financial hardship	7y	middle	0.0211925	8.58861e-06	0.0411	0.00297998	-0.00543687	covTest	Original	New
cg25039966	Financial hardship	7y	middle	0.0233946	1.22159e-05	0.0456454	0.00257371	-0.00291041	covTest	Original	New
cg05899103	Financial hardship	33m	very early	0.0211904	5.22402e-06	0.0343271	-0.0385035	-0.0229278	covTest	Original	New
cg17100528	Financial hardship	7y	middle	0.0295237	1.16413e-07	0.00427097	-0.00137341	-0.00558798	covTest	Original	New
cg27384569	Financial hardship	7y	middle	0.0201534	1.179e-05	0.0456454	-0.00182681	-0.00741543	covTest	Original	New
cg03753454	Financial hardship	7y	middle	0.0225782	7.24922e-06	0.0386208	-0.00263695	-0.00829754	covTest	Original	New
cg16454349	Financial hardship	7y	middle	0.0207688	1.12331e-05	0.0456454	0.00200706	-0.00422625	covTest	Original	New
cg10851992	Financial hardship	8m	very early	0.0236674	3.14854e-06	0.0265589	0.000930322	0.00283673	covTest	Original	New
cg14050053	Financial hardship	8m	very early	0.0213868	4.79274e-06	0.0326798	0.00124748	0.00165393	covTest	Original	New
cg23332610	Financial hardship	7y	middle	0.0221538	1.18229e-05	0.0456454	-0.000361768	-0.00765872	covTest	Original	New
cg27025953	Financial hardship	7y	middle	0.0226123	2.03946e-06	0.0224472	-0.00900067	-0.0158053	covTest	Original	New
cg02806853	Financial hardship	7y	middle	0.0237895	5.47641e-07	0.0114811	-0.00332826	-0.00397416	covTest	Original	New
cg10821320	Financial hardship	7y	middle	0.0272345	5.8759e-07	0.0117587	-0.00487995	-0.00755492	covTest	Original	New
cg11654037	Financial hardship	7y	middle	0.0239615	3.08073e-06	0.0265589	8.81433e-05	-0.00613829	covTest	Original	New
cg18094693	Financial hardship	7y	middle	0.025589	1.03071e-06	0.0158889	-0.0173658	-0.0156361	covTest	Original	New
cg25258938	Financial hardship	7y	middle	0.0317751	9.12114e-08	0.00401564	-0.0190854	-0.0125734	covTest	Original	New
cg26802755	Financial hardship	accumulation	accumulation	0.0352874	4.76592e-08	0.00349705	NA	NA	covTest	Original	New
cg05060427	Financial hardship	7y	middle	0.0244819	6.17974e-06	0.0359816	-0.00268123	-0.00791304	covTest	Original	New
cg05386230	Financial hardship	7y	middle	0.0268213	1.3919e-07	0.00466747	0.000202731	0.00608731	covTest	Original	New
cg06080194	Financial hardship	7y	middle	0.0217042	6.16602e-06	0.0359816	-0.0284935	-0.0172656	covTest	Original	New
cg22871801	Maternal psychopathology	8m	very early	0.0214493	5.6169e-06	0.0379395	-0.00821389	-0.00850031	covTest	Original	New
cg15122171	Maternal psychopathology	61m	early	0.023712	3.57873e-06	0.0335225	0.0146278	0.0130151	covTest	Original	New
cg05526015	Maternal psychopathology	61m	early	0.0253142	9.30501e-07	0.0175254	-0.0101657	-0.00958493	covTest	Original	New
cg10787409	Maternal psychopathology	8m	very early	0.0263139	9.2722e-07	0.0175254	-0.0086714	-0.00849684	covTest	Original	New
cg04583813	Maternal psychopathology	8m	very early	0.0319702	5.46239e-08	0.00396751	-0.0152794	-0.0162968	covTest	Original	New
cg15229052	Maternal psychopathology	6y	middle	0.0253064	1.63452e-07	0.00601267	-0.00578402	-0.00894745	covTest	Original	New
cg02399044	Maternal psychopathology	61m	early	0.0239769	1.02145e-06	0.0175254	-0.00395758	-0.00350159	covTest	Original	New
cg13131577	Maternal psychopathology	8m	very early	0.0260121	6.65606e-07	0.0175254	-0.00190948	-0.00226022	covTest	Original	New
cg01517364	Maternal psychopathology	8m	very early	0.0255655	2.79059e-06	0.0279222	-0.00988372	-0.0146738	covTest	Original	New
cg10506057	Maternal psychopathology	61m	early	0.0237658	1.87809e-06	0.0229679	-0.00797688	-0.0118084	covTest	Original	New
cg21818807	Maternal psychopathology	8m	very early	0.0243254	7.68073e-06	0.0476267	-0.00248843	-0.00374784	covTest	Original	New
cg16313382	Maternal psychopathology	accumulation	accumulation	0.0220423	1.47825e-06	0.0200864	NA	NA	covTest	Original	New
cg21807034	Maternal psychopathology	61m	early	0.0313157	4.77588e-08	0.00396751	-0.00345865	-0.00709053	covTest	Original	New
cg15697355	Maternal psychopathology	8m	very early	0.0322026	6.809e-08	0.00396751	-0.00870689	-0.0103866	covTest	Original	New
cg20273358	Maternal psychopathology	61m	early	0.0248872	7.07505e-06	0.0451426	-0.0104488	-0.012419	covTest	Original	New
cg20852851	Maternal psychopathology	61m	early	0.0199589	4.48815e-06	0.0346656	-0.00459681	-0.0051445	covTest	Original	New
cg16999122	Maternal psychopathology	8m	very early	0.0219248	2.1894e-06	0.0260513	-0.00469336	-0.0025782	covTest	Original	New
cg07338058	Maternal psychopathology	33m	very early	0.0249124	1.17111e-06	0.0175832	0.00110689	0.000917315	covTest	Original	New
cg10964367	Maternal psychopathology	21m	very early	0.025985	2.572e-07	0.00808815	0.0020546	0.00198353	covTest	Original	New
cg01776299	Maternal psychopathology	8m	very early	0.023267	9.90133e-07	0.0175254	-0.0247067	-0.0348557	covTest	Original	New
cg05752207	Maternal psychopathology	61m	early	0.0253188	1.1146e-06	0.0175254	-0.00319269	-0.00715991	covTest	Original	New
cg19646139	Maternal psychopathology	61m	early	0.0206203	4.28648e-06	0.0342634	-0.00911496	-0.00870001	covTest	Original	New
cg21930061	Maternal psychopathology	61m	early	0.0218724	1.55123e-06	0.0200864	-0.0112883	-0.00936511	covTest	Original	New
cg24249925	Maternal psychopathology	61m	early	0.0231181	1.11415e-06	0.0175254	-0.00595781	-0.00728487	covTest	Original	New
cg24462001	Maternal psychopathology	21m	very early	0.0248357	1.07465e-06	0.0175254	-0.012264	-0.0179808	covTest	Original	New
cg04218520	Maternal psychopathology	6y	middle	0.0210946	5.77378e-06	0.0379395	-0.00343575	-0.00480958	covTest	Original	New
cg04491917	Maternal psychopathology	8m	very early	0.0246728	5.41569e-06	0.0379395	-0.0239925	-0.018831	covTest	Original	New
cg12072024	Maternal psychopathology	61m	early	0.0244238	9.8745e-07	0.0175254	-0.0415869	-0.0157243	covTest	Original	New
cg13301733	Maternal psychopathology	8m	very early	0.0219049	4.35825e-06	0.0342634	-0.00971361	-0.0129243	covTest	Original	New
cg14478422	Maternal psychopathology	8m	very early	0.0207275	7.98285e-06	0.0488126	-0.0112191	-0.0120591	covTest	Original	New
cg19496479	Maternal psychopathology	61m	early	0.0210434	7.20942e-06	0.0453428	-0.00697874	-0.0110477	covTest	Original	New
cg23744372	Maternal psychopathology	8m	very early	0.0227965	4.28809e-06	0.0342634	-0.00859617	-0.0121794	covTest	Original	New
cg25500616	Maternal psychopathology	61m	early	0.0201952	4.0417e-06	0.0342634	-0.00840383	-0.00794288	covTest	Original	New
cg26480091	Maternal psychopathology	61m	early	0.027853	2.53792e-07	0.00808815	-0.0162176	-0.0192217	covTest	Original	New
cg14611230	Maternal psychopathology	accumulation	accumulation	0.0221801	2.67556e-06	0.0278552	NA	NA	covTest	Original	New
cg26039484	Maternal psychopathology	61m	early	0.0234256	5.19893e-06	0.0379395	-0.0220882	-0.0288901	covTest	Original	New
cg26764579	Maternal psychopathology	61m	early	0.026101	1.0033e-06	0.0175254	-0.00646103	-0.00952607	covTest	Original	New
cg19508985	Maternal psychopathology	61m	early	0.0212359	5.72007e-06	0.0379395	-0.00350622	-0.00795243	covTest	Original	New
cg27410449	Maternal psychopathology	61m	early	0.0251052	7.91776e-07	0.0175254	-0.0222046	-0.0318129	covTest	Original	New
cg00707406	Maternal psychopathology	6y	middle	0.0310678	9.822e-09	0.00396751	-0.0117481	-0.0289374	covTest	Original	New
cg11860091	Maternal psychopathology	8m	very early	0.0241566	1.19815e-06	0.0175832	-0.00134098	-0.00735593	covTest	Original	New
cg21949355	Maternal psychopathology	6y	middle	0.0263994	9.01181e-08	0.00396751	-0.0359405	-0.0233885	covTest	Original	New
cg15193282	Maternal psychopathology	6y	middle	0.0258212	3.87419e-06	0.0342634	-0.0224931	-0.0163018	covTest	Original	New
cg22659852	Maternal psychopathology	8m	very early	0.0210565	2.61937e-06	0.0278552	-0.00464295	-0.00959021	covTest	Original	New
cg01302119	Maternal psychopathology	8m	very early	0.023069	3.22044e-06	0.0308222	-0.00508307	-0.0119288	covTest	Original	New
cg05998950	Maternal psychopathology	61m	early	0.0205861	5.41623e-06	0.0379395	-0.00448923	-0.00540589	covTest	Original	New
cg19837112	Maternal psychopathology	recency	recency	0.0251796	3.8625e-06	0.0342634	NA	NA	covTest	Original	New
cg24734300	Maternal psychopathology	61m	early	0.026537	1.63886e-07	0.00601267	-0.00722451	-0.0086382	covTest	Original	New
cg14688129	Maternal psychopathology	61m	early	0.0195527	6.82413e-06	0.0441819	-0.00656726	-0.00918429	covTest	Original	New
cg14783123	Maternal psychopathology	61m	early	0.028467	8.4561e-08	0.00396751	-0.0134483	-0.0139542	covTest	Original	New
cg25597843	Maternal psychopathology	61m	early	0.0304695	4.02306e-08	0.00396751	-0.00852993	-0.00766322	covTest	Original	New
cg17598190	Maternal psychopathology	33m	very early	0.021576	5.63569e-06	0.0379395	-0.00503633	-0.00647379	covTest	Original	New
cg03178489	Maternal psychopathology	61m	early	0.0260868	6.28134e-08	0.00396751	-0.0118872	-0.0115686	covTest	Original	New
cg04445570	Maternal psychopathology	61m	early	0.0334693	2.27682e-08	0.00396751	-0.00819365	-0.00715792	covTest	Original	New
cg10006235	Maternal psychopathology	61m	early	0.0225116	2.9906e-06	0.0292585	-0.015597	-0.021715	covTest	Original	New
cg20784531	Maternal psychopathology	8m	very early	0.0204132	4.28717e-06	0.0342634	-0.0210487	-0.0115244	covTest	Original	New
cg22994018	Maternal psychopathology	61m	early	0.0239553	2.70698e-06	0.0278552	-0.0246807	-0.0332675	covTest	Original	New
cg23130075	Maternal psychopathology	61m	early	0.0233283	2.65256e-06	0.0278552	-0.0404638	-0.0320852	covTest	Original	New
cg24299074	Maternal psychopathology	61m	early	0.0233144	5.35665e-06	0.0379395	-0.0083376	-0.0133539	covTest	Original	New
cg07301061	Maternal psychopathology	61m	early	0.0213453	8.11577e-06	0.0489456	-0.014638	-0.0167766	covTest	Original	New
cg08660562	Maternal psychopathology	21m	very early	0.02497	4.35524e-06	0.0342634	-0.0141143	-0.0216593	covTest	Original	New
cg09741995	Maternal psychopathology	61m	early	0.0230211	7.35192e-07	0.0175254	-0.0274842	-0.0231871	covTest	Original	New
cg25820033	Maternal psychopathology	61m	early	0.0196989	5.27884e-06	0.0379395	-0.00372824	-0.00652228	covTest	Original	New
cg00827893	Maternal psychopathology	21m	very early	0.0237973	7.7356e-07	0.0175254	-0.0152524	-0.0128364	covTest	Original	New
cg00887586	Maternal psychopathology	61m	early	0.0208247	5.59659e-06	0.0379395	-0.0113652	-0.0116059	covTest	Original	New
cg17806989	Maternal psychopathology	61m	early	0.0267212	1.7862e-06	0.0224682	-0.00431305	-0.00539317	covTest	Original	New
cg21169357	Maternal psychopathology	61m	early	0.0281554	7.43339e-08	0.00396751	-0.0108661	-0.0171334	covTest	Original	New
cg20603888	Maternal psychopathology	61m	early	0.0257214	1.26631e-06	0.017984	-0.00695833	-0.00537808	covTest	Original	New
cg00185122	Maternal psychopathology	61m	early	0.0228012	1.51484e-06	0.0200864	-0.00684119	-0.00600511	covTest	Original	New
cg04028616	Maternal psychopathology	61m	early	0.0225311	2.72063e-06	0.0278552	-0.0168219	-0.0132622	covTest	Original	New
cg18263969	Maternal psychopathology	61m	early	0.0210389	2.40699e-06	0.0278552	-0.00563284	-0.00741394	covTest	Original	New
cg00092711	Maternal psychopathology	61m	early	0.0258096	4.0848e-06	0.0342634	-0.0204865	-0.0198552	covTest	Original	New
cg06607089	Maternal psychopathology	61m	early	0.0262114	1.06086e-06	0.0175254	-0.0239132	-0.0315146	covTest	Original	New
cg11159141	Neighborhood disadvantage	21m	very early	0.0245195	1.36106e-06	0.0474174	0.00173394	0.00701305	covTest	Original	New
cg02335370	Neighborhood disadvantage	7y	middle	0.0241862	1.68222e-06	0.0474174	0.00189853	0.00287489	covTest	Original	New
cg04007726	Neighborhood disadvantage	7y	middle	0.0379157	3.44246e-09	0.00151557	0.000640614	-8.75955e-05	covTest	Original	New
cg06312776	Neighborhood disadvantage	21m	very early	0.02436	4.12282e-07	0.0362538	0.000217318	0.000533578	covTest	Original	New
cg18262852	Neighborhood disadvantage	21m	very early	0.0229689	1.2689e-06	0.0474174	0.00445626	0.0203404	covTest	Original	New
cg15986841	Neighborhood disadvantage	21m	very early	0.0250237	5.52606e-07	0.0362538	0.00289334	0.00944535	covTest	Original	New
cg11945167	Neighborhood disadvantage	21m	very early	0.0252718	3.08648e-07	0.0362538	-0.00563512	-0.00596341	covTest	Original	New
cg21249376	Neighborhood disadvantage	7y	middle	0.0236916	1.97155e-06	0.0474174	0.000283113	-5.37937e-05	covTest	Original	New
cg16723134	Neighborhood disadvantage	21m	very early	0.0232857	2.1661e-06	0.0476821	0.000729968	0.000119428	covTest	Original	New
cg00715047	Neighborhood disadvantage	7y	middle	0.0203336	1.87768e-06	0.0474174	0.000353194	-0.00013	covTest	Original	New
cg05014211	Neighborhood disadvantage	61m	early	0.023456	5.76429e-07	0.0362538	-0.00102132	-0.000623545	covTest	Original	New
cg27582546	Neighborhood disadvantage	21m	very early	0.0228629	1.70611e-06	0.0474174	-0.00808562	-0.00551579	covTest	Original	New
cg24360745	Neighborhood disadvantage	21m	very early	0.0209528	1.28015e-06	0.0474174	-0.00623612	0.00108533	covTest	Original	New
cg13728386	Neighborhood disadvantage	21m	very early	0.0244299	1.49312e-06	0.0474174	-0.0140827	-0.00269603	covTest	Original	New
cg16309325	Neighborhood disadvantage	7y	middle	0.0269348	7.62026e-07	0.0419359	0.00208665	0.000338533	covTest	Original	New
cg07670389	Neighborhood disadvantage	recency	recency	0.0219353	1.46893e-06	0.0474174	NA	NA	covTest	Original	New
cg10260192	Neighborhood disadvantage	7y	middle	0.0226502	1.92959e-06	0.0474174	-0.00542421	-0.00882441	covTest	Original	New
cg19176559	Neighborhood disadvantage	33m	very early	0.0227536	5.72475e-07	0.0362538	0.000710866	-0.00071291	covTest	Original	New
cg24181914	Neighborhood disadvantage	33m	very early	0.0214421	2.04637e-06	0.0474174	-0.00368682	-0.0092499	covTest	Original	New
cg07127410	Neighborhood disadvantage	33m	very early	0.0254478	5.3384e-07	0.0362538	-0.000507078	-0.000550234	covTest	Original	New
cg03397307	One adult household	33m	very early	0.0270051	1.03571e-07	0.0151993	0.00252432	0.00142166	covTest	Original	New
cg00654159	One adult household	47m	early	0.0226236	5.73197e-07	0.0360506	-0.0192991	-0.0355743	covTest	Original	New
cg12597983	One adult household	7y	middle	0.0251868	3.09398e-07	0.0263283	0.00874342	0.00546816	covTest	Original	New
cg24468070	One adult household	21m	very early	0.0338007	3.68291e-10	0.000162143	0.0131543	0.00487295	covTest	Original	New
cg04392284	One adult household	21m	very early	0.0300124	8.52177e-08	0.0151993	-0.012504	-0.0186938	covTest	Original	New
cg11430259	One adult household	33m	very early	0.0261577	3.58813e-07	0.0263283	0.0273731	0.0342231	covTest	Original	New
cg25069010	One adult household	33m	very early	0.0251488	1.99815e-07	0.0219925	-0.00985559	-0.0128111	covTest	Original	New
cg19825600	Caregiver physical/emotional abuse	6y	middle	0.0304412	8.01916e-09	0.00176525	-0.0605364	-0.0770785	covTest	Original	New
cg06777516	Caregiver physical/emotional abuse	33m	very early	0.0234309	8.22213e-07	0.0404011	0.018197	0.0202454	covTest	Original	New
cg23215014	Caregiver physical/emotional abuse	6y	middle	0.0219464	9.17672e-07	0.0404011	-0.00234248	-0.00093226	covTest	Original	New
cg12023170	Caregiver physical/emotional abuse	6y	middle	0.0469463	3.92131e-13	1.72638e-07	0.0119531	0.0297873	covTest	Original	New
cg17004733	Caregiver physical/emotional abuse	8m	very early	0.0282452	8.94992e-07	0.0404011	-0.0790048	-0.0598912	covTest	Original	New
cg16639145	Caregiver physical/emotional abuse	33m	very early	0.0252077	7.17846e-07	0.0404011	-0.0193053	-0.0150655	covTest	Original	New
cg01915822	Caregiver physical/emotional abuse	8m	very early	0.0274262	4.9713e-08	0.00547163	-0.0248559	-0.0139428	covTest	Original	New
cg12003463	Caregiver physical/emotional abuse	8m	very early	0.0302032	1.64993e-08	0.00242131	-0.0283247	-0.0277961	covTest	Original	New
cg10924080	Caregiver physical/emotional abuse	8m	very early	0.0287908	7.02358e-08	0.00618436	-0.0164671	-0.0182113	covTest	Original	New
cg09470638	Caregiver physical/emotional abuse	recency	recency	0.03036	2.08188e-07	0.015276	NA	NA	covTest	Original	New
cg00009916	Family instability	42m	early	0.0202901	1.57161e-05	0.03949	-0.00231684	-0.00169013	covTest	Original	New
cg06035702	Family instability	18m	very early	0.0223566	9.31935e-06	0.0307462	0.00376751	0.00217487	covTest	Original	New
cg07025650	Family instability	69m	middle	0.0236827	4.95089e-06	0.025919	-0.0122501	-0.0158196	covTest	Original	New
cg15046712	Family instability	81m	middle	0.0215112	6.91302e-06	0.0283915	0.0300644	0.062248	covTest	Original	New
cg19091930	Family instability	recency	recency	0.0262396	5.00415e-06	0.025919	NA	NA	covTest	Original	New
cg00406022	Family instability	69m	middle	0.0217846	8.38324e-06	0.0295288	-0.0306791	-0.0386117	covTest	Original	New
cg20942691	Family instability	69m	middle	0.0221697	7.83082e-06	0.0287298	-0.00530118	-0.00516302	covTest	Original	New
cg13710308	Family instability	accumulation	accumulation	0.0261822	7.46018e-06	0.0287298	NA	NA	covTest	Original	New
cg20384632	Family instability	81m	middle	0.0239232	1.43207e-06	0.0128669	-0.00834946	-0.00604758	covTest	Original	New
cg11803843	Family instability	30m	very early	0.0211342	6.96257e-06	0.0283915	-0.00273934	-0.00259301	covTest	Original	New
cg05063138	Family instability	57m	early	0.0223385	3.53639e-06	0.022564	0.00294944	0.00159443	covTest	Original	New
cg08824610	Family instability	81m	middle	0.0261782	3.27672e-06	0.0218575	-0.0237714	-0.0351572	covTest	Original	New
cg08856842	Family instability	57m	early	0.0186393	1.2967e-05	0.0354584	-0.0201743	-0.0280641	covTest	Original	New
cg01407460	Family instability	57m	early	0.0356786	1.03476e-09	0.000179459	-0.00248197	-0.00394375	covTest	Original	New
cg07313523	Family instability	30m	very early	0.0201399	1.6085e-05	0.039784	0.00492334	0.00236666	covTest	Original	New
cg00910503	Family instability	57m	early	0.0207657	1.91134e-05	0.0431464	-0.00809852	-0.00764277	covTest	Original	New
cg13375248	Family instability	81m	middle	0.0302922	1.97601e-07	0.00419307	-0.00816529	-0.00729334	covTest	Original	New
cg19475258	Family instability	18m	very early	0.0209665	1.87663e-05	0.0429956	-0.00613479	-0.00885539	covTest	Original	New
cg01587190	Family instability	57m	early	0.0316339	1.65374e-08	0.00091009	0.00232671	0.00658225	covTest	Original	New
cg25497487	Family instability	81m	middle	0.0286847	5.15534e-07	0.00709273	-0.0062219	-0.00489871	covTest	Original	New
cg24412204	Family instability	57m	early	0.025323	6.40524e-07	0.00783389	-0.0296211	-0.0335316	covTest	Original	New
cg10035294	Family instability	81m	middle	0.023887	1.08731e-05	0.0337111	0.00736073	0.00394364	covTest	Original	New
cg17892159	Family instability	57m	early	0.0223827	8.38397e-06	0.0295288	0.00572318	0.00361325	covTest	Original	New
cg02792740	Family instability	69m	middle	0.0191227	2.15697e-05	0.0453267	0.0374284	0.0145182	covTest	Original	New
cg17995050	Family instability	69m	middle	0.0217225	3.80941e-06	0.0229915	-0.0390342	-0.0515373	covTest	Original	New
cg16810605	Family instability	69m	middle	0.0232098	7.94462e-07	0.00874418	0.00848664	0.00526704	covTest	Original	New
cg17167425	Family instability	57m	early	0.0227779	1.9857e-05	0.0441523	-0.0238161	-0.0339484	covTest	Original	New
cg13459498	Family instability	42m	early	0.029512	2.44989e-07	0.00449408	0.00851608	0.0034273	covTest	Original	New
cg00197028	Family instability	81m	middle	0.0178253	1.94952e-05	0.043568	-0.027009	-0.0196092	covTest	Original	New
cg00759301	Family instability	57m	early	0.0187349	1.57784e-05	0.03949	-0.0218862	-0.0248941	covTest	Original	New
cg00875272	Family instability	69m	middle	0.0203084	1.8809e-05	0.0429956	0.00349949	0.00365346	covTest	Original	New
cg03593336	Family instability	57m	early	0.020814	1.15868e-05	0.0341724	0.0151076	0.0449372	covTest	Original	New
cg04145287	Family instability	69m	middle	0.0206038	2.53973e-05	0.0496949	0.00251018	0.00436742	covTest	Original	New
cg04215950	Family instability	30m	very early	0.0240344	3.64919e-06	0.0229511	-0.0379584	-0.0277205	covTest	Original	New
cg04310074	Family instability	57m	early	0.0221948	1.52195e-05	0.0394147	-0.0133361	-0.0144443	covTest	Original	New
cg05263382	Family instability	81m	middle	0.0217399	6.96476e-06	0.0283915	-0.0173904	-0.0175963	covTest	Original	New
cg06212760	Family instability	30m	very early	0.0260292	4.58866e-07	0.00681548	-0.015238	-0.0181649	covTest	Original	New
cg06770536	Family instability	69m	middle	0.0283466	4.61685e-07	0.00681548	-0.0360766	-0.0456287	covTest	Original	New
cg07117596	Family instability	57m	early	0.0199757	6.33075e-06	0.0283915	-0.0154811	-0.0119704	covTest	Original	New
cg10974027	Family instability	57m	early	0.0205409	9.10583e-06	0.0307462	-0.0175925	-0.0120109	covTest	Original	New
cg18533525	Family instability	57m	early	0.0236195	2.1668e-06	0.0170348	-0.0156749	-0.0180096	covTest	Original	New
cg22346081	Family instability	57m	early	0.0223442	2.54499e-06	0.0191688	-0.0130282	-0.0160714	covTest	Original	New
cg24048361	Family instability	57m	early	0.0208295	1.24013e-05	0.0349513	-0.0101474	-0.0134518	covTest	Original	New
cg25035939	Family instability	57m	early	0.0199547	1.69079e-05	0.0406477	-0.0115722	-0.0122572	covTest	Original	New
cg26362272	Family instability	57m	early	0.0213634	9.12922e-06	0.0307462	0.0035504	0.0236714	covTest	Original	New
cg26513818	Family instability	57m	early	0.0222549	7.57633e-06	0.0287298	-0.0124344	-0.0135392	covTest	Original	New
cg27138018	Family instability	57m	early	0.0188995	2.15355e-05	0.0453267	0.00138942	0.0063759	covTest	Original	New
ch.1.2582316R	Family instability	57m	early	0.0206342	2.45993e-06	0.019	0.00169743	0.00350214	covTest	Original	New
cg01791778	Family instability	57m	early	0.0221053	7.4225e-06	0.0287298	-0.0593853	-0.0537713	covTest	Original	New
cg02567476	Family instability	57m	early	0.0192294	1.85425e-05	0.0429657	-0.0149172	-0.0193538	covTest	Original	New
cg02599390	Family instability	57m	early	0.0190901	1.51187e-05	0.0393853	-0.015367	-0.0320787	covTest	Original	New
cg06856378	Family instability	57m	early	0.0236754	4.25216e-06	0.0240664	-0.0368021	-0.0241595	covTest	Original	New
cg08698580	Family instability	57m	early	0.0218516	1.03743e-05	0.0326239	-0.0141635	-0.011952	covTest	Original	New
cg09353931	Family instability	69m	middle	0.0237435	7.79717e-06	0.0287298	-0.0274718	-0.0227161	covTest	Original	New
cg12671030	Family instability	81m	middle	0.019848	2.31408e-05	0.0469488	0.00374929	0.00602627	covTest	Original	New
cg13613174	Family instability	18m	very early	0.0210574	2.16743e-05	0.0453267	-0.0287897	-0.0306863	covTest	Original	New
cg14948379	Family instability	57m	early	0.0239267	1.74368e-06	0.0142161	-0.0260431	-0.0251667	covTest	Original	New
cg15294115	Family instability	57m	early	0.024222	2.67722e-06	0.0193223	-0.0172722	-0.0211786	covTest	Original	New
cg17134302	Family instability	57m	early	0.0310094	6.01403e-08	0.00220643	-0.0144867	-0.0148195	covTest	Original	New
cg20548977	Family instability	57m	early	0.0220085	1.45403e-05	0.0385631	-0.0257435	-0.0251986	covTest	Original	New
cg21484910	Family instability	57m	early	0.0189061	1.92086e-05	0.0431464	-0.0144064	-0.0128567	covTest	Original	New
cg22060367	Family instability	57m	early	0.0274163	2.13404e-07	0.00427057	-0.0163124	-0.0178976	covTest	Original	New
cg22903457	Family instability	57m	early	0.0222404	1.13129e-05	0.0341597	-0.00770458	-0.0290021	covTest	Original	New
cg24303806	Family instability	57m	early	0.0277365	2.24765e-07	0.00430237	-0.0185521	-0.0141591	covTest	Original	New
cg27637303	Family instability	30m	very early	0.0214421	2.97036e-06	0.0204331	0.0461185	0.0356849	covTest	Original	New
cg02725556	Family instability	57m	early	0.022629	4.31616e-06	0.0240664	-0.0136982	-0.0121309	covTest	Original	New
cg08678930	Family instability	57m	early	0.0204135	2.35501e-05	0.04756	0.00601944	0.0159661	covTest	Original	New
cg11845045	Family instability	57m	early	0.0215625	1.59073e-05	0.0395667	-0.0140831	-0.0122099	covTest	Original	New
cg13666648	Family instability	57m	early	0.0216964	3.17161e-06	0.0214819	-0.0250659	-0.0351483	covTest	Original	New
cg14843888	Family instability	30m	very early	0.0206358	1.0624e-05	0.0331724	-0.0360099	-0.0269977	covTest	Original	New
cg16016506	Family instability	57m	early	0.0234507	2.66248e-06	0.0193223	-0.0203166	-0.0141233	covTest	Original	New
cg18690922	Family instability	57m	early	0.0212873	5.95513e-06	0.0281699	-0.00802301	-0.0119128	covTest	Original	New
cg20387392	Family instability	57m	early	0.0186438	2.17235e-05	0.0453267	-0.0101487	-0.012487	covTest	Original	New
cg21176488	Family instability	57m	early	0.022052	5.37904e-06	0.0268071	-0.0137919	-0.0167596	covTest	Original	New
cg21178333	Family instability	57m	early	0.0198545	5.86037e-06	0.0281699	-0.00804874	-0.00989625	covTest	Original	New
cg22793735	Family instability	69m	middle	0.018608	1.45329e-05	0.0385631	0.00156373	0.00227021	covTest	Original	New
cg11047796	Family instability	57m	early	0.0206844	1.71291e-05	0.0407633	-0.0153116	-0.0141645	covTest	Original	New
cg12572049	Family instability	30m	very early	0.0217246	2.15951e-05	0.0453267	0.00337286	0.00305643	covTest	Original	New
cg19903738	Family instability	57m	early	0.0243062	6.4058e-07	0.00783389	-0.0267423	-0.0354371	covTest	Original	New
cg27221631	Family instability	57m	early	0.0185599	9.04283e-06	0.0307462	-0.0109464	-0.0148151	covTest	Original	New
cg00975971	Family instability	57m	early	0.0244024	1.23827e-06	0.0120499	-0.0204147	-0.0170947	covTest	Original	New
cg01100868	Family instability	57m	early	0.0243078	2.73015e-06	0.0193841	-0.0134905	-0.0109666	covTest	Original	New
cg01159294	Family instability	57m	early	0.0195908	1.84553e-05	0.0429657	-0.0160992	-0.0203622	covTest	Original	New
cg02053188	Family instability	57m	early	0.0223398	7.70119e-06	0.0287298	0.00455188	0.0185831	covTest	Original	New
cg04830357	Family instability	81m	middle	0.0205162	2.24736e-05	0.0462345	0.0128549	0.056179	covTest	Original	New
cg05556461	Family instability	57m	early	0.0202615	2.53703e-05	0.0496949	-0.0182918	-0.0318919	covTest	Original	New
cg05599825	Family instability	57m	early	0.0195253	2.36797e-05	0.0476035	0.00189059	0.00343643	covTest	Original	New
cg08778123	Family instability	81m	middle	0.0235289	4.55032e-06	0.0247322	-0.021477	-0.0272371	covTest	Original	New
cg12659009	Family instability	57m	early	0.0210346	1.88484e-05	0.0429956	-0.0315892	-0.0403466	covTest	Original	New
cg14065590	Family instability	57m	early	0.0208187	6.00137e-06	0.0281699	-0.0433708	-0.0375471	covTest	Original	New
cg15384589	Family instability	57m	early	0.0224004	6.5334e-06	0.0283915	-0.0134327	-0.0127462	covTest	Original	New
cg16338178	Family instability	57m	early	0.0242609	3.22591e-07	0.00546243	-0.014675	-0.0194026	covTest	Original	New
cg16555188	Family instability	57m	early	0.029077	1.2924e-07	0.00355616	-0.0121708	-0.0158304	covTest	Original	New
cg17373554	Family instability	57m	early	0.019442	8.60951e-06	0.0300825	0.00938246	0.0237058	covTest	Original	New
cg22450878	Family instability	57m	early	0.0215033	6.22747e-06	0.0283915	-0.0166495	-0.0218344	covTest	Original	New
cg26337290	Family instability	57m	early	0.0209433	1.74389e-05	0.0408854	-0.0217702	-0.0263387	covTest	Original	New
cg27639644	Family instability	57m	early	0.0232921	4.63393e-06	0.0247718	-0.0271299	-0.0283371	covTest	Original	New
ch.5.115380F	Family instability	57m	early	0.0210617	9.26287e-06	0.0307462	0.00143055	0.00252007	covTest	Original	New
cg00294572	Family instability	57m	early	0.0196839	1.17205e-05	0.0341724	0.00362408	0.00688462	covTest	Original	New
cg00943585	Family instability	57m	early	0.0318017	4.49568e-08	0.00179932	-0.0289795	-0.0430459	covTest	Original	New
cg01812434	Family instability	69m	middle	0.0221469	1.69882e-05	0.0406477	-0.0545433	-0.0408704	covTest	Original	New
cg03512499	Family instability	81m	middle	0.0196188	7.67387e-06	0.0287298	0.00513735	0.0177588	covTest	Original	New
cg04138171	Family instability	57m	early	0.0203193	1.47172e-05	0.0387984	-0.00877685	-0.0110582	covTest	Original	New
cg07492590	Family instability	57m	early	0.0213057	2.21248e-05	0.0459462	-0.0179606	-0.0165901	covTest	Original	New
cg08183291	Family instability	57m	early	0.0195648	1.69587e-05	0.0406477	0.00343722	0.00393599	covTest	Original	New
cg16611696	Family instability	57m	early	0.0220152	1.57868e-05	0.03949	-0.0175236	-0.0194056	covTest	Original	New
cg16633701	Family instability	57m	early	0.0215177	9.49782e-06	0.0307462	-0.0182549	-0.018097	covTest	Original	New
cg17077639	Family instability	57m	early	0.0192598	2.09249e-05	0.0453267	0.000738606	0.00834711	covTest	Original	New
cg20266593	Family instability	recency	recency	0.0226082	1.17997e-06	0.0118066	NA	NA	covTest	Original	New
cg27061903	Family instability	57m	early	0.0256093	7.85218e-07	0.00874418	0.00313938	0.012278	covTest	Original	New
ch.6.1238048R	Family instability	81m	middle	0.0247796	4.3338e-06	0.0240664	0.00539311	0.00930068	covTest	Original	New
cg00190162	Family instability	57m	early	0.019026	1.56997e-05	0.03949	-0.012528	-0.0246372	covTest	Original	New
cg02886132	Family instability	57m	early	0.0215101	1.38308e-05	0.0373564	-0.0222065	-0.0174525	covTest	Original	New
cg05354171	Family instability	81m	middle	0.0202632	6.01461e-06	0.0281699	0.0064579	0.0187745	covTest	Original	New
cg06740985	Family instability	57m	early	0.0227793	7.52407e-06	0.0287298	-0.0159952	-0.0192969	covTest	Original	New
cg10076395	Family instability	57m	early	0.0203792	1.62904e-05	0.0400669	-0.012184	-0.0160284	covTest	Original	New
cg10374962	Family instability	57m	early	0.0257217	4.53486e-07	0.00681548	-0.0129428	-0.0126522	covTest	Original	New
cg10571837	Family instability	57m	early	0.0222816	7.25606e-06	0.0287298	-0.00982145	-0.0130888	covTest	Original	New
cg17719337	Family instability	69m	middle	0.030432	1.89005e-08	0.000924563	0.003912	0.0082611	covTest	Original	New
cg19569074	Family instability	81m	middle	0.0308402	2.14844e-08	0.000945867	-0.082233	-0.0568295	covTest	Original	New
cg21403761	Family instability	57m	early	0.0225106	3.49328e-06	0.022564	-0.0338597	-0.0473371	covTest	Original	New
cg22986281	Family instability	57m	early	0.0194059	2.08362e-05	0.0453267	-0.0187076	-0.0199383	covTest	Original	New
cg23184756	Family instability	57m	early	0.0257681	7.46742e-07	0.00865153	-0.0279185	-0.024215	covTest	Original	New
cg25477176	Family instability	57m	early	0.0277321	1.24099e-07	0.00355616	-0.0356411	-0.0193196	covTest	Original	New
cg25697998	Family instability	57m	early	0.0189941	1.91792e-05	0.0431464	-0.014527	-0.029934	covTest	Original	New
cg01099220	Family instability	57m	early	0.0242871	1.64362e-05	0.0402008	0.00526009	0.0126856	covTest	Original	New
cg01654242	Family instability	57m	early	0.0238021	1.20521e-05	0.0346798	-0.076851	-0.0453269	covTest	Original	New
cg03287126	Family instability	57m	early	0.0232433	5.17625e-06	0.026194	-0.00943994	-0.00908713	covTest	Original	New
cg06832258	Family instability	81m	middle	0.017787	2.39021e-05	0.0478321	-0.007788	-0.00942561	covTest	Original	New
cg13126652	Family instability	57m	early	0.0228398	7.97981e-06	0.0290344	-0.00733666	-0.010023	covTest	Original	New
cg15413269	Family instability	57m	early	0.0196146	1.00346e-05	0.0320784	-0.0183077	-0.0221494	covTest	Original	New
cg16231917	Family instability	57m	early	0.0261549	1.6955e-06	0.0142161	0.0156123	0.0582377	covTest	Original	New
cg16405960	Family instability	57m	early	0.0218464	3.7637e-06	0.0229915	-0.0165554	-0.0202439	covTest	Original	New
cg20374114	Family instability	69m	middle	0.0216934	1.56677e-05	0.03949	-0.0395529	-0.0564705	covTest	Original	New
cg20586163	Family instability	57m	early	0.0204153	1.27021e-05	0.0349513	-0.0308884	-0.0263873	covTest	Original	New
cg20642630	Family instability	69m	middle	0.0271589	1.72594e-06	0.0142161	-0.0357912	-0.0267737	covTest	Original	New
cg20684661	Family instability	57m	early	0.0245772	9.08501e-07	0.00952319	-0.0248954	-0.0240101	covTest	Original	New
cg26159052	Family instability	57m	early	0.0240714	4.06573e-06	0.0238662	-0.0523044	-0.045852	covTest	Original	New
cg27457457	Family instability	57m	early	0.0275612	7.56251e-08	0.00256111	-0.0400653	-0.0593882	covTest	Original	New
cg06202426	Family instability	81m	middle	0.0211804	2.13492e-05	0.0453267	-0.148543	-0.0558173	covTest	Original	New
cg13695362	Family instability	57m	early	0.0297153	1.99156e-07	0.00419307	-0.0136635	-0.0135386	covTest	Original	New
cg13764897	Family instability	81m	middle	0.0210153	1.74004e-05	0.0408854	-0.0196206	-0.0156052	covTest	Original	New
cg21172807	Family instability	57m	early	0.0270382	2.00007e-07	0.00419307	0.002517	0.0188026	covTest	Original	New
cg05025427	Family instability	57m	early	0.0195078	1.02191e-05	0.032367	-0.00696146	-0.0118734	covTest	Original	New
cg05311383	Family instability	57m	early	0.0222585	4.19234e-06	0.0240664	-0.0248461	-0.0323829	covTest	Original	New
cg05886789	Family instability	57m	early	0.0263594	5.36787e-07	0.00716134	-0.0203041	-0.0232361	covTest	Original	New
cg06237151	Family instability	57m	early	0.0193695	6.40882e-06	0.0283915	-0.00735272	-0.0105798	covTest	Original	New
cg07206497	Family instability	57m	early	0.028991	1.56221e-07	0.00382096	-0.014721	-0.0174593	covTest	Original	New
cg07316943	Family instability	57m	early	0.0283901	1.05711e-06	0.0108233	-0.0466985	-0.054579	covTest	Original	New
cg10522115	Family instability	81m	middle	0.0247989	1.38011e-06	0.0126584	-0.0310403	-0.0273821	covTest	Original	New
cg13351028	Family instability	57m	early	0.0222495	7.45136e-06	0.0287298	-0.015131	-0.0125034	covTest	Original	New
cg13604462	Family instability	57m	early	0.0216163	6.71973e-06	0.0283915	-0.0181132	-0.0121052	covTest	Original	New
cg17954226	Family instability	57m	early	0.0209465	2.22984e-05	0.0460893	-0.0105567	-0.0185735	covTest	Original	New
cg01504589	Family instability	57m	early	0.0188492	2.05352e-05	0.0452039	-0.0254172	-0.0332629	covTest	Original	New
cg02331272	Family instability	57m	early	0.0215051	7.61746e-06	0.0287298	-0.0318809	-0.0377537	covTest	Original	New
cg08066991	Family instability	69m	middle	0.0313717	3.73377e-09	0.000249891	0.066638	0.0474629	covTest	Original	New
cg10314807	Family instability	69m	middle	0.0255271	3.85524e-06	0.0229915	-0.0177148	-0.0126256	covTest	Original	New
cg19484995	Family instability	57m	early	0.0215876	6.71655e-06	0.0283915	-0.0234366	-0.0237528	covTest	Original	New
cg22011436	Family instability	57m	early	0.0266267	8.16993e-07	0.00877285	-0.0245513	-0.022414	covTest	Original	New
cg23915197	Family instability	57m	early	0.0197881	1.25015e-05	0.0349513	-0.00756576	-0.0124734	covTest	Original	New
cg24711070	Family instability	81m	middle	0.0290458	1.43773e-07	0.00372337	-0.0328043	-0.0246105	covTest	Original	New
cg25872852	Family instability	57m	early	0.0218923	1.53295e-05	0.0394672	-0.0373578	-0.0215462	covTest	Original	New
cg26997966	Family instability	57m	early	0.0362545	1.02903e-09	0.000179459	-0.0229954	-0.0215987	covTest	Original	New
cg27533472	Family instability	57m	early	0.0188579	1.50663e-05	0.0393853	-0.00910455	-0.00937813	covTest	Original	New
ch.11.1877857R	Family instability	69m	middle	0.0254066	1.26953e-06	0.0120499	0.00246307	0.00464506	covTest	Original	New
cg00967695	Family instability	57m	early	0.0343112	3.97321e-09	0.000249891	-0.0196519	-0.023572	covTest	Original	New
cg01267076	Family instability	57m	early	0.0272337	6.28567e-07	0.00783389	-0.0163429	-0.015693	covTest	Original	New
cg03354009	Family instability	69m	middle	0.0198162	2.29675e-05	0.0468129	0.00353664	0.00415718	covTest	Original	New
cg06998640	Family instability	57m	early	0.0242655	6.95054e-06	0.0283915	-0.0127201	-0.0133011	covTest	Original	New
cg07173149	Family instability	57m	early	0.0200649	5.09102e-06	0.0260623	-0.00878239	-0.010543	covTest	Original	New
cg09058293	Family instability	81m	middle	0.0209674	2.12382e-05	0.0453267	-0.00482855	-0.0115711	covTest	Original	New
cg10940545	Family instability	81m	middle	0.0261468	4.79901e-07	0.00681548	-0.0514821	-0.053588	covTest	Original	New
cg13706680	Family instability	57m	early	0.0392852	1.27228e-09	0.000179459	-0.0203413	-0.0188449	covTest	Original	New
cg14637285	Family instability	57m	early	0.0222465	1.13282e-05	0.0341597	-0.0137788	-0.0202145	covTest	Original	New
cg14795047	Family instability	57m	early	0.0230199	1.526e-06	0.0134366	0.005002	0.00523624	covTest	Original	New
cg15736336	Family instability	57m	early	0.0225899	6.76232e-06	0.0283915	-0.0151951	-0.0143123	covTest	Original	New
cg16378549	Family instability	57m	early	0.0220403	5.98873e-06	0.0281699	-0.0306585	-0.0254985	covTest	Original	New
cg04079399	Family instability	30m	very early	0.0358629	1.6305e-09	0.000179459	-0.0165094	-0.0171344	covTest	Original	New
cg12987911	Family instability	57m	early	0.0206135	9.20813e-06	0.0307462	-0.022934	-0.0163374	covTest	Original	New
cg15247434	Family instability	57m	early	0.0264989	4.76082e-07	0.00681548	0.00188186	0.00813503	covTest	Original	New
cg01507833	Family instability	57m	early	0.0209569	2.26148e-05	0.0463085	-0.014339	-0.0158195	covTest	Original	New
cg06787316	Family instability	recency	recency	0.0209325	1.44553e-05	0.0385631	NA	NA	covTest	Original	New
cg08802167	Family instability	81m	middle	0.023411	7.72979e-06	0.0287298	0.00468448	0.00754111	covTest	Original	New
cg12188526	Family instability	57m	early	0.0209019	2.77383e-06	0.0193841	-0.0109876	-0.0137834	covTest	Original	New
cg18390865	Family instability	57m	early	0.0238734	1.2864e-06	0.0120499	-0.00896515	-0.0108204	covTest	Original	New
cg18829186	Family instability	57m	early	0.0204424	1.11222e-05	0.0340043	0.00490139	0.0102643	covTest	Original	New
cg18970800	Family instability	18m	very early	0.0179137	1.00551e-05	0.0320784	-0.0418157	-0.0190035	covTest	Original	New
cg23137569	Family instability	57m	early	0.0220387	9.39797e-06	0.0307462	0.00463083	0.00550007	covTest	Original	New
cg23316886	Family instability	57m	early	0.0212239	1.17088e-05	0.0341724	-0.012439	-0.019675	covTest	Original	New
cg23689069	Family instability	57m	early	0.0172312	2.17046e-05	0.0453267	-0.00571508	-0.0122033	covTest	Original	New
cg27295288	Family instability	57m	early	0.0206666	2.51744e-05	0.0496949	-0.0257426	-0.0150527	covTest	Original	New
cg00323522	Family instability	69m	middle	0.0222051	1.21826e-05	0.0348277	-0.0222236	-0.0150845	covTest	Original	New
cg03366285	Family instability	57m	early	0.0205179	2.44907e-05	0.0485819	-0.0121441	-0.0188844	covTest	Original	New
cg09662201	Family instability	57m	early	0.0202861	1.7459e-05	0.0408854	-0.0241049	-0.0231914	covTest	Original	New
cg20555018	Family instability	57m	early	0.0236246	1.16028e-05	0.0341724	-0.0173333	-0.0185053	covTest	Original	New
cg20557801	Family instability	57m	early	0.0214459	4.67014e-06	0.0247718	0.0064244	0.0183317	covTest	Original	New
cg26241852	Family instability	69m	middle	0.0185384	1.9981e-05	0.0442049	0.00327766	0.0100375	covTest	Original	New
cg01841772	Family instability	57m	early	0.0240108	1.8182e-06	0.0145541	-0.0327663	-0.0407911	covTest	Original	New
cg04958528	Family instability	57m	early	0.0198505	2.44974e-05	0.0485819	-0.0243125	-0.0187764	covTest	Original	New
cg06381966	Family instability	recency	recency	0.0204659	1.26389e-05	0.0349513	NA	NA	covTest	Original	New
cg06389950	Family instability	57m	early	0.0200735	6.65731e-06	0.0283915	-0.0178099	-0.0346918	covTest	Original	New
cg09119881	Family instability	accumulation	accumulation	0.0234113	9.4786e-06	0.0307462	NA	NA	covTest	Original	New
cg09305491	Family instability	57m	early	0.0207832	2.56887e-06	0.0191688	-0.00787123	-0.0134045	covTest	Original	New
cg27567416	Family instability	57m	early	0.0225055	3.8645e-06	0.0229915	-0.0140665	-0.0146302	covTest	Original	New
cg05353659	Family instability	57m	early	0.0283967	9.94713e-08	0.00312807	-0.00909751	-0.0139487	covTest	Original	New
cg12808990	Family instability	57m	early	0.02324	5.41918e-06	0.0268071	-0.0249537	-0.0248577	covTest	Original	New
cg13189147	Family instability	57m	early	0.0215802	3.41713e-06	0.022454	-0.0106307	-0.018931	covTest	Original	New
cg20155837	Family instability	57m	early	0.0234988	6.38613e-06	0.0283915	-0.00879633	-0.0100417	covTest	Original	New
cg27575622	Family instability	30m	very early	0.0212356	1.23264e-05	0.0349513	-0.00909152	-0.0161356	covTest	Original	New
cg12787950	Family instability	57m	early	0.0200491	1.26605e-05	0.0349513	-0.0104625	-0.0127107	covTest	Original	New
cg21078966	Family instability	57m	early	0.0196464	1.19885e-05	0.0346798	-0.0181198	-0.0164222	covTest	Original	New
cg03252986	Family instability	57m	early	0.0222233	4.37315e-06	0.0240664	0.00237558	0.00442368	covTest	Original	New
cg11438065	Family instability	57m	early	0.0248775	1.56572e-06	0.0135161	-0.00879462	-0.0124071	covTest	Original	New
cg14401897	Family instability	57m	early	0.0261715	3.06742e-07	0.00540182	-0.0140207	-0.0356425	covTest	Original	New
cg15751406	Family instability	81m	middle	0.0195803	8.99965e-06	0.0307462	-0.00528353	-0.0101651	covTest	Original	New
cg22464169	Family instability	57m	early	0.0211163	1.16145e-05	0.0341724	0.00384123	0.0166676	covTest	Original	New
cg25726085	Family instability	81m	middle	0.0242951	8.09761e-06	0.0292216	-0.0436854	-0.0533027	covTest	Original	New
cg27312603	Family instability	recency	recency	0.0216294	8.25803e-06	0.0295288	NA	NA	covTest	Original	New
cg01059881	Family instability	recency	recency	0.0209536	2.08995e-05	0.0453267	NA	NA	covTest	Original	New
cg13031595	Family instability	57m	early	0.0218177	1.09671e-05	0.0337646	-0.0162867	-0.0169184	covTest	Original	New
cg14588259	Family instability	57m	early	0.0194428	1.37325e-05	0.0373199	-0.02268	-0.0174342	covTest	Original	New
cg26848593	Family instability	69m	middle	0.030939	3.65915e-09	0.000249891	0.00168421	0.00412725	covTest	Original	New
cg27346545	Family instability	recency	recency	0.0223338	6.55463e-06	0.0283915	NA	NA	covTest	Original	New
cg06264060	Family instability	81m	middle	0.0270359	7.24383e-07	0.00861932	-0.0144585	-0.0259816	covTest	Original	New
cg13504714	Family instability	57m	early	0.0194055	1.67352e-05	0.0406477	0.00209411	0.00663359	covTest	Original	New
cg00066499	Prenatal smoking	first	first	0.0105338	0.000236185	0.0346673	0.000175004	0.000233207	CovTest	Original	New
cg00116430	Prenatal smoking	first	first	0.0101752	0.000343246	0.04123	-0.0036955	-0.00543455	CovTest	Original	New
cg00504690	Prenatal smoking	second	second	0.010217	0.000345728	0.0413162	-0.000154066	-0.000157206	CovTest	Original	New
cg00777310	Prenatal smoking	accumulation	accumulation	0.0169059	8.42316e-05	0.0220439	NA	NA	CovTest	Original	New
cg00922420	Prenatal smoking	first	first	0.013839	7.33217e-05	0.0206528	-6.15697e-05	-9.61902e-05	CovTest	Original	New
cg00955828	Prenatal smoking	first	first	0.0126185	0.000209205	0.032789	0.000959704	-2.68678e-05	CovTest	Original	New
cg00962755	Prenatal smoking	first	first	0.013596	0.000368792	0.0426083	-0.00054707	-0.00383827	CovTest	Original	New
cg01550473	Prenatal smoking	first	first	0.0144417	4.06009e-05	0.0160025	0.0024696	0.000110441	CovTest	Original	New
cg01951489	Prenatal smoking	first	first	0.0110465	0.000219032	0.03339	0.000612845	0.000937931	CovTest	Original	New
cg02570527	Prenatal smoking	first	first	0.0130359	5.69928e-05	0.0187529	-0.000223919	-0.000569618	CovTest	Original	New
cg02955077	Prenatal smoking	second	second	0.0130466	8.13476e-05	0.0216339	-0.000236429	-6.75362e-05	CovTest	Original	New
cg03321592	Prenatal smoking	first	first	0.0133963	1.80738e-05	0.01116	-0.00259622	-0.00108551	CovTest	Original	New
cg03324123	Prenatal smoking	first	first	0.0130475	4.95156e-05	0.0175507	-0.000609537	-0.00115105	CovTest	Original	New
cg03585778	Prenatal smoking	first	first	0.0138973	6.86716e-05	0.0201211	-0.00246002	-0.000909956	CovTest	Original	New
cg03945034	Prenatal smoking	first	first	0.0112427	0.000127881	0.0261778	-0.00255892	0.00114881	CovTest	Original	New
cg03981727	Prenatal smoking	first	first	0.0105356	0.00030894	0.0391876	0.00011329	7.95725e-05	CovTest	Original	New
cg04296903	Prenatal smoking	accumulation	accumulation	0.0199138	6.11213e-06	0.00668619	NA	NA	CovTest	Original	New
cg04413644	Prenatal smoking	first	first	0.0107414	0.000170512	0.0299676	-0.00304837	-0.00274916	CovTest	Original	New
cg04562522	Prenatal smoking	first	first	0.0145624	0.000123581	0.0258714	-0.000216503	0.000101853	CovTest	Original	New
cg04902265	Prenatal smoking	first	first	0.0129761	5.54545e-05	0.0185941	0.0025317	0.00344491	CovTest	Original	New
cg05139434	Prenatal smoking	first	first	0.00955135	0.000426493	0.0454509	0.000826577	0.000196353	CovTest	Original	New
cg05792003	Prenatal smoking	first	first	0.0167645	3.23395e-05	0.0144839	0.00038704	0.000552739	CovTest	Original	New
cg05796704	Prenatal smoking	accumulation	accumulation	0.0108685	0.000395071	0.0439742	NA	NA	CovTest	Original	New
cg05921170	Prenatal smoking	first	first	0.0125102	5.36073e-05	0.0182841	-0.00197878	-0.00123905	CovTest	Original	New
cg05943574	Prenatal smoking	first	first	0.0105325	0.000446229	0.0463115	0.0018403	0.00310068	CovTest	Original	New
cg06443644	Prenatal smoking	first	first	0.0120555	9.66555e-05	0.0231581	-0.00629601	-0.00377809	CovTest	Original	New
cg06617202	Prenatal smoking	first	first	0.0117228	0.000129363	0.0262941	0.00486787	0.00861706	CovTest	Original	New
cg07212644	Prenatal smoking	first	first	0.0110937	0.000496873	0.0488109	-0.000745908	-0.000142231	CovTest	Original	New
cg07835289	Prenatal smoking	first	first	0.0109737	0.000118049	0.0253916	-0.000456243	7.48922e-05	CovTest	Original	New
cg09767587	Prenatal smoking	first	first	0.0123275	0.00014985	0.0281381	-0.00149568	-0.00244758	CovTest	Original	New
cg09895920	Prenatal smoking	first	first	0.0121077	0.000123457	0.0258576	-0.00361888	-0.0069302	CovTest	Original	New
cg10314909	Prenatal smoking	first	first	0.0122356	0.000437644	0.0459408	-0.000144391	0.000970888	CovTest	Original	New
cg11227621	Prenatal smoking	first	first	0.014148	0.000235219	0.0346568	-0.000238993	-5.14507e-06	CovTest	Original	New
cg11235921	Prenatal smoking	first	first	0.0131892	6.78182e-05	0.0199943	-0.000631124	0.00621554	CovTest	Original	New
cg11390151	Prenatal smoking	first	first	0.0128307	6.99446e-05	0.020219	-0.00528805	-0.000861846	CovTest	Original	New
cg11425754	Prenatal smoking	second	second	0.0136314	1.39236e-05	0.00971467	0.00088565	-0.000724532	CovTest	Original	New
cg11531628	Prenatal smoking	first	first	0.0136105	0.000149688	0.0281381	3.09133e-05	-0.000112418	CovTest	Original	New
cg11697440	Prenatal smoking	first	first	0.0126172	0.000147372	0.0279404	-0.000850797	0.00174235	CovTest	Original	New
cg11955474	Prenatal smoking	first	first	0.0144975	3.49659e-05	0.0150039	-0.000585104	-0.000653455	CovTest	Original	New
cg11967457	Prenatal smoking	first	first	0.0101435	0.000285921	0.0379041	-5.54265e-05	9.98182e-05	CovTest	Original	New
cg12278631	Prenatal smoking	first	first	0.012259	0.000142333	0.0275442	-0.00119583	-0.00182381	CovTest	Original	New
cg12396969	Prenatal smoking	first	first	0.0113377	0.000305111	0.0390368	-0.00197144	-0.0024202	CovTest	Original	New
cg13244315	Prenatal smoking	first	first	0.0171582	1.5161e-06	0.00352587	0.00126348	0.00124181	CovTest	Original	New
cg13446200	Prenatal smoking	first	first	0.0117593	0.000475223	0.0477679	0.000598551	9.64316e-05	CovTest	Original	New
cg13449535	Prenatal smoking	first	first	0.0172813	2.45687e-06	0.00437503	0.00222433	0.00133512	CovTest	Original	New
cg14166948	Prenatal smoking	accumulation	accumulation	0.0132317	0.000397159	0.04411	NA	NA	CovTest	Original	New
cg14524775	Prenatal smoking	first	first	0.0107873	0.000181092	0.0308771	0.000813387	0.000210874	CovTest	Original	New
cg15135704	Prenatal smoking	first	first	0.0107484	0.000197683	0.0320204	0.000838785	0.000658473	CovTest	Original	New
cg15457058	Prenatal smoking	first	first	0.0126608	0.000134206	0.0267717	-7.59119e-05	9.1928e-06	CovTest	Original	New
cg15823064	Prenatal smoking	first	first	0.0128092	0.000185049	0.0310958	0.00154437	0.00087971	CovTest	Original	New
cg16002864	Prenatal smoking	first	first	0.0133456	4.68466e-05	0.0170647	0.000314046	8.39551e-05	CovTest	Original	New
cg17243193	Prenatal smoking	first	first	0.0104772	0.000225618	0.0338548	0.000695303	0.000107261	CovTest	Original	New
cg17244801	Prenatal smoking	first	first	0.0154067	4.10256e-05	0.0160979	-0.00172992	-0.00421663	CovTest	Original	New
cg17284804	Prenatal smoking	first	first	0.0125595	0.000353469	0.0417891	-0.000194278	-0.000515816	CovTest	Original	New
cg17479716	Prenatal smoking	first	first	0.0127859	0.00023835	0.034839	-0.00422257	-0.00171092	CovTest	Original	New
cg18861810	Prenatal smoking	first	first	0.0118176	0.000209355	0.0327898	0.00112322	0.00116556	CovTest	Original	New
cg19234591	Prenatal smoking	first	first	0.0129459	0.000116509	0.0252679	0.000128655	-3.78678e-05	CovTest	Original	New
cg19249107	Prenatal smoking	accumulation	accumulation	0.0197429	6.61887e-07	0.0024704	NA	NA	CovTest	Original	New
cg19251740	Prenatal smoking	recency	recency	0.0160025	2.28299e-05	0.0121243	NA	NA	CovTest	Original	New
cg19316303	Prenatal smoking	second	second	0.011287	0.000257353	0.0360031	-0.000202436	-4.8454e-05	CovTest	Original	New
cg19695415	Prenatal smoking	first	first	0.0110596	0.000148699	0.0280728	0.000245349	-7.12153e-05	CovTest	Original	New
cg19939503	Prenatal smoking	first	first	0.012239	0.000185053	0.0310958	-0.000682177	0.0013258	CovTest	Original	New
cg20136584	Prenatal smoking	first	first	0.0113846	0.000468181	0.0474493	-0.0024694	-0.00144866	CovTest	Original	New
cg20743218	Prenatal smoking	first	first	0.0123358	9.89854e-05	0.0234422	0.0106578	0.0109027	CovTest	Original	New
cg20823455	Prenatal smoking	first	first	0.0110391	0.000120744	0.0255937	0.00298128	0.00408752	CovTest	Original	New
cg21003981	Prenatal smoking	first	first	0.0133368	0.000112547	0.024857	5.87913e-07	-2.08842e-05	CovTest	Original	New
cg21421701	Prenatal smoking	second	second	0.0137487	6.93459e-05	0.0201981	7.04857e-05	9.88545e-06	CovTest	Original	New
cg21943599	Prenatal smoking	first	first	0.0121865	0.000155469	0.0286386	0.00494761	0.00161842	CovTest	Original	New
cg22238104	Prenatal smoking	accumulation	accumulation	0.020991	3.85362e-08	0.000637315	NA	NA	CovTest	Original	New
cg22529511	Prenatal smoking	first	first	0.014116	1.03788e-05	0.008491	-0.00172619	-0.00447493	CovTest	Original	New
cg22724741	Prenatal smoking	second	second	0.011337	0.000453043	0.0465689	0.000716447	0.000373748	CovTest	Original	New
cg22949832	Prenatal smoking	first	first	0.0145664	2.20666e-05	0.012	0.00207664	0.00370874	CovTest	Original	New
cg23734759	Prenatal smoking	first	first	0.0141853	0.000305196	0.0390368	0.000418161	0.00110229	CovTest	Original	New
cg24488772	Prenatal smoking	first	first	0.0107504	0.000444634	0.046256	-0.004744	-0.0022299	CovTest	Original	New
cg24539455	Prenatal smoking	first	first	0.0134755	0.000204308	0.0324691	-0.00531046	-0.00533241	CovTest	Original	New
cg24878868	Prenatal smoking	first	first	0.00953811	0.000475228	0.0477679	0.00190949	0.000724835	CovTest	Original	New
cg25011368	Prenatal smoking	first	first	0.0128348	3.21107e-05	0.0143961	-0.00129094	0.000180742	CovTest	Original	New
cg25381331	Prenatal smoking	first	first	0.0114832	0.000111588	0.0247744	0.0010103	0.00397289	CovTest	Original	New
cg25624478	Prenatal smoking	first	first	0.011365	9.46142e-05	0.02297	0.00571069	0.00874779	CovTest	Original	New
cg25746134	Prenatal smoking	first	first	0.0131147	8.61124e-05	0.0221082	-0.000397166	-0.000665593	CovTest	Original	New
cg25758394	Prenatal smoking	first	first	0.0122873	8.45552e-05	0.0220531	0.00154694	0.00229639	CovTest	Original	New
cg26369133	Prenatal smoking	first	first	0.0141616	0.00046193	0.0471283	0.000253318	-0.000133954	CovTest	Original	New
cg26816907	Prenatal smoking	accumulation	accumulation	0.0111726	0.000207329	0.032708	NA	NA	CovTest	Original	New
cg26938364	Prenatal smoking	first	first	0.0144643	1.3833e-05	0.00971467	-0.000905394	-0.000520989	CovTest	Original	New
cg00064531	Prenatal smoking	first	first	0.0111972	0.000122095	0.0256823	0.00112926	0.00214161	CovTest	Original	New
cg00606472	Prenatal smoking	first	first	0.0144709	1.76858e-05	0.0110758	-0.000105746	-2.20147e-05	CovTest	Original	New
cg01708273	Prenatal smoking	first	first	0.0140565	8.79295e-05	0.0223379	0.00415756	0.00140058	CovTest	Original	New
cg02081402	Prenatal smoking	first	first	0.012483	4.71291e-05	0.0171196	0.0138263	0.0150646	CovTest	Original	New
cg03202659	Prenatal smoking	first	first	0.0100383	0.000332435	0.0407452	0.00132527	0.00821249	CovTest	Original	New
cg04400587	Prenatal smoking	first	first	0.0120395	0.000228262	0.0340426	-0.000224297	2.62628e-05	CovTest	Original	New
cg04770020	Prenatal smoking	first	first	0.014676	8.86231e-06	0.00786631	0.00191899	0.00146666	CovTest	Original	New
cg05261599	Prenatal smoking	first	first	0.0110958	0.000119094	0.0254401	0.000668112	0.000575948	CovTest	Original	New
cg05603527	Prenatal smoking	first	first	0.0100539	0.000382831	0.0432608	0.00163473	0.000354899	CovTest	Original	New
cg05844583	Prenatal smoking	first	first	0.0139713	8.94742e-05	0.0224813	-0.000237031	-0.000438389	CovTest	Original	New
cg06836084	Prenatal smoking	first	first	0.0113661	0.00016285	0.0294133	0.00423153	0.00134421	CovTest	Original	New
cg07590609	Prenatal smoking	first	first	0.0110726	0.000288316	0.038057	0.00119015	0.000597123	CovTest	Original	New
cg08174577	Prenatal smoking	first	first	0.011394	0.000270254	0.0369392	0.00211374	0.00342246	CovTest	Original	New
cg08343042	Prenatal smoking	first	first	0.0113729	0.000253632	0.0357556	-0.000383509	-7.67445e-05	CovTest	Original	New
cg09533708	Prenatal smoking	first	first	0.0107648	0.000306282	0.0390754	0.00121564	0.000597802	CovTest	Original	New
cg09612463	Prenatal smoking	first	first	0.0117959	0.000304018	0.0389654	-0.0024419	0.00190554	CovTest	Original	New
cg09669931	Prenatal smoking	first	first	0.0151889	4.17261e-05	0.0162425	0.000890731	0.0012579	CovTest	Original	New
cg11274314	Prenatal smoking	first	first	0.0115615	0.000379746	0.0430799	-0.00454217	-0.00413526	CovTest	Original	New
cg11608897	Prenatal smoking	first	first	0.0148984	7.19587e-06	0.00718375	0.000183562	0.000114632	CovTest	Original	New
cg11901695	Prenatal smoking	first	first	0.0110072	0.000168861	0.0297369	0.000766164	0.00208879	CovTest	Original	New
cg12206199	Prenatal smoking	first	first	0.015911	2.47384e-05	0.0126643	-7.22489e-05	-1.33725e-05	CovTest	Original	New
cg12311057	Prenatal smoking	first	first	0.0122161	0.000231314	0.0343508	-0.000789089	-0.000183166	CovTest	Original	New
cg12685731	Prenatal smoking	first	first	0.0124872	7.91545e-05	0.0213662	-0.000723579	-0.0005766	CovTest	Original	New
cg12697337	Prenatal smoking	first	first	0.0113419	0.000431946	0.0456244	-0.0183301	-0.0228204	CovTest	Original	New
cg12745632	Prenatal smoking	first	first	0.0136844	5.88507e-05	0.0189592	0.00578014	0.00676156	CovTest	Original	New
cg12991125	Prenatal smoking	first	first	0.0126746	0.000168172	0.0297296	0.000462532	0.000246689	CovTest	Original	New
cg13528561	Prenatal smoking	second	second	0.0130016	0.000417737	0.0450985	-0.000456439	0.000252574	CovTest	Original	New
cg13686615	Prenatal smoking	first	first	0.0139656	3.29864e-05	0.0146101	0.00260311	0.00142662	CovTest	Original	New
cg13703721	Prenatal smoking	first	first	0.0118793	0.000145317	0.02779	0.000241232	0.000404016	CovTest	Original	New
cg14510371	Prenatal smoking	first	first	0.0116744	0.000390834	0.0437987	-0.00010662	-0.00137652	CovTest	Original	New
cg15066179	Prenatal smoking	first	first	0.0120446	7.54622e-05	0.0208603	0.00303978	0.00406893	CovTest	Original	New
cg15140250	Prenatal smoking	first	first	0.0126175	6.08305e-05	0.0192765	0.000592116	0.00161622	CovTest	Original	New
cg15365028	Prenatal smoking	first	first	0.0132063	0.000129689	0.0263145	0.000777873	0.00149263	CovTest	Original	New
cg16364833	Prenatal smoking	first	first	0.00994814	0.000432032	0.0456244	8.18383e-05	-8.55315e-05	CovTest	Original	New
cg17032565	Prenatal smoking	first	first	0.0120157	8.4028e-05	0.0220353	0.000255436	-0.000378672	CovTest	Original	New
cg17727331	Prenatal smoking	first	first	0.0114482	0.000208925	0.0327769	0.00049875	0.000494397	CovTest	Original	New
cg17851061	Prenatal smoking	first	first	0.0107028	0.00016292	0.0294133	-2.39448e-05	0.000156298	CovTest	Original	New
cg17925360	Prenatal smoking	second	second	0.0184115	1.45907e-06	0.0034937	-0.00025191	-0.000153388	CovTest	Original	New
cg18794122	Prenatal smoking	first	first	0.0131578	4.91074e-05	0.0175344	-0.000285209	7.79409e-06	CovTest	Original	New
cg19300414	Prenatal smoking	first	first	0.0159652	2.05873e-06	0.00389721	-0.000998066	-0.000642785	CovTest	Original	New
cg20097440	Prenatal smoking	first	first	0.0109412	0.000121765	0.0256375	-0.000617702	-0.00141347	CovTest	Original	New
cg20499506	Prenatal smoking	first	first	0.0113126	0.000499488	0.04897	-7.73591e-05	-0.000775604	CovTest	Original	New
cg20986935	Prenatal smoking	first	first	0.0112381	0.000482426	0.0481722	-0.0025853	0.00179097	CovTest	Original	New
cg21338532	Prenatal smoking	second	second	0.0113634	0.000427618	0.0454509	-0.000278963	-7.15871e-05	CovTest	Original	New
cg21708692	Prenatal smoking	first	first	0.0134836	4.7742e-05	0.0172426	0.000325313	-5.87584e-05	CovTest	Original	New
cg22029015	Prenatal smoking	first	first	0.0141084	4.08507e-05	0.0160579	0.000463481	0.00107188	CovTest	Original	New
cg22296756	Prenatal smoking	first	first	0.0104226	0.000261067	0.0362534	-0.00323019	-0.00166781	CovTest	Original	New
cg22479842	Prenatal smoking	first	first	0.0113501	0.000452038	0.0464983	-0.000745044	-9.2013e-05	CovTest	Original	New
cg22909769	Prenatal smoking	first	first	0.0146761	2.83154e-05	0.0134332	0.000177372	1.19678e-05	CovTest	Original	New
cg23108709	Prenatal smoking	first	first	0.0137606	4.95031e-05	0.0175507	-4.93696e-05	-0.000185742	CovTest	Original	New
cg23361708	Prenatal smoking	second	second	0.0126068	4.42921e-05	0.0166831	0.000280568	3.19856e-05	CovTest	Original	New
cg23725210	Prenatal smoking	first	first	0.00974699	0.000485385	0.0483075	0.00371875	0.00281508	CovTest	Original	New
cg24428372	Prenatal smoking	first	first	0.0123516	0.000146418	0.0278934	0.000848097	0.00176565	CovTest	Original	New
cg25033515	Prenatal smoking	first	first	0.0101449	0.000399817	0.0442797	0.000941094	0.000868407	CovTest	Original	New
cg26625629	Prenatal smoking	first	first	0.0104827	0.000210005	0.0328208	2.98736e-06	4.32102e-05	CovTest	Original	New
cg27587568	Prenatal smoking	first	first	0.00997871	0.000333972	0.0408086	0.00339839	0.00334002	CovTest	Original	New
cg27636536	Prenatal smoking	first	first	0.0196661	1.90616e-07	0.00151411	0.000304655	1.2229e-05	CovTest	Original	New
cg00060320	Prenatal smoking	first	first	0.0100142	0.000423251	0.045338	-0.000865621	-0.0002984	CovTest	Original	New
cg01896761	Prenatal smoking	first	first	0.0112008	0.000476909	0.0478166	-0.00360217	-0.0032131	CovTest	Original	New
cg02523270	Prenatal smoking	first	first	0.0136296	0.000152611	0.0283613	-0.00288269	-0.00575871	CovTest	Original	New
cg02721184	Prenatal smoking	first	first	0.0126233	0.000168858	0.0297369	0.000250825	0.000243128	CovTest	Original	New
cg03776034	Prenatal smoking	first	first	0.0106564	0.000292092	0.0382497	-6.59661e-05	4.4099e-05	CovTest	Original	New
cg07908870	Prenatal smoking	first	first	0.0121043	0.000195381	0.0318858	-0.00443628	-0.00284223	CovTest	Original	New
cg08805144	Prenatal smoking	first	first	0.0116882	9.08934e-05	0.022535	-0.000110011	-0.000119052	CovTest	Original	New
cg09462808	Prenatal smoking	first	first	0.00994745	0.000500214	0.0490037	-0.00158798	-0.00173388	CovTest	Original	New
cg09650880	Prenatal smoking	first	first	0.0157232	5.30317e-05	0.0182118	-0.00404995	-0.00329841	CovTest	Original	New
cg10525567	Prenatal smoking	first	first	0.0113011	0.000299342	0.0387041	-0.00024655	0.000932194	CovTest	Original	New
cg14227821	Prenatal smoking	first	first	0.0132376	6.70911e-05	0.0199646	-0.000305466	-1.32259e-05	CovTest	Original	New
cg15166552	Prenatal smoking	first	first	0.0103648	0.000422889	0.045338	-0.00168539	-0.00154995	CovTest	Original	New
cg15174977	Prenatal smoking	first	first	0.0179574	2.80063e-06	0.0046882	0.00118397	0.000823423	CovTest	Original	New
cg15665928	Prenatal smoking	first	first	0.0127154	0.000222035	0.0335919	-0.00363812	-0.00362529	CovTest	Original	New
cg15688619	Prenatal smoking	first	first	0.0118855	0.000493127	0.0485929	-0.000825616	-0.00302471	CovTest	Original	New
cg17451771	Prenatal smoking	first	first	0.0135012	2.24094e-05	0.0120316	-0.00112854	-0.00200685	CovTest	Original	New
cg17469292	Prenatal smoking	first	first	0.0168897	1.00144e-06	0.00288938	0.000118277	0.000905471	CovTest	Original	New
cg17541025	Prenatal smoking	first	first	0.0114917	0.000242495	0.0350913	0.0135763	0.0160132	CovTest	Original	New
cg18028347	Prenatal smoking	first	first	0.015757	1.9858e-05	0.0114856	-0.000399285	-0.00038267	CovTest	Original	New
cg18337363	Prenatal smoking	first	first	0.0128076	3.05387e-05	0.0140637	0.00186065	0.00214054	CovTest	Original	New
cg18599322	Prenatal smoking	first	first	0.0133872	8.00397e-05	0.0214474	-0.00130441	-0.00390522	CovTest	Original	New
cg19549465	Prenatal smoking	first	first	0.011118	0.000437051	0.0459005	0.000752279	0.000669898	CovTest	Original	New
cg20198526	Prenatal smoking	first	first	0.0126707	3.7422e-05	0.0154698	0.000742241	0.000302796	CovTest	Original	New
cg20950724	Prenatal smoking	first	first	0.0120954	0.000378483	0.0429817	0.000665525	0.000116159	CovTest	Original	New
cg23542590	Prenatal smoking	first	first	0.0121881	0.000299821	0.0387319	0.00630985	0.00670831	CovTest	Original	New
cg23827531	Prenatal smoking	first	first	0.0157931	3.73376e-05	0.0154621	0.00267157	-0.0012355	CovTest	Original	New
cg25104512	Prenatal smoking	first	first	0.0163349	1.38798e-05	0.00971467	-0.000372098	-0.00010106	CovTest	Original	New
cg26785250	Prenatal smoking	first	first	0.013313	1.89494e-05	0.0114282	-7.30541e-05	-8.75361e-05	CovTest	Original	New
cg00004082	Prenatal smoking	first	first	0.0184207	3.63755e-06	0.00532046	0.00053767	-0.000650813	CovTest	Original	New
cg00484466	Prenatal smoking	first	first	0.0154223	5.23619e-06	0.00632507	0.00162517	0.00400256	CovTest	Original	New
cg00516513	Prenatal smoking	first	first	0.0107169	0.000477754	0.047869	2.65294e-05	4.08105e-06	CovTest	Original	New
cg00866373	Prenatal smoking	second	second	0.0105664	0.000300647	0.0387931	0.00032499	0.000157203	CovTest	Original	New
cg01377200	Prenatal smoking	second	second	0.0103469	0.000455041	0.0466817	0.000687621	-0.000378894	CovTest	Original	New
cg02296904	Prenatal smoking	first	first	0.010626	0.000230833	0.034321	0.00144645	0.000844498	CovTest	Original	New
cg03543639	Prenatal smoking	first	first	0.0106482	0.000177791	0.0305696	0.00288254	0.00469185	CovTest	Original	New
cg04214467	Prenatal smoking	first	first	0.00959505	0.000497549	0.0488514	-0.000942646	-0.00109626	CovTest	Original	New
cg05429508	Prenatal smoking	first	first	0.0110725	0.000294428	0.0384412	-0.00205373	-3.42577e-05	CovTest	Original	New
cg07674095	Prenatal smoking	first	first	0.0123716	0.000271262	0.0370422	-0.0102877	-0.0113978	CovTest	Original	New
cg09555617	Prenatal smoking	first	first	0.0128595	0.000393242	0.0439187	0.00111409	0.000384812	CovTest	Original	New
cg09841884	Prenatal smoking	first	first	0.0122971	0.000152302	0.028345	0.00042546	3.9794e-05	CovTest	Original	New
cg10271547	Prenatal smoking	first	first	0.0110849	0.000119282	0.0254547	0.00039504	0.00371425	CovTest	Original	New
cg10930664	Prenatal smoking	first	first	0.0114597	0.000189128	0.0314802	0.000436218	0.000414314	CovTest	Original	New
cg11511795	Prenatal smoking	first	first	0.0110051	0.000460138	0.0470021	0.0069645	0.00389259	CovTest	Original	New
cg12817154	Prenatal smoking	first	first	0.0140587	1.82379e-05	0.0112201	0.00212079	0.0017004	CovTest	Original	New
cg12858909	Prenatal smoking	first	first	0.0117162	7.11938e-05	0.0203517	-0.000352646	-0.000546931	CovTest	Original	New
cg13281139	Prenatal smoking	first	first	0.0111838	0.000338152	0.0410347	0.000605531	-1.36822e-05	CovTest	Original	New
cg13286525	Prenatal smoking	first	first	0.0105512	0.000291917	0.0382408	0.0012438	0.000850794	CovTest	Original	New
cg13677120	Prenatal smoking	first	first	0.0120227	5.35905e-05	0.0182841	0.000755911	0.000272065	CovTest	Original	New
cg13929734	Prenatal smoking	first	first	0.011919	0.000242706	0.0350913	0.00115498	0.000247687	CovTest	Original	New
cg14435644	Prenatal smoking	first	first	0.0103959	0.00033699	0.0410067	-0.000638952	-0.000118573	CovTest	Original	New
cg14595558	Prenatal smoking	first	first	0.0124977	5.46728e-05	0.0184569	-0.000696455	0.00155457	CovTest	Original	New
cg16199219	Prenatal smoking	first	first	0.01077	0.000254555	0.0358202	-0.000137824	-0.00108929	CovTest	Original	New
cg16786640	Prenatal smoking	first	first	0.0152203	1.04414e-05	0.00849706	-0.00624205	-0.00610135	CovTest	Original	New
cg16900209	Prenatal smoking	first	first	0.0107019	0.000320004	0.0398427	0.000522998	7.57472e-05	CovTest	Original	New
cg17332603	Prenatal smoking	first	first	0.0153517	6.89202e-05	0.0201383	-0.00338367	-0.00919305	CovTest	Original	New
cg17386812	Prenatal smoking	first	first	0.0143522	0.000200595	0.0322043	0.00500331	0.0051958	CovTest	Original	New
cg17434366	Prenatal smoking	first	first	0.0140195	7.49351e-05	0.0207815	0.00109648	0.00104277	CovTest	Original	New
cg17898329	Prenatal smoking	first	first	0.0132938	0.00023209	0.0344038	-0.00467563	-0.00315751	CovTest	Original	New
cg18065160	Prenatal smoking	first	first	0.0145581	7.77651e-06	0.00748773	-0.000955043	-0.000451904	CovTest	Original	New
cg20058148	Prenatal smoking	first	first	0.0109261	0.000182166	0.0309441	0.0131937	0.0140589	CovTest	Original	New
cg20356136	Prenatal smoking	first	first	0.0105176	0.000189597	0.0314899	0.000915553	9.58867e-05	CovTest	Original	New
cg21788443	Prenatal smoking	first	first	0.0141964	2.34523e-05	0.0123064	0.000773674	0.000684409	CovTest	Original	New
cg22466995	Prenatal smoking	accumulation	accumulation	0.0108311	0.000331407	0.0406646	NA	NA	CovTest	Original	New
cg23081204	Prenatal smoking	first	first	0.0100097	0.000489313	0.0484533	0.00260843	0.00326892	CovTest	Original	New
cg23893620	Prenatal smoking	first	first	0.0111928	0.000468995	0.0474978	0.0125722	0.00974537	CovTest	Original	New
cg25840318	Prenatal smoking	first	first	0.010892	0.000232954	0.0344623	-0.000846962	0.000746861	CovTest	Original	New
cg00319661	Prenatal smoking	first	first	0.0102534	0.000358243	0.0421258	0.00239165	0.00227676	CovTest	Original	New
cg00795341	Prenatal smoking	first	first	0.0131094	3.90386e-05	0.015745	-2.96601e-05	-0.000746806	CovTest	Original	New
cg01051581	Prenatal smoking	first	first	0.0104819	0.000241326	0.0350872	0.00122376	0.00270012	CovTest	Original	New
cg01946760	Prenatal smoking	first	first	0.0125364	8.29145e-05	0.0218694	0.000322893	0.000223092	CovTest	Original	New
cg02005490	Prenatal smoking	second	second	0.0154937	6.88488e-05	0.0201383	0.00194853	0.00395911	CovTest	Original	New
cg02286091	Prenatal smoking	first	first	0.0109442	0.000271935	0.0370877	-0.00168501	-0.00166265	CovTest	Original	New
cg04009887	Prenatal smoking	first	first	0.0112849	0.000174683	0.0303016	-7.19379e-05	-0.000125512	CovTest	Original	New
cg04160694	Prenatal smoking	first	first	0.0155233	2.45269e-05	0.0125999	0.00393555	0.00353738	CovTest	Original	New
cg06777516	Prenatal smoking	first	first	0.0130865	2.13136e-05	0.0119045	-0.00180873	-0.00558766	CovTest	Original	New
cg06795635	Prenatal smoking	first	first	0.0121885	0.00015166	0.0283127	0.000334637	0.00033346	CovTest	Original	New
cg07285213	Prenatal smoking	first	first	0.0106298	0.000191398	0.0316308	0.00407367	0.00361332	CovTest	Original	New
cg08466792	Prenatal smoking	first	first	0.0117086	0.000374309	0.0428825	-0.000205845	-0.000133503	CovTest	Original	New
cg08523384	Prenatal smoking	first	first	0.0111148	0.000237801	0.0347703	0.00947512	0.00528164	CovTest	Original	New
cg08742194	Prenatal smoking	first	first	0.00969272	0.000415834	0.0450888	-0.00400083	-0.00391704	CovTest	Original	New
cg10632093	Prenatal smoking	first	first	0.0159715	2.62158e-06	0.00454397	-0.00363263	-0.00346135	CovTest	Original	New
cg10784386	Prenatal smoking	first	first	0.0153495	2.59492e-05	0.0128833	-0.00129376	-0.00114019	CovTest	Original	New
cg12488854	Prenatal smoking	first	first	0.0153582	4.38855e-05	0.0166386	0.000595209	-0.000285953	CovTest	Original	New
cg12662072	Prenatal smoking	first	first	0.0123237	0.00012033	0.0255429	0.000304517	8.09149e-05	CovTest	Original	New
cg13039585	Prenatal smoking	first	first	0.0120482	0.000146401	0.0278934	-0.000429924	0.000581189	CovTest	Original	New
cg13367929	Prenatal smoking	first	first	0.0124901	7.84047e-05	0.0212289	7.32858e-05	0.000568557	CovTest	Original	New
cg14449803	Prenatal smoking	first	first	0.0176578	2.94798e-06	0.00469665	-0.000304695	2.34205e-05	CovTest	Original	New
cg15351009	Prenatal smoking	first	first	0.011375	0.000109192	0.0245736	-0.00453941	-0.00519648	CovTest	Original	New
cg17290488	Prenatal smoking	first	first	0.0117909	9.46959e-05	0.02297	0.00712871	0.00708851	CovTest	Original	New
cg17483297	Prenatal smoking	first	first	0.0244419	2.08336e-09	0.000285006	-0.00233927	-0.00378087	CovTest	Original	New
cg18045973	Prenatal smoking	first	first	0.0104296	0.000401041	0.044351	0.00219576	0.00322172	CovTest	Original	New
cg18355133	Prenatal smoking	first	first	0.010086	0.00051451	0.0497402	0.000701627	-8.22653e-05	CovTest	Original	New
cg18454454	Prenatal smoking	second	second	0.0147146	0.000121342	0.0256128	-0.000690086	-0.000284376	CovTest	Original	New
cg18487598	Prenatal smoking	first	first	0.0133619	1.91278e-05	0.0114391	0.00743647	0.00876776	CovTest	Original	New
cg18839637	Prenatal smoking	first	first	0.0173463	2.60066e-05	0.0128833	-0.00448997	-0.00733111	CovTest	Original	New
cg22512163	Prenatal smoking	first	first	0.0108224	0.00046909	0.0474978	0.00166407	0.00373631	CovTest	Original	New
cg22866825	Prenatal smoking	first	first	0.0130426	0.000134616	0.0268117	-0.00188526	-0.00545698	CovTest	Original	New
cg22985016	Prenatal smoking	first	first	0.0119063	0.000159295	0.0290311	0.00979281	0.0129561	CovTest	Original	New
cg23017261	Prenatal smoking	first	first	0.0112936	0.000482718	0.0481905	0.00227798	0.00291343	CovTest	Original	New
cg23065934	Prenatal smoking	first	first	0.0112473	0.00021233	0.032965	-0.00116474	-0.000687318	CovTest	Original	New
cg24842753	Prenatal smoking	first	first	0.0102795	0.00023746	0.0347551	0.00104547	0.00491732	CovTest	Original	New
cg25084851	Prenatal smoking	first	first	0.0104058	0.000259481	0.0361096	0.00427194	0.00586633	CovTest	Original	New
cg25336748	Prenatal smoking	first	first	0.00947859	0.000425386	0.045412	6.48881e-05	-7.99111e-05	CovTest	Original	New
cg25513933	Prenatal smoking	first	first	0.0106817	0.000309408	0.039213	-0.000356667	0.000205515	CovTest	Original	New
cg25595388	Prenatal smoking	first	first	0.0142992	2.79842e-05	0.0133373	-0.00686871	-0.00569783	CovTest	Original	New
cg26126181	Prenatal smoking	first	first	0.00996624	0.000360429	0.04227	0.00194116	0.00225557	CovTest	Original	New
cg26305817	Prenatal smoking	first	first	0.010831	0.000389877	0.0437427	0.000741628	3.22098e-05	CovTest	Original	New
cg26446499	Prenatal smoking	first	first	0.0115049	0.000391836	0.0438395	0.000996951	-0.000613999	CovTest	Original	New
cg26672952	Prenatal smoking	first	first	0.00938478	0.000463865	0.0472185	-0.00151421	-0.000468159	CovTest	Original	New
cg27318774	Prenatal smoking	accumulation	accumulation	0.017801	7.921e-07	0.00267226	NA	NA	CovTest	Original	New
cg00472801	Prenatal smoking	first	first	0.011655	0.000211472	0.0328983	-0.00407082	-0.00419003	CovTest	Original	New
cg00500167	Prenatal smoking	first	first	0.0105612	0.000247083	0.0353934	0.000215184	0.000436611	CovTest	Original	New
cg00651400	Prenatal smoking	first	first	0.0124653	0.000427545	0.0454509	0.00139045	0.000636889	CovTest	Original	New
cg00689580	Prenatal smoking	first	first	0.0123628	0.000104471	0.0241439	-0.000426485	-0.00219492	CovTest	Original	New
cg01138981	Prenatal smoking	first	first	0.0151226	0.00013465	0.0268117	-0.000946037	-0.000337184	CovTest	Original	New
cg01360627	Prenatal smoking	first	first	0.0128771	0.000288094	0.038043	0.00164521	0.00415481	CovTest	Original	New
cg01504718	Prenatal smoking	first	first	0.0106954	0.000414572	0.0450107	0.00190753	0.00300481	CovTest	Original	New
cg01566283	Prenatal smoking	first	first	0.0106877	0.000234706	0.0346168	0.00604331	0.00203529	CovTest	Original	New
cg01886385	Prenatal smoking	first	first	0.0117663	0.000129614	0.0263145	-0.000895177	0.000666727	CovTest	Original	New
cg01949684	Prenatal smoking	first	first	0.0109752	0.000146716	0.0279024	9.75334e-05	0.000684973	CovTest	Original	New
cg03108070	Prenatal smoking	first	first	0.0102705	0.000267266	0.0367476	-0.0016846	-0.0011806	CovTest	Original	New
cg03932459	Prenatal smoking	first	first	0.0097085	0.00048469	0.0482778	-0.00434272	-0.00429795	CovTest	Original	New
cg04014105	Prenatal smoking	first	first	0.0115595	0.000253256	0.0357556	-0.00180378	-0.00141322	CovTest	Original	New
cg05210380	Prenatal smoking	first	first	0.0133903	1.57113e-05	0.0103548	0.00119234	0.00305468	CovTest	Original	New
cg05384135	Prenatal smoking	second	second	0.0107456	0.000261774	0.0362927	-0.000416749	5.0761e-06	CovTest	Original	New
cg07510611	Prenatal smoking	first	first	0.0126789	4.96715e-05	0.0175507	4.90502e-05	0.000132195	CovTest	Original	New
cg07560741	Prenatal smoking	first	first	0.0105546	0.000192747	0.0317227	0.00102647	0.000849319	CovTest	Original	New
cg07946923	Prenatal smoking	second	second	0.0108574	0.000144952	0.0277462	-0.000343345	-0.000177661	CovTest	Original	New
cg08415417	Prenatal smoking	second	second	0.0146833	1.15362e-05	0.00900514	-0.000247794	-3.36527e-05	CovTest	Original	New
cg09399377	Prenatal smoking	first	first	0.0101945	0.00043389	0.0457487	0.000198904	-4.73415e-05	CovTest	Original	New
cg10014874	Prenatal smoking	accumulation	accumulation	0.0143007	8.64228e-05	0.0221082	NA	NA	CovTest	Original	New
cg10426422	Prenatal smoking	first	first	0.011295	0.000278502	0.0374683	-0.00388227	-0.0049386	CovTest	Original	New
cg10433594	Prenatal smoking	first	first	0.0112202	0.000294829	0.0384575	-0.00107039	-0.00113259	CovTest	Original	New
cg10719970	Prenatal smoking	first	first	0.0123691	6.58978e-05	0.0198361	-0.000466103	0.00109544	CovTest	Original	New
cg10819756	Prenatal smoking	first	first	0.012055	5.13016e-05	0.0177982	0.000182682	-2.5774e-06	CovTest	Original	New
cg11251925	Prenatal smoking	first	first	0.0104007	0.000243392	0.0351414	2.66862e-05	0.00242026	CovTest	Original	New
cg11660826	Prenatal smoking	first	first	0.010908	0.000126415	0.0261536	-0.000634087	-0.000333151	CovTest	Original	New
cg12182937	Prenatal smoking	first	first	0.0127341	9.99418e-05	0.0235546	0.0103032	0.0110046	CovTest	Original	New
cg14695524	Prenatal smoking	first	first	0.0140206	7.52668e-05	0.0208538	0.000850124	0.000949162	CovTest	Original	New
cg14746738	Prenatal smoking	second	second	0.0109944	0.000345369	0.041307	0.000662536	9.53269e-05	CovTest	Original	New
cg14747086	Prenatal smoking	first	first	0.0158863	2.653e-05	0.0130379	-0.0126152	-0.0159488	CovTest	Original	New
cg16315106	Prenatal smoking	first	first	0.0130028	6.47887e-05	0.0197352	0.000124179	-0.000153607	CovTest	Original	New
cg16459725	Prenatal smoking	first	first	0.00977095	0.000406853	0.0445461	-0.00228204	-0.00193101	CovTest	Original	New
cg17124478	Prenatal smoking	first	first	0.0126224	8.55566e-05	0.0220532	0.000962042	0.00111576	CovTest	Original	New
cg17161718	Prenatal smoking	first	first	0.0123544	0.00021496	0.0331797	-0.00637099	-0.00575378	CovTest	Original	New
cg17228900	Prenatal smoking	first	first	0.014063	5.18216e-05	0.0179362	0.000272282	0.000273671	CovTest	Original	New
cg17384889	Prenatal smoking	first	first	0.0116135	0.000432388	0.0456285	0.00315648	0.00249023	CovTest	Original	New
cg17753496	Prenatal smoking	first	first	0.0106877	0.00027425	0.0372469	-0.000491282	-6.98108e-05	CovTest	Original	New
cg18204091	Prenatal smoking	second	second	0.0127637	0.000110921	0.0247171	0.000863755	0.00104783	CovTest	Original	New
cg18350186	Prenatal smoking	second	second	0.0149355	5.24387e-06	0.00632507	0.000290595	0.000175662	CovTest	Original	New
cg18392016	Prenatal smoking	first	first	0.014682	6.29277e-05	0.019532	-0.00122328	-0.000900906	CovTest	Original	New
cg18736676	Prenatal smoking	second	second	0.0155929	2.83728e-06	0.00469041	-0.00137076	4.12174e-05	CovTest	Original	New
cg18918349	Prenatal smoking	first	first	0.0130994	7.23421e-05	0.0204949	0.00053618	-0.000250466	CovTest	Original	New
cg21717959	Prenatal smoking	first	first	0.0115436	0.000342386	0.0412166	0.000452308	0.000132383	CovTest	Original	New
cg22367191	Prenatal smoking	first	first	0.0105193	0.000240169	0.0350202	-0.00149838	-0.00152032	CovTest	Original	New
cg22542300	Prenatal smoking	first	first	0.0120101	7.68943e-05	0.0210668	-0.0012545	-0.000513331	CovTest	Original	New
cg22727304	Prenatal smoking	first	first	0.0152008	6.50029e-06	0.0069293	-0.000968707	-0.000580729	CovTest	Original	New
cg23244761	Prenatal smoking	first	first	0.0141576	4.36921e-05	0.0166112	-0.00281853	-0.00144153	CovTest	Original	New
cg23249717	Prenatal smoking	first	first	0.0109831	0.000164777	0.0294815	0.000297476	0.00196947	CovTest	Original	New
cg23505970	Prenatal smoking	first	first	0.0143939	1.25424e-05	0.00934328	-0.00733862	-0.00870083	CovTest	Original	New
cg23627335	Prenatal smoking	first	first	0.0111721	0.000513524	0.0497014	-0.0013524	-0.00171669	CovTest	Original	New
cg23927832	Prenatal smoking	first	first	0.0135666	2.42996e-05	0.012527	0.00211745	0.00033802	CovTest	Original	New
cg25026287	Prenatal smoking	first	first	0.0114838	8.42688e-05	0.0220439	-6.15491e-05	0.000119579	CovTest	Original	New
cg25029615	Prenatal smoking	first	first	0.0119654	0.000354135	0.041844	-0.000262255	-3.37498e-05	CovTest	Original	New
cg26161170	Prenatal smoking	first	first	0.0132421	0.000235516	0.0346568	0.000323087	0.000357915	CovTest	Original	New
cg26361807	Prenatal smoking	first	first	0.0111001	0.00018597	0.0311429	-0.000209799	0.000197173	CovTest	Original	New
cg26418137	Prenatal smoking	first	first	0.0120858	0.000328255	0.0404162	-0.000863445	-0.000688174	CovTest	Original	New
cg26755097	Prenatal smoking	first	first	0.019278	3.43109e-07	0.0018882	8.08802e-05	0.00135573	CovTest	Original	New
cg26805346	Prenatal smoking	first	first	0.00999404	0.000317983	0.0396975	0.00137411	0.0014019	CovTest	Original	New
cg00151571	Prenatal smoking	first	first	0.0100091	0.000438865	0.0459922	-0.000245431	-0.000562619	CovTest	Original	New
cg00234294	Prenatal smoking	first	first	0.0112068	0.000188206	0.031386	0.00107467	0.000801983	CovTest	Original	New
cg00499201	Prenatal smoking	first	first	0.0119344	7.04298e-05	0.0202503	0.00168586	0.00103011	CovTest	Original	New
cg01448276	Prenatal smoking	first	first	0.0104808	0.000182613	0.0309617	0.000280668	-0.000370037	CovTest	Original	New
cg01877967	Prenatal smoking	first	first	0.0164774	1.69865e-06	0.00363065	-5.17531e-05	-2.14545e-05	CovTest	Original	New
cg02096916	Prenatal smoking	first	first	0.0147505	5.44893e-05	0.0184108	-0.000830595	-0.000278704	CovTest	Original	New
cg03473125	Prenatal smoking	first	first	0.0113431	0.000353236	0.0417891	-0.00241831	-0.00124127	CovTest	Original	New
cg03514404	Prenatal smoking	first	first	0.0138013	1.89329e-05	0.0114282	0.000108247	0.000734488	CovTest	Original	New
cg03938320	Prenatal smoking	second	second	0.0117234	0.000306257	0.0390754	0.000315924	-1.2569e-05	CovTest	Original	New
cg03961952	Prenatal smoking	first	first	0.0117661	9.22568e-05	0.0226334	-0.00168235	-0.000470447	CovTest	Original	New
cg04831806	Prenatal smoking	first	first	0.0125855	8.043e-05	0.0214625	-0.000775214	0.00149189	CovTest	Original	New
cg04842472	Prenatal smoking	first	first	0.0164268	4.66207e-06	0.00600756	-0.00590976	-0.00346407	CovTest	Original	New
cg05809668	Prenatal smoking	first	first	0.0116754	0.000371855	0.042778	-0.00202323	-0.00128408	CovTest	Original	New
cg05823605	Prenatal smoking	first	first	0.0104599	0.000211797	0.0329199	0.0040944	0.00255584	CovTest	Original	New
cg08615694	Prenatal smoking	first	first	0.0123044	0.000310562	0.0392894	-0.00131695	0.00277645	CovTest	Original	New
cg09126559	Prenatal smoking	first	first	0.0100049	0.000343671	0.0412402	-0.00101268	-0.000457471	CovTest	Original	New
cg09286367	Prenatal smoking	first	first	0.0145869	6.83351e-05	0.02007	-0.00249027	-0.00141342	CovTest	Original	New
cg09369818	Prenatal smoking	first	first	0.0117296	0.000253683	0.0357556	-0.000233407	-0.000261111	CovTest	Original	New
cg09873282	Prenatal smoking	first	first	0.0134746	0.000141023	0.0273886	0.000403054	0.000257131	CovTest	Original	New
cg10386016	Prenatal smoking	first	first	0.0164626	3.06511e-06	0.00478524	-0.00146486	-0.00382443	CovTest	Original	New
cg10552603	Prenatal smoking	first	first	0.0123901	0.000166912	0.0296307	0.00181765	0.00821295	CovTest	Original	New
cg11124364	Prenatal smoking	first	first	0.011299	0.000127751	0.0261778	-0.0015909	-0.00245535	CovTest	Original	New
cg12431188	Prenatal smoking	first	first	0.0131282	9.50638e-05	0.0230085	0.00239792	0.00362798	CovTest	Original	New
cg12565057	Prenatal smoking	first	first	0.0104169	0.000290299	0.0381625	-0.00649528	-0.00474772	CovTest	Original	New
cg13081331	Prenatal smoking	first	first	0.0116395	8.02253e-05	0.0214625	0.0139381	0.0206411	CovTest	Original	New
cg13279019	Prenatal smoking	first	first	0.0105711	0.000207358	0.032708	0.000104452	0.000118978	CovTest	Original	New
cg13328921	Prenatal smoking	recency	recency	0.0171265	1.04806e-06	0.00292037	NA	NA	CovTest	Original	New
cg13901245	Prenatal smoking	second	second	0.0248343	5.36469e-09	0.00040984	0.000301614	-0.000546346	CovTest	Original	New
cg14018807	Prenatal smoking	first	first	0.0117736	6.38497e-05	0.0196164	-0.000280124	-7.95329e-05	CovTest	Original	New
cg14604568	Prenatal smoking	first	first	0.0100511	0.000367355	0.0425271	-0.000367104	-0.000155097	CovTest	Original	New
cg14833891	Prenatal smoking	first	first	0.0114557	8.64281e-05	0.0221082	-0.000344424	0.00137546	CovTest	Original	New
cg15277378	Prenatal smoking	first	first	0.0127432	0.000298085	0.0386096	0.00169655	0.00138144	CovTest	Original	New
cg15898267	Prenatal smoking	first	first	0.0106876	0.000139635	0.0272739	-0.00109241	-0.000348777	CovTest	Original	New
cg16922937	Prenatal smoking	accumulation	accumulation	0.0119302	0.000164301	0.0294651	NA	NA	CovTest	Original	New
cg17025484	Prenatal smoking	second	second	0.010896	0.000159106	0.0290311	0.000168038	0.000338093	CovTest	Original	New
cg18057109	Prenatal smoking	first	first	0.0143259	9.94944e-06	0.00837416	0.000221976	-0.00131454	CovTest	Original	New
cg18127823	Prenatal smoking	first	first	0.0149036	9.98347e-06	0.00837416	-0.00198695	-0.00108109	CovTest	Original	New
cg18249027	Prenatal smoking	first	first	0.0108157	0.000176952	0.0304861	-0.00110717	0.000518227	CovTest	Original	New
cg18720736	Prenatal smoking	first	first	0.0136996	3.92681e-05	0.015745	-0.0102856	-0.00673416	CovTest	Original	New
cg18935479	Prenatal smoking	first	first	0.0108385	0.00033013	0.040553	-0.000403252	-0.000130879	CovTest	Original	New
cg19042013	Prenatal smoking	first	first	0.014621	3.65939e-05	0.0153581	3.05022e-05	0.0011347	CovTest	Original	New
cg19082909	Prenatal smoking	first	first	0.0111502	0.00044412	0.0462348	0.000732398	0.000122296	CovTest	Original	New
cg19421584	Prenatal smoking	first	first	0.0159044	4.47325e-06	0.00590222	-0.00676285	-0.00802995	CovTest	Original	New
cg20258934	Prenatal smoking	first	first	0.0142674	3.85758e-05	0.015745	-0.000103223	3.92374e-05	CovTest	Original	New
cg20603964	Prenatal smoking	first	first	0.011041	0.000171708	0.0300187	0.000507561	-6.35867e-05	CovTest	Original	New
cg20805005	Prenatal smoking	first	first	0.0111218	0.00022509	0.0338213	0.000283399	0.00137342	CovTest	Original	New
cg20949107	Prenatal smoking	first	first	0.0123307	5.37136e-05	0.0182841	0.00268224	0.00322924	CovTest	Original	New
cg21129976	Prenatal smoking	first	first	0.0111369	0.000314645	0.0395447	0.00167323	0.00202245	CovTest	Original	New
cg21484940	Prenatal smoking	first	first	0.0144402	1.04147e-05	0.008491	0.00612888	0.00903028	CovTest	Original	New
cg22151179	Prenatal smoking	first	first	0.0111129	0.000448081	0.0463552	0.000864319	0.000910856	CovTest	Original	New
cg22168087	Prenatal smoking	first	first	0.00997266	0.000422308	0.045338	-0.00909308	-0.00414593	CovTest	Original	New
cg23015664	Prenatal smoking	first	first	0.0159636	9.18552e-06	0.0080079	0.00104883	0.000203354	CovTest	Original	New
cg23740897	Prenatal smoking	first	first	0.0125998	0.000121296	0.0256128	-0.00125616	-0.000223698	CovTest	Original	New
cg24114936	Prenatal smoking	first	first	0.0106681	0.000153039	0.0284093	-0.000555658	-0.00358251	CovTest	Original	New
cg24139009	Prenatal smoking	first	first	0.013911	2.61027e-05	0.0128833	-0.000935423	-0.000550811	CovTest	Original	New
cg24146409	Prenatal smoking	first	first	0.0149038	4.82848e-06	0.00610854	-0.000615873	0.00104358	CovTest	Original	New
cg25190151	Prenatal smoking	first	first	0.0108162	0.000257025	0.03598	0.00136012	0.00203976	CovTest	Original	New
cg26559707	Prenatal smoking	accumulation	accumulation	0.0142648	0.00036373	0.0423443	NA	NA	CovTest	Original	New
cg26572710	Prenatal smoking	first	first	0.0103226	0.000201187	0.0322439	-0.00121373	-0.0032815	CovTest	Original	New
cg26859186	Prenatal smoking	first	first	0.0127865	0.000247127	0.0353934	-0.000101266	-0.000511047	CovTest	Original	New
cg00185032	Prenatal smoking	first	first	0.0149705	6.63741e-06	0.00699475	0.000670761	0.000660757	CovTest	Original	New
cg03301200	Prenatal smoking	first	first	0.0124498	4.05166e-05	0.0159836	0.000882089	0.000207324	CovTest	Original	New
cg04688051	Prenatal smoking	first	first	0.0113551	0.000409055	0.0447001	-5.2434e-05	-0.000232702	CovTest	Original	New
cg05018671	Prenatal smoking	first	first	0.0123838	0.000149141	0.028096	-0.0006675	0.000635202	CovTest	Original	New
cg05968601	Prenatal smoking	first	first	0.00966753	0.000358846	0.0421404	-8.3382e-05	-0.00134183	CovTest	Original	New
cg06025671	Prenatal smoking	first	first	0.0135467	4.5051e-05	0.0168085	0.00104975	0.000698019	CovTest	Original	New
cg07299736	Prenatal smoking	first	first	0.0130267	0.000178142	0.0305696	0.000920704	0.000412143	CovTest	Original	New
cg07393414	Prenatal smoking	first	first	0.0118455	6.95021e-05	0.0201981	-3.1801e-05	-2.33965e-05	CovTest	Original	New
cg08217567	Prenatal smoking	first	first	0.0149275	8.20338e-06	0.00760357	0.000126198	0.000239714	CovTest	Original	New
cg09067228	Prenatal smoking	first	first	0.012238	0.00017105	0.0300187	0.00443344	0.00654674	CovTest	Original	New
cg11599539	Prenatal smoking	first	first	0.0140553	1.03454e-05	0.008491	-0.00105547	-0.000277624	CovTest	Original	New
cg11774624	Prenatal smoking	first	first	0.0114067	0.00034246	0.0412166	-0.00321694	-0.00148105	CovTest	Original	New
cg12112229	Prenatal smoking	first	first	0.0112933	0.000123192	0.0258268	0.000766193	0.000772884	CovTest	Original	New
cg12865888	Prenatal smoking	first	first	0.0100392	0.000329499	0.0405095	-0.00148283	-0.001437	CovTest	Original	New
cg13924514	Prenatal smoking	first	first	0.0114887	0.000247894	0.0354342	-0.00321453	-0.00157291	CovTest	Original	New
cg14530476	Prenatal smoking	second	second	0.0146033	1.21321e-05	0.00920902	-0.000123987	0.000108191	CovTest	Original	New
cg14843143	Prenatal smoking	first	first	0.01275	0.000211249	0.0328953	-0.0022836	-0.00111032	CovTest	Original	New
cg14907769	Prenatal smoking	first	first	0.0118101	6.73667e-05	0.0199943	-0.000739619	-0.00292413	CovTest	Original	New
cg15301489	Prenatal smoking	first	first	0.014234	8.32442e-05	0.0219192	-0.000726758	-0.000561912	CovTest	Original	New
cg15654626	Prenatal smoking	recency	recency	0.0138355	6.48723e-05	0.0197352	NA	NA	CovTest	Original	New
cg15745205	Prenatal smoking	recency	recency	0.0179357	6.77913e-06	0.00702858	NA	NA	CovTest	Original	New
cg15821716	Prenatal smoking	second	second	0.016274	2.17835e-05	0.0119855	0.0016801	0.00189447	CovTest	Original	New
cg16419441	Prenatal smoking	first	first	0.0131062	0.000140152	0.0272964	-0.00331552	-0.00301416	CovTest	Original	New
cg16577247	Prenatal smoking	first	first	0.013305	0.000294342	0.0384412	0.000539671	0.000424066	CovTest	Original	New
cg17503744	Prenatal smoking	first	first	0.0101041	0.000403801	0.0444875	0.00973014	0.0110493	CovTest	Original	New
cg18506390	Prenatal smoking	first	first	0.0123524	0.000214594	0.0331797	-0.000866537	-0.000631928	CovTest	Original	New
cg19185544	Prenatal smoking	first	first	0.01303	8.85743e-05	0.0224136	0.00345234	0.00406542	CovTest	Original	New
cg20042662	Prenatal smoking	first	first	0.0145306	2.42887e-05	0.012527	-0.00155085	4.52992e-05	CovTest	Original	New
cg20128188	Prenatal smoking	first	first	0.0119312	0.000441505	0.0461425	0.000732181	0.00110464	CovTest	Original	New
cg22227747	Prenatal smoking	first	first	0.0130408	9.25963e-05	0.0226857	0.00370296	0.00589593	CovTest	Original	New
cg23512958	Prenatal smoking	first	first	0.0108003	0.00025163	0.0356671	-0.000659511	-0.00116533	CovTest	Original	New
cg23750142	Prenatal smoking	accumulation	accumulation	0.019177	5.55835e-06	0.00640899	NA	NA	CovTest	Original	New
cg24258699	Prenatal smoking	first	first	0.0138167	1.19733e-05	0.00915161	-0.000969409	-0.00225833	CovTest	Original	New
cg24410546	Prenatal smoking	first	first	0.00968265	0.000500992	0.0490254	0.000470208	0.000249074	CovTest	Original	New
cg24848035	Prenatal smoking	first	first	0.0135331	0.000106832	0.0244077	-0.000346886	-0.0016933	CovTest	Original	New
cg24889466	Prenatal smoking	first	first	0.0110746	0.000297242	0.0385607	0.000715041	0.00218779	CovTest	Original	New
cg25230043	Prenatal smoking	first	first	0.0115874	9.69513e-05	0.0232006	-0.000385851	-5.82384e-05	CovTest	Original	New
cg25642048	Prenatal smoking	first	first	0.0106251	0.000209706	0.032809	4.68658e-05	-6.39384e-05	CovTest	Original	New
cg13611121	Prenatal smoking	first	first	0.0136363	7.28435e-05	0.020584	0.000389492	0.00129148	CovTest	Original	New
cg13732093	Prenatal smoking	first	first	0.0110912	0.000285825	0.0379041	0.000276179	0.00107817	CovTest	Original	New
cg13773148	Prenatal smoking	first	first	0.0109545	0.000153564	0.0284545	-0.00156528	0.000504165	CovTest	Original	New
cg13775295	Prenatal smoking	first	first	0.0163295	2.94351e-06	0.00469665	-0.00482103	-0.00668676	CovTest	Original	New
cg13971025	Prenatal smoking	first	first	0.0135557	1.72506e-05	0.0109347	-0.000774376	0.00141338	CovTest	Original	New
cg14227032	Prenatal smoking	first	first	0.00963314	0.000507702	0.0494621	0.000103301	-6.15629e-05	CovTest	Original	New
cg14282406	Prenatal smoking	first	first	0.0104812	0.000253165	0.0357556	0.00163558	0.00421799	CovTest	Original	New
cg14282937	Prenatal smoking	first	first	0.0149731	4.26527e-06	0.00583257	-0.00109527	-3.46249e-05	CovTest	Original	New
cg20031479	Prenatal smoking	first	first	0.0131711	0.000291714	0.0382408	-0.000524046	-0.000368099	CovTest	Original	New
cg21174344	Prenatal smoking	first	first	0.014193	5.07122e-05	0.0177448	0.00233223	0.00290953	CovTest	Original	New
cg21176263	Prenatal smoking	first	first	0.00982548	0.000336968	0.0410067	0.00454251	0.00448426	CovTest	Original	New
cg00960781	Prenatal smoking	first	first	0.0136153	1.74624e-05	0.0109671	0.00228474	0.00331316	CovTest	Original	New
cg02208820	Prenatal smoking	first	first	0.0124999	0.000126596	0.0261611	-0.00085025	-0.000567606	CovTest	Original	New
cg02541125	Prenatal smoking	first	first	0.0151216	1.00077e-05	0.00837416	0.00412133	0.00493702	CovTest	Original	New
cg02804289	Prenatal smoking	first	first	0.0103558	0.000363233	0.0423394	0.00246058	0.00400129	CovTest	Original	New
cg02899206	Prenatal smoking	first	first	0.00966875	0.000386561	0.0435036	-0.000356365	-0.00019342	CovTest	Original	New
cg02939598	Prenatal smoking	accumulation	accumulation	0.0182303	4.06792e-07	0.00203666	NA	NA	CovTest	Original	New
cg04144333	Prenatal smoking	first	first	0.0122471	0.000330789	0.0406113	0.00672166	0.0112731	CovTest	Original	New
cg05544394	Prenatal smoking	recency	recency	0.0122837	0.000123861	0.0258807	NA	NA	CovTest	Original	New
cg06139794	Prenatal smoking	first	first	0.0130336	3.56261e-05	0.0151176	0.0018668	0.0042211	CovTest	Original	New
cg06188870	Prenatal smoking	first	first	0.0118182	0.000125463	0.026067	0.00342664	0.00400068	CovTest	Original	New
cg07646467	Prenatal smoking	first	first	0.0107132	0.000228781	0.0340624	0.00487714	0.00456539	CovTest	Original	New
cg07957471	Prenatal smoking	first	first	0.0106364	0.000261997	0.0362927	-0.00133212	-0.000714183	CovTest	Original	New
cg08698913	Prenatal smoking	first	first	0.0223655	1.54135e-08	0.00040984	0.000624195	4.11155e-05	CovTest	Original	New
cg09435798	Prenatal smoking	second	second	0.0113345	0.000165431	0.0295106	0.000959924	-8.63891e-06	CovTest	Original	New
cg09667493	Prenatal smoking	first	first	0.0104332	0.000289449	0.0381265	0.00119166	0.00270903	CovTest	Original	New
cg10056132	Prenatal smoking	first	first	0.0110607	0.00051217	0.0496667	-0.00882241	-0.0080072	CovTest	Original	New
cg10961733	Prenatal smoking	first	first	0.0125515	0.00039791	0.0441711	-0.00135306	-0.00166139	CovTest	Original	New
cg11151524	Prenatal smoking	first	first	0.0128655	0.000137102	0.0270188	6.9879e-05	0.000386045	CovTest	Original	New
cg11206067	Prenatal smoking	first	first	0.0112671	0.000153879	0.0284768	-0.000147798	-9.68952e-05	CovTest	Original	New
cg11227075	Prenatal smoking	first	first	0.0126163	0.000303116	0.0388871	-0.00683202	-0.0103682	CovTest	Original	New
cg11276456	Prenatal smoking	second	second	0.0138516	2.45563e-05	0.0126003	-0.000389711	-0.000103831	CovTest	Original	New
cg11342287	Prenatal smoking	first	first	0.0127034	4.46123e-05	0.0167299	0.002562	0.00108948	CovTest	Original	New
cg12101927	Prenatal smoking	first	first	0.0108707	0.000417524	0.0450976	2.31819e-05	-2.49118e-06	CovTest	Original	New
cg12284235	Prenatal smoking	first	first	0.0111351	0.000128018	0.0261778	0.0016041	0.000806053	CovTest	Original	New
cg13244241	Prenatal smoking	first	first	0.0102331	0.00026951	0.0369178	0.000678398	0.000823399	CovTest	Original	New
cg13324547	Prenatal smoking	first	first	0.0188705	9.28443e-07	0.00285751	0.000352215	0.00137963	CovTest	Original	New
cg13587533	Prenatal smoking	second	second	0.01057	0.000502453	0.0490593	-0.000492597	-0.000661486	CovTest	Original	New
cg14218861	Prenatal smoking	first	first	0.0150639	1.10087e-05	0.00876098	-0.00754699	-0.0112477	CovTest	Original	New
cg14588422	Prenatal smoking	first	first	0.010568	0.000451536	0.0464918	0.0026226	0.00154558	CovTest	Original	New
cg14701597	Prenatal smoking	first	first	0.0113474	0.0001986	0.0321098	0.00272082	0.00420092	CovTest	Original	New
cg15613567	Prenatal smoking	first	first	0.0119182	0.000102219	0.0238994	-0.00382132	-0.00495946	CovTest	Original	New
cg15942382	Prenatal smoking	first	first	0.0102827	0.000220261	0.0334847	-0.000481502	-0.000803945	CovTest	Original	New
cg16019809	Prenatal smoking	first	first	0.0100243	0.000294389	0.0384412	-0.000616573	-0.000428961	CovTest	Original	New
cg17484771	Prenatal smoking	first	first	0.0144037	1.16866e-05	0.00909029	-9.39587e-05	0.000177615	CovTest	Original	New
cg17843891	Prenatal smoking	first	first	0.0094843	0.00042944	0.0455466	0.00364891	0.00690088	CovTest	Original	New
cg18022662	Prenatal smoking	first	first	0.0147091	1.98132e-05	0.0114775	-0.00359719	-0.00426452	CovTest	Original	New
cg18139178	Prenatal smoking	first	first	0.0117037	0.000428804	0.0455121	0.00160937	0.0023742	CovTest	Original	New
cg18929335	Prenatal smoking	first	first	0.0127769	4.41912e-05	0.0166831	-0.000102147	0.0047024	CovTest	Original	New
cg19355087	Prenatal smoking	first	first	0.0129627	8.98588e-05	0.0224813	-0.003192	-0.00219671	CovTest	Original	New
cg20475000	Prenatal smoking	first	first	0.0126605	3.41588e-05	0.0148015	-0.000205507	0.000404272	CovTest	Original	New
cg21365287	Prenatal smoking	first	first	0.0118803	8.81223e-05	0.022374	0.000605737	0.00122291	CovTest	Original	New
cg21390852	Prenatal smoking	first	first	0.01235	0.00015793	0.0289003	-0.00665474	-0.00562602	CovTest	Original	New
cg22862208	Prenatal smoking	first	first	0.0116529	0.000248359	0.0354545	-0.00372297	-0.00235142	CovTest	Original	New
cg23071864	Prenatal smoking	first	first	0.0123621	0.000123158	0.0258268	0.00556718	0.0060157	CovTest	Original	New
cg23196346	Prenatal smoking	first	first	0.011706	6.94153e-05	0.0201981	0.0017751	-0.00346638	CovTest	Original	New
cg23763836	Prenatal smoking	first	first	0.0124278	0.000120705	0.0255937	-0.00187469	-0.00209619	CovTest	Original	New
cg23837756	Prenatal smoking	second	second	0.0133315	0.000127709	0.0261778	-0.000407258	-0.000142148	CovTest	Original	New
cg24009737	Prenatal smoking	first	first	0.0115019	0.000135812	0.026946	0.000237049	0.00111003	CovTest	Original	New
cg24031355	Prenatal smoking	first	first	0.0109646	0.000384488	0.043359	-0.000600256	-0.000169358	CovTest	Original	New
cg24255928	Prenatal smoking	first	first	0.0152917	2.3046e-05	0.0121949	-0.000797159	-0.000189816	CovTest	Original	New
cg24812143	Prenatal smoking	first	first	0.0120065	6.71144e-05	0.0199646	0.00168427	0.0029682	CovTest	Original	New
cg25737283	Prenatal smoking	first	first	0.0103405	0.000342783	0.0412217	0.00431045	0.00405736	CovTest	Original	New
cg25825488	Prenatal smoking	first	first	0.0124111	0.000223974	0.0337692	-0.00174995	-0.00146092	CovTest	Original	New
cg26245549	Prenatal smoking	second	second	0.0130432	4.69785e-05	0.0170931	-0.00730167	-0.00500111	CovTest	Original	New
cg26439641	Prenatal smoking	second	second	0.0152376	1.19002e-05	0.00913149	-0.000721153	-0.000125381	CovTest	Original	New
cg26465389	Prenatal smoking	first	first	0.0132071	0.000345347	0.041307	0.000226552	-0.000393638	CovTest	Original	New
cg26597838	Prenatal smoking	first	first	0.0101183	0.000335725	0.040932	0.00361963	-0.0107759	CovTest	Original	New
cg26843035	Prenatal smoking	first	first	0.0155793	1.05395e-05	0.00851395	3.9393e-05	-0.000133319	CovTest	Original	New
cg27231782	Prenatal smoking	first	first	0.0251086	2.58945e-09	0.000285006	0.00100222	0.000106747	CovTest	Original	New
cg27547703	Prenatal smoking	first	first	0.0116388	0.000298667	0.0386509	0.00291027	0.00744662	CovTest	Original	New
cg27596297	Prenatal smoking	first	first	0.0124392	5.98627e-05	0.0191255	0.00202928	0.00134098	CovTest	Original	New
cg00450824	Prenatal smoking	first	first	0.0116689	0.000476582	0.0478166	-0.00056015	-0.00017988	CovTest	Original	New
cg01068102	Prenatal smoking	first	first	0.0112065	0.00022818	0.0340426	-0.000140806	-0.000132508	CovTest	Original	New
cg01086895	Prenatal smoking	first	first	0.0110263	0.000200134	0.0322043	-0.000144756	-0.00179466	CovTest	Original	New
cg01162104	Prenatal smoking	second	second	0.0192355	6.2434e-06	0.00673701	-0.000220286	-0.000111374	CovTest	Original	New
cg01839297	Prenatal smoking	first	first	0.0110863	0.000119336	0.0254547	-8.67659e-05	2.38809e-05	CovTest	Original	New
cg03124680	Prenatal smoking	accumulation	accumulation	0.0195872	1.66528e-05	0.0107343	NA	NA	CovTest	Original	New
cg03638937	Prenatal smoking	first	first	0.010967	0.000406433	0.0445223	-0.000907945	0.000505857	CovTest	Original	New
cg04260258	Prenatal smoking	first	first	0.012034	8.90208e-05	0.0224804	-2.49521e-05	0.000134881	CovTest	Original	New
cg05059605	Prenatal smoking	first	first	0.0109333	0.000223305	0.033703	-0.000147492	-0.000170994	CovTest	Original	New
cg05745100	Prenatal smoking	first	first	0.0127488	9.01281e-05	0.0224813	-0.000130015	0.000180476	CovTest	Original	New
cg06473449	Prenatal smoking	first	first	0.0132144	4.73642e-05	0.0171625	-0.00386998	-0.00545182	CovTest	Original	New
cg07489413	Prenatal smoking	first	first	0.0110164	0.000183906	0.0309869	0.00103855	0.000490969	CovTest	Original	New
cg08056990	Prenatal smoking	first	first	0.0128478	6.66043e-05	0.0198885	-0.00111839	0.00149114	CovTest	Original	New
cg08224787	Prenatal smoking	first	first	0.0117486	7.97509e-05	0.0214193	-0.000184222	-0.000228672	CovTest	Original	New
cg08436798	Prenatal smoking	first	first	0.0118519	0.000159369	0.0290311	-9.32486e-05	0.000168095	CovTest	Original	New
cg09344943	Prenatal smoking	first	first	0.0099171	0.000338107	0.0410347	-0.000309211	-3.08879e-05	CovTest	Original	New
cg10911054	Prenatal smoking	first	first	0.0116833	0.0004512	0.0464918	-0.000223265	-0.000469588	CovTest	Original	New
cg11317774	Prenatal smoking	accumulation	accumulation	0.0240331	5.61237e-09	0.00040984	NA	NA	CovTest	Original	New
cg11766552	Prenatal smoking	second	second	0.010398	0.000374397	0.0428825	-0.00273406	-0.000968295	CovTest	Original	New
cg11791770	Prenatal smoking	first	first	0.0109178	0.000386753	0.0435083	0.00155378	0.00187604	CovTest	Original	New
cg12229151	Prenatal smoking	first	first	0.0109882	0.000185916	0.0311429	0.00706322	0.00927148	CovTest	Original	New
cg13103303	Prenatal smoking	first	first	0.013769	2.6245e-05	0.012939	-0.000199068	4.2834e-06	CovTest	Original	New
cg13177786	Prenatal smoking	accumulation	accumulation	0.0104636	0.000361577	0.0423032	NA	NA	CovTest	Original	New
cg13247673	Prenatal smoking	first	first	0.0127879	4.56198e-05	0.0168583	-0.0043582	-0.00240281	CovTest	Original	New
cg14911132	Prenatal smoking	first	first	0.0125309	4.33884e-05	0.0165589	-0.00331083	-0.00379713	CovTest	Original	New
cg15393937	Prenatal smoking	first	first	0.0128194	0.000256307	0.0359367	-0.00589586	-0.0054216	CovTest	Original	New
cg15641024	Prenatal smoking	first	first	0.0164747	3.07241e-05	0.0141195	-0.00348322	-0.00337716	CovTest	Original	New
cg16258018	Prenatal smoking	first	first	0.0106451	0.000181518	0.0309028	0.00402757	0.00465663	CovTest	Original	New
cg17641649	Prenatal smoking	first	first	0.0125497	0.000447855	0.0463552	-0.00423195	-0.00768917	CovTest	Original	New
cg18032502	Prenatal smoking	accumulation	accumulation	0.011039	0.000168212	0.0297296	NA	NA	CovTest	Original	New
cg18296784	Prenatal smoking	first	first	0.0099372	0.000460919	0.0470492	-0.00201052	-0.00100636	CovTest	Original	New
cg18496140	Prenatal smoking	first	first	0.0118805	7.59854e-05	0.020869	-0.00502131	-0.00258452	CovTest	Original	New
cg18507871	Prenatal smoking	second	second	0.010891	0.000211836	0.0329199	0.000376614	-2.4473e-05	CovTest	Original	New
cg19844840	Prenatal smoking	first	first	0.0113886	0.00033969	0.0411182	-0.000180626	-6.91166e-05	CovTest	Original	New
cg19943238	Prenatal smoking	first	first	0.0102708	0.000319087	0.0397624	-0.00226624	0.000188985	CovTest	Original	New
cg20382233	Prenatal smoking	first	first	0.00988759	0.000466285	0.0473554	-0.000255464	-0.000115523	CovTest	Original	New
cg20809378	Prenatal smoking	first	first	0.0111103	0.00026191	0.0362927	-0.000308937	-0.000346373	CovTest	Original	New
cg21638242	Prenatal smoking	first	first	0.0107301	0.000199423	0.0321719	0.000759885	0.00133036	CovTest	Original	New
cg21655083	Prenatal smoking	first	first	0.0112572	0.000345969	0.0413227	0.000586829	0.000311874	CovTest	Original	New
cg22110770	Prenatal smoking	first	first	0.0119715	0.0003868	0.0435083	-0.000490326	-0.00112263	CovTest	Original	New
cg22209355	Prenatal smoking	first	first	0.0129017	2.709e-05	0.013164	-0.0070983	-0.00886004	CovTest	Original	New
cg22280167	Prenatal smoking	first	first	0.0102176	0.000424108	0.0453569	-0.00376845	0.000449589	CovTest	Original	New
cg22947532	Prenatal smoking	first	first	0.0110034	0.00014953	0.0281332	-0.00318707	-0.0021372	CovTest	Original	New
cg23675536	Prenatal smoking	first	first	0.0125373	0.000179005	0.0306647	0.00264977	0.00258582	CovTest	Original	New
cg23676551	Prenatal smoking	first	first	0.0118345	0.000203784	0.0324691	-0.004447	-0.00482726	CovTest	Original	New
cg24960947	Prenatal smoking	first	first	0.0144832	2.40568e-05	0.0124749	-0.00322575	-0.00384479	CovTest	Original	New
cg25504403	Prenatal smoking	first	first	0.00993206	0.000354885	0.0418774	-0.000630287	1.04309e-05	CovTest	Original	New
cg26030804	Prenatal smoking	second	second	0.0108999	0.000127771	0.0261778	-7.82297e-05	3.60854e-05	CovTest	Original	New
cg26284613	Prenatal smoking	first	first	0.0158779	4.88174e-06	0.00613596	0.000404316	0.000258206	CovTest	Original	New
cg26898376	Prenatal smoking	first	first	0.0099702	0.000301502	0.038794	-0.000675595	9.59589e-05	CovTest	Original	New
cg27624702	Prenatal smoking	first	first	0.01185	0.000146956	0.0279234	0.000450629	8.40695e-05	CovTest	Original	New
cg00040312	Prenatal smoking	first	first	0.0134207	4.7325e-05	0.0171624	-0.000652984	3.13934e-05	CovTest	Original	New
cg00585698	Prenatal smoking	first	first	0.0114489	0.000362745	0.0423228	-0.000157143	-0.00101201	CovTest	Original	New
cg00853733	Prenatal smoking	first	first	0.0114381	0.000192107	0.0316647	-0.00247083	-0.0029092	CovTest	Original	New
cg01168890	Prenatal smoking	accumulation	accumulation	0.0114073	0.000162551	0.0294133	NA	NA	CovTest	Original	New
cg01282712	Prenatal smoking	first	first	0.0118168	0.000209956	0.0328208	0.00245841	0.00265371	CovTest	Original	New
cg02385840	Prenatal smoking	first	first	0.017084	5.73859e-06	0.00651148	0.00193438	-0.00101751	CovTest	Original	New
cg02504820	Prenatal smoking	first	first	0.0141552	3.59939e-05	0.0152078	0.0042185	0.00395683	CovTest	Original	New
cg02856952	Prenatal smoking	first	first	0.0116498	7.40479e-05	0.0207116	-9.64288e-05	0.000352116	CovTest	Original	New
cg03954086	Prenatal smoking	first	first	0.014335	8.95855e-05	0.0224813	-0.00257238	0.00304599	CovTest	Original	New
cg07106761	Prenatal smoking	first	first	0.0156308	5.63504e-05	0.018679	-0.00105246	-0.00200825	CovTest	Original	New
cg07706687	Prenatal smoking	first	first	0.0144553	2.16474e-05	0.0119429	0.00015367	-0.000423829	CovTest	Original	New
cg09781971	Prenatal smoking	first	first	0.0156368	3.09168e-05	0.014149	-0.00388022	-0.00198781	CovTest	Original	New
cg09973284	Prenatal smoking	first	first	0.0117977	0.000261169	0.0362534	-0.00101166	-0.000972281	CovTest	Original	New
cg10530560	Prenatal smoking	first	first	0.0162657	4.06431e-06	0.00569853	-0.000327338	-0.000755727	CovTest	Original	New
cg10653000	Prenatal smoking	first	first	0.0102277	0.000503895	0.0491783	0.0013433	0.00462749	CovTest	Original	New
cg11026555	Prenatal smoking	first	first	0.0117978	7.8513e-05	0.0212321	0.000903322	4.32544e-05	CovTest	Original	New
cg11551216	Prenatal smoking	first	first	0.0186928	1.00413e-06	0.00288938	0.000373386	-0.00134441	CovTest	Original	New
cg11598715	Prenatal smoking	first	first	0.0146884	9.28942e-06	0.0080452	-0.000895704	5.43206e-05	CovTest	Original	New
cg11899507	Prenatal smoking	second	second	0.0133529	0.000220134	0.0334847	0.00394484	0.000283791	CovTest	Original	New
cg12699044	Prenatal smoking	first	first	0.0103837	0.000369024	0.0426083	-0.00162358	0.000382265	CovTest	Original	New
cg13204290	Prenatal smoking	second	second	0.0139952	0.000205055	0.0325146	-0.000123806	-7.87284e-05	CovTest	Original	New
cg13691247	Prenatal smoking	first	first	0.0146999	7.81074e-05	0.0211984	-0.000909519	-0.000291621	CovTest	Original	New
cg13702005	Prenatal smoking	first	first	0.01097	0.000314399	0.0395362	-0.000560047	-0.000366271	CovTest	Original	New
cg13821287	Prenatal smoking	first	first	0.0132776	0.000239563	0.0349583	0.00336567	0.00283443	CovTest	Original	New
cg14858786	Prenatal smoking	first	first	0.0132671	3.09785e-05	0.0141578	-0.00156845	-0.0012122	CovTest	Original	New
cg15335104	Prenatal smoking	first	first	0.0151344	1.00241e-05	0.00837416	-0.000310836	0.00374739	CovTest	Original	New
cg16110759	Prenatal smoking	first	first	0.0136745	0.000190286	0.0315416	-0.00150968	-0.00440776	CovTest	Original	New
cg16345521	Prenatal smoking	second	second	0.0116644	0.000446462	0.0463115	0.000754403	0.000534906	CovTest	Original	New
cg16409977	Prenatal smoking	first	first	0.0110142	0.000473406	0.0477371	0.00530006	0.00632199	CovTest	Original	New
cg16611278	Prenatal smoking	first	first	0.0104617	0.000386054	0.0434577	0.00199533	0.00264189	CovTest	Original	New
cg17630885	Prenatal smoking	first	first	0.0118484	0.000156796	0.0287507	-0.0030704	0.000140248	CovTest	Original	New
cg19232929	Prenatal smoking	first	first	0.0139697	7.78213e-05	0.0211882	0.00204854	0.00272164	CovTest	Original	New
cg19656577	Prenatal smoking	first	first	0.0106522	0.000313883	0.0395165	-0.00044452	-0.00142972	CovTest	Original	New
cg19904398	Prenatal smoking	second	second	0.0155853	2.91098e-06	0.00469665	0.000962147	0.000519221	CovTest	Original	New
cg20056593	Prenatal smoking	first	first	0.0109248	0.000243568	0.0351414	-0.00134646	0.000533868	CovTest	Original	New
cg20132724	Prenatal smoking	first	first	0.0117466	0.000316047	0.039608	0.000839236	0.000293378	CovTest	Original	New
cg20971970	Prenatal smoking	first	first	0.0109941	0.000438191	0.0459763	-0.00701993	-0.00687582	CovTest	Original	New
cg22251385	Prenatal smoking	first	first	0.0117819	0.000283855	0.0378236	0.00186291	0.00280167	CovTest	Original	New
cg22318509	Prenatal smoking	first	first	0.0101554	0.000426535	0.0454509	0.00108882	0.00202683	CovTest	Original	New
cg22511293	Prenatal smoking	first	first	0.0165197	5.90839e-06	0.00660205	-0.000171579	-0.000118268	CovTest	Original	New
cg23422156	Prenatal smoking	first	first	0.0169077	5.1001e-06	0.00626154	-0.00103862	-0.00211901	CovTest	Original	New
cg24775180	Prenatal smoking	first	first	0.010132	0.000334416	0.0408424	-0.000413377	0.00127637	CovTest	Original	New
cg25041172	Prenatal smoking	first	first	0.0126198	3.43935e-05	0.0148015	-0.000346895	0.000144687	CovTest	Original	New
cg25217365	Prenatal smoking	first	first	0.012015	0.000140291	0.0273051	-0.000368733	-0.000285729	CovTest	Original	New
cg25754673	Prenatal smoking	first	first	0.0127082	0.000102871	0.0239794	-0.000340053	0.00227768	CovTest	Original	New
cg26621607	Prenatal smoking	first	first	0.0138083	0.000150182	0.0281596	0.0011382	0.0097565	CovTest	Original	New
cg27405626	Prenatal smoking	second	second	0.00983469	0.000376834	0.0429025	0.00277817	0.00530004	CovTest	Original	New
cg27504292	Prenatal smoking	first	first	0.0113827	0.000412481	0.0448943	0.00100831	0.000292354	CovTest	Original	New
cg02283624	Prenatal smoking	first	first	0.0115478	0.000248266	0.0354527	0.00092422	0.00128033	CovTest	Original	New
cg02861260	Prenatal smoking	first	first	0.0095889	0.000473211	0.0477371	-0.000224794	0.000824061	CovTest	Original	New
cg03696393	Prenatal smoking	first	first	0.0141655	1.30585e-05	0.00953415	0.00107212	0.00064215	CovTest	Original	New
cg03966514	Prenatal smoking	second	second	0.0123504	0.000221105	0.0335628	0.00437928	0.00826067	CovTest	Original	New
cg04579095	Prenatal smoking	first	first	0.0148707	6.83075e-06	0.00705841	0.000126188	-2.2858e-05	CovTest	Original	New
cg04762397	Prenatal smoking	first	first	0.0166628	7.73723e-06	0.00748652	5.83211e-05	-2.23609e-05	CovTest	Original	New
cg06179060	Prenatal smoking	first	first	0.0153748	2.22313e-05	0.012004	-1.29099e-05	-7.27408e-05	CovTest	Original	New
cg06832986	Prenatal smoking	first	first	0.0118277	0.000226866	0.0339732	0.00292516	0.00294107	CovTest	Original	New
cg07949720	Prenatal smoking	first	first	0.0142618	6.28198e-05	0.0195179	-0.000318777	-0.000828011	CovTest	Original	New
cg09031522	Prenatal smoking	first	first	0.0128422	6.11221e-05	0.0192865	0.00167366	0.000809247	CovTest	Original	New
cg10298859	Prenatal smoking	first	first	0.0110214	0.000115922	0.0252033	-0.000347882	0.00364841	CovTest	Original	New
cg10334247	Prenatal smoking	first	first	0.0121422	0.000140922	0.0273886	-0.00274489	-0.000754887	CovTest	Original	New
cg11423130	Prenatal smoking	second	second	0.0117161	0.000239534	0.0349583	0.00329476	0.00313602	CovTest	Original	New
cg12648482	Prenatal smoking	first	first	0.0103129	0.000394578	0.0439564	-0.000936837	-0.000473225	CovTest	Original	New
cg14290855	Prenatal smoking	first	first	0.0167683	3.87432e-06	0.00557417	0.00361848	0.00525724	CovTest	Original	New
cg15020568	Prenatal smoking	first	first	0.0125764	3.52917e-05	0.0150411	-0.00232138	-0.00298977	CovTest	Original	New
cg16423505	Prenatal smoking	second	second	0.0168389	2.35774e-05	0.0123352	0.00027698	0.000221782	CovTest	Original	New
cg19512693	Prenatal smoking	first	first	0.011467	0.00035442	0.0418664	0.000923685	0.00158974	CovTest	Original	New
cg19734822	Prenatal smoking	first	first	0.0102415	0.000314726	0.0395447	0.000994081	0.00400754	CovTest	Original	New
cg20705908	Prenatal smoking	first	first	0.0135127	6.30716e-05	0.019532	0.000407124	0.00137301	CovTest	Original	New
cg22125968	Prenatal smoking	accumulation	accumulation	0.0220235	4.42557e-06	0.00588637	NA	NA	CovTest	Original	New
cg22191606	Prenatal smoking	first	first	0.0125958	5.88683e-05	0.0189592	-0.000763119	-0.00596994	CovTest	Original	New
cg24030614	Prenatal smoking	first	first	0.0158035	1.61175e-05	0.0104968	0.0037575	0.00437791	CovTest	Original	New
cg25927529	Prenatal smoking	first	first	0.012761	0.000228167	0.0340426	0.000851997	-0.00089512	CovTest	Original	New
cg26574754	Prenatal smoking	first	first	0.0137197	2.98583e-05	0.0138957	-0.000154308	-0.000212563	CovTest	Original	New
cg27127272	Prenatal smoking	first	first	0.01146	0.000132648	0.0266298	-0.00154272	-1.62152e-05	CovTest	Original	New
cg01515732	Prenatal smoking	first	first	0.0168367	5.81141e-06	0.00654637	-8.14155e-05	-0.00156016	CovTest	Original	New
cg02995680	Prenatal smoking	first	first	0.0128394	0.000116969	0.0253086	-0.00110585	0.000414209	CovTest	Original	New
cg04297664	Prenatal smoking	first	first	0.0140735	0.000100453	0.0236497	0.000249538	0.000298378	CovTest	Original	New
cg04948941	Prenatal smoking	first	first	0.0136063	0.000182787	0.0309617	-0.000745833	-0.00115973	CovTest	Original	New
cg05179529	Prenatal smoking	first	first	0.0154361	1.93813e-05	0.0114775	-0.00136931	-0.000595716	CovTest	Original	New
cg07484315	Prenatal smoking	recency	recency	0.0111755	0.000445938	0.0462927	NA	NA	CovTest	Original	New
cg10101773	Prenatal smoking	first	first	0.0163058	6.49856e-05	0.0197352	-0.00156748	-0.00466418	CovTest	Original	New
cg10504545	Prenatal smoking	first	first	0.0179331	2.14522e-05	0.0119393	0.000324541	-0.000381037	CovTest	Original	New
cg11795222	Prenatal smoking	first	first	0.0138013	3.84672e-05	0.0157393	-0.00436675	-0.00443254	CovTest	Original	New
cg13166942	Prenatal smoking	accumulation	accumulation	0.0186955	1.27855e-05	0.00940738	NA	NA	CovTest	Original	New
cg13546414	Prenatal smoking	first	first	0.0123777	0.00013653	0.0269544	-0.00428484	-0.00368295	CovTest	Original	New
cg13635455	Prenatal smoking	first	first	0.00988628	0.000467501	0.0474022	-0.000439555	-0.000340923	CovTest	Original	New
cg14144229	Prenatal smoking	first	first	0.0122672	0.000129702	0.0263145	0.0035014	0.00373977	CovTest	Original	New
cg15901216	Prenatal smoking	second	second	0.0130692	2.86531e-05	0.0135351	-0.000270021	-0.000339465	CovTest	Original	New
cg16559695	Prenatal smoking	first	first	0.0126651	0.000440287	0.0460974	0.000707509	0.000211227	CovTest	Original	New
cg18876990	Prenatal smoking	first	first	0.0111469	0.000438838	0.0459922	-3.08952e-05	0.000522195	CovTest	Original	New
cg21498220	Prenatal smoking	first	first	0.0115258	0.000217657	0.0332766	0.00204416	0.00152291	CovTest	Original	New
cg22817421	Prenatal smoking	first	first	0.0106349	0.000494531	0.0486745	-0.000404077	-5.72476e-05	CovTest	Original	New
cg22903286	Prenatal smoking	first	first	0.0129032	0.000193546	0.0317607	-0.000700339	-0.000261477	CovTest	Original	New
cg23209098	Prenatal smoking	first	first	0.0110575	0.000285584	0.0379039	-9.17565e-05	-0.000267647	CovTest	Original	New
cg23251248	Prenatal smoking	first	first	0.0106631	0.000409639	0.0447287	0.00672296	0.00369758	CovTest	Original	New
cg26254637	Prenatal smoking	first	first	0.0116376	0.000265242	0.036572	-0.000304548	-0.00026465	CovTest	Original	New
cg00502209	Prenatal smoking	first	first	0.014175	0.000138832	0.0272179	-0.000509644	-0.00112309	CovTest	Original	New
cg00774088	Prenatal smoking	first	first	0.0121324	7.1722e-05	0.0204244	-0.00167152	-0.00111102	CovTest	Original	New
cg03479535	Prenatal smoking	recency	recency	0.0101455	0.000478337	0.047869	NA	NA	CovTest	Original	New
cg08197226	Prenatal smoking	first	first	0.011209	0.000206098	0.0326154	0.000249539	-7.68137e-05	CovTest	Original	New
cg08889009	Prenatal smoking	first	first	0.0104071	0.000208614	0.0327769	-0.00350327	-0.00212472	CovTest	Original	New
cg09638395	Prenatal smoking	first	first	0.011163	0.000228003	0.0340426	-0.00363412	-0.00173385	CovTest	Original	New
cg11408395	Prenatal smoking	first	first	0.0115966	0.000304283	0.038988	0.000914579	-0.000704157	CovTest	Original	New
cg12045511	Prenatal smoking	first	first	0.0109289	0.00014256	0.0275594	0.000524668	0.00169998	CovTest	Original	New
cg12495676	Prenatal smoking	first	first	0.014483	6.65729e-06	0.00699503	0.00220081	0.00453385	CovTest	Original	New
cg13331940	Prenatal smoking	first	first	0.0135284	0.000145964	0.0278758	-0.000284179	-0.000126402	CovTest	Original	New
cg13950367	Prenatal smoking	first	first	0.0143589	0.000339081	0.0410908	-0.000384229	-4.30721e-05	CovTest	Original	New
cg14496909	Prenatal smoking	first	first	0.0127191	9.86087e-05	0.0233773	0.00237915	0.00452085	CovTest	Original	New
cg16149030	Prenatal smoking	first	first	0.0147104	1.92854e-05	0.0114584	0.000216246	0.000364228	CovTest	Original	New
cg16968596	Prenatal smoking	second	second	0.0128488	3.77364e-05	0.0155431	-0.000235253	-0.00013842	CovTest	Original	New
cg21033116	Prenatal smoking	first	first	0.0140581	4.13354e-05	0.0161485	0.000152911	0.00231721	CovTest	Original	New
cg21382768	Prenatal smoking	accumulation	accumulation	0.0140891	3.19794e-05	0.0143518	NA	NA	CovTest	Original	New
cg21385909	Prenatal smoking	first	first	0.0108662	0.00013803	0.0271289	-0.0083601	-0.0103907	CovTest	Original	New
cg22054756	Prenatal smoking	first	first	0.010449	0.000237752	0.0347703	-0.00313198	-0.00151164	CovTest	Original	New
cg22063206	Prenatal smoking	first	first	0.0121012	0.000424458	0.0453569	0.0070414	0.00978138	CovTest	Original	New
cg23298047	Prenatal smoking	first	first	0.0126598	2.95491e-05	0.0137809	0.000305977	-0.0023159	CovTest	Original	New
cg24332921	Prenatal smoking	accumulation	accumulation	0.0137721	7.40074e-05	0.0207116	NA	NA	CovTest	Original	New
cg25176742	Prenatal smoking	first	first	0.0135164	2.7738e-05	0.0133172	0.00041835	0.000141477	CovTest	Original	New
cg25623774	Prenatal smoking	first	first	0.0126513	0.000176751	0.0304861	0.00455442	0.00359625	CovTest	Original	New
cg25651615	Prenatal smoking	first	first	0.0121173	0.00044285	0.0462007	-8.63682e-05	7.7579e-06	CovTest	Original	New
cg26971783	Prenatal smoking	first	first	0.0107138	0.000306084	0.0390754	-0.00134	-0.00328752	CovTest	Original	New
cg00052433	Prenatal smoking	second	second	0.0142111	0.000107477	0.0244344	0.00644669	0.00632133	CovTest	Original	New
cg00377849	Prenatal smoking	first	first	0.00994975	0.000324222	0.0401581	-0.000239436	-0.000258175	CovTest	Original	New
cg00468846	Prenatal smoking	first	first	0.0103387	0.000431208	0.0456059	0.00242512	0.00372836	CovTest	Original	New
cg01519508	Prenatal smoking	first	first	0.0117778	0.000242672	0.0350913	0.00246524	0.00295743	CovTest	Original	New
cg01683948	Prenatal smoking	first	first	0.0100942	0.00025281	0.0357538	-0.000317994	0.00028709	CovTest	Original	New
cg01891736	Prenatal smoking	first	first	0.0118616	5.64535e-05	0.018679	0.0010582	-0.00108956	CovTest	Original	New
cg02030929	Prenatal smoking	first	first	0.0129625	5.37998e-05	0.0182841	-0.00107085	-0.000292177	CovTest	Original	New
cg02077558	Prenatal smoking	first	first	0.011555	0.000136384	0.0269544	0.00146874	0.00196655	CovTest	Original	New
cg02131512	Prenatal smoking	first	first	0.0125117	0.00033849	0.041053	-0.00114852	-0.00205017	CovTest	Original	New
cg02282640	Prenatal smoking	first	first	0.0149854	1.85707e-05	0.0113083	-0.000478305	0.00154746	CovTest	Original	New
cg02426611	Prenatal smoking	first	first	0.0141013	1.47979e-05	0.0100756	0.000423224	-0.000565708	CovTest	Original	New
cg02534657	Prenatal smoking	first	first	0.0139921	0.000205495	0.0325552	-0.00140993	0.00298007	CovTest	Original	New
cg03415617	Prenatal smoking	first	first	0.0101495	0.000361412	0.0423032	-0.0122899	-0.0178416	CovTest	Original	New
cg03553080	Prenatal smoking	first	first	0.0109145	0.00021505	0.0331797	0.00102528	0.00169509	CovTest	Original	New
cg04060308	Prenatal smoking	first	first	0.0106893	0.000278266	0.0374644	-4.28692e-05	0.000693676	CovTest	Original	New
cg04495354	Prenatal smoking	first	first	0.00943204	0.000484459	0.0482658	0.00255858	-0.000770756	CovTest	Original	New
cg04580029	Prenatal smoking	first	first	0.0108905	0.000515823	0.0498002	-0.000199635	-9.96461e-05	CovTest	Original	New
cg04613165	Prenatal smoking	first	first	0.00942503	0.000470451	0.047579	0.00229704	0.00325065	CovTest	Original	New
cg04897892	Prenatal smoking	first	first	0.0113207	0.000142604	0.0275594	0.00172852	0.000657827	CovTest	Original	New
cg04961397	Prenatal smoking	first	first	0.0105094	0.000329828	0.0405273	-0.000332827	-8.34299e-05	CovTest	Original	New
cg05012676	Prenatal smoking	first	first	0.0167027	1.04042e-05	0.008491	-0.00202681	-0.00150645	CovTest	Original	New
cg05194102	Prenatal smoking	first	first	0.0182977	5.64405e-07	0.00243611	0.000110957	-0.00152586	CovTest	Original	New
cg05218653	Prenatal smoking	first	first	0.0126783	0.00037058	0.0426936	1.36348e-05	-0.000215066	CovTest	Original	New
cg05274242	Prenatal smoking	first	first	0.0134842	0.000106037	0.0243269	0.0101217	0.00630629	CovTest	Original	New
cg05521581	Prenatal smoking	first	first	0.0170438	1.18036e-06	0.0031881	0.00174134	0.00162236	CovTest	Original	New
cg05547152	Prenatal smoking	first	first	0.0110243	0.000114218	0.0250253	-0.000147165	0.000570296	CovTest	Original	New
cg05550276	Prenatal smoking	first	first	0.0137704	0.00016388	0.02946	-0.00328756	-0.00246213	CovTest	Original	New
cg05926918	Prenatal smoking	first	first	0.0138083	1.27924e-05	0.00940738	-0.000594463	-0.000454377	CovTest	Original	New
cg06214241	Prenatal smoking	first	first	0.0115184	0.000378604	0.0429817	0.000107242	0.000262708	CovTest	Original	New
cg06841192	Prenatal smoking	first	first	0.00960039	0.000361527	0.0423032	-0.00142551	-0.00213318	CovTest	Original	New
cg07221183	Prenatal smoking	first	first	0.0111548	0.000207049	0.0326954	0.00294274	0.00439724	CovTest	Original	New
cg07443485	Prenatal smoking	first	first	0.0108644	0.00021017	0.0328233	-8.65162e-06	0.000117343	CovTest	Original	New
cg07455504	Prenatal smoking	first	first	0.0126362	0.000250076	0.0355448	-0.000605298	6.05107e-05	CovTest	Original	New
cg07482826	Prenatal smoking	second	second	0.0134406	0.000196556	0.0319509	-0.000423116	1.31192e-05	CovTest	Original	New
cg07695654	Prenatal smoking	first	first	0.0117687	6.31512e-05	0.0195381	-0.000581709	-0.00169541	CovTest	Original	New
cg08054541	Prenatal smoking	first	first	0.00940755	0.000440633	0.0461117	0.000564758	0.00163266	CovTest	Original	New
cg09364677	Prenatal smoking	first	first	0.0121236	0.000205384	0.0325492	-0.00275183	0.00125887	CovTest	Original	New
cg16364805	Prenatal smoking	first	first	0.0146156	2.16354e-05	0.0119429	0.00179444	0.00133769	CovTest	Original	New
cg16428612	Prenatal smoking	first	first	0.011395	0.000179568	0.0307311	3.43489e-05	-0.000592039	CovTest	Original	New
cg18427589	Prenatal smoking	recency	recency	0.0158622	8.59102e-05	0.0220797	NA	NA	CovTest	Original	New
cg26465602	Prenatal smoking	first	first	0.0102883	0.00048656	0.0483111	0.00263016	0.00149436	CovTest	Original	New
cg26516710	Prenatal smoking	first	first	0.0100517	0.000512647	0.0496762	0.00235811	0.00148165	CovTest	Original	New
cg26598918	Prenatal smoking	first	first	0.0109669	0.000363832	0.0423443	0.000821364	0.0020205	CovTest	Original	New
cg26974318	Prenatal smoking	first	first	0.0114689	0.000110817	0.0247171	0.000393681	9.90103e-05	CovTest	Original	New
cg26982323	Prenatal smoking	first	first	0.0117516	0.000108065	0.0244366	0.010122	0.0100781	CovTest	Original	New
cg27190967	Prenatal smoking	first	first	0.0123403	0.000341016	0.0411441	0.00190409	-0.00027139	CovTest	Original	New
cg27383335	Prenatal smoking	first	first	0.0096069	0.000492048	0.0485522	0.00051963	0.00213602	CovTest	Original	New
cg27465384	Prenatal smoking	first	first	0.0114868	0.000147865	0.0279736	0.000673068	0.00090873	CovTest	Original	New
cg27538070	Prenatal smoking	first	first	0.0146156	9.80292e-06	0.00831893	-0.00129575	-0.00189632	CovTest	Original	New
cg00379337	Prenatal smoking	first	first	0.0107947	0.000280331	0.0375851	0.00118479	0.00115176	CovTest	Original	New
cg02358165	Prenatal smoking	first	first	0.0109585	0.000200188	0.0322043	0.000163863	6.09672e-05	CovTest	Original	New
cg02376668	Prenatal smoking	first	first	0.00953805	0.000446648	0.0463115	-0.00143912	-0.000572781	CovTest	Original	New
cg02624574	Prenatal smoking	first	first	0.0123378	0.000278633	0.0374683	-8.58714e-05	-0.000129064	CovTest	Original	New
cg03670302	Prenatal smoking	first	first	0.0124642	5.77415e-05	0.0188026	0.00326586	0.0036619	CovTest	Original	New
cg03745555	Prenatal smoking	first	first	0.0117347	0.000301036	0.038794	-0.00124263	0.00116534	CovTest	Original	New
cg03930313	Prenatal smoking	first	first	0.0115557	0.000204064	0.0324691	-0.00119204	-0.00254102	CovTest	Original	New
cg04379055	Prenatal smoking	first	first	0.0137706	3.71936e-05	0.0154621	-0.00544639	-0.00165092	CovTest	Original	New
cg04486417	Prenatal smoking	first	first	0.0111613	0.00024158	0.0350872	0.000306894	8.14156e-05	CovTest	Original	New
cg04858553	Prenatal smoking	first	first	0.0136004	1.50307e-05	0.0101107	-0.000818854	-0.00106831	CovTest	Original	New
cg04972436	Prenatal smoking	first	first	0.0107028	0.000156051	0.0287097	0.00339901	0.00207036	CovTest	Original	New
cg05115106	Prenatal smoking	first	first	0.014005	2.13263e-05	0.0119045	-0.00110999	0.000152344	CovTest	Original	New
cg05145649	Prenatal smoking	first	first	0.0107985	0.000483326	0.0482017	-0.000485275	-0.000160434	CovTest	Original	New
cg05270084	Prenatal smoking	first	first	0.00994407	0.000291937	0.0382408	0.00205178	0.00316759	CovTest	Original	New
cg05512684	Prenatal smoking	first	first	0.0131844	3.92329e-05	0.015745	-0.00290951	-0.00123078	CovTest	Original	New
cg05915375	Prenatal smoking	first	first	0.00977966	0.000382053	0.0432062	0.00280895	0.00346993	CovTest	Original	New
cg05951576	Prenatal smoking	first	first	0.0109931	0.000405655	0.0444878	0.000879285	0.000217976	CovTest	Original	New
cg06190244	Prenatal smoking	first	first	0.0111887	0.000142089	0.0275442	-0.00154126	-0.00144397	CovTest	Original	New
cg06237697	Prenatal smoking	first	first	0.0134081	0.000131882	0.0265609	0.000636267	0.00156904	CovTest	Original	New
cg06244522	Prenatal smoking	second	second	0.0140743	0.000177128	0.0304861	-0.000676832	1.03326e-05	CovTest	Original	New
cg06306927	Prenatal smoking	first	first	0.0140232	4.62771e-05	0.0169668	0.00032825	0.000307982	CovTest	Original	New
cg06809823	Prenatal smoking	first	first	0.0132236	0.000202014	0.0323194	0.00963217	0.0115103	CovTest	Original	New
cg07081569	Prenatal smoking	first	first	0.0121303	0.000134195	0.0267717	-0.000858421	0.000561417	CovTest	Original	New
cg07317616	Prenatal smoking	first	first	0.0106599	0.000336868	0.0410067	-0.00129941	-3.18418e-05	CovTest	Original	New
cg07450393	Prenatal smoking	first	first	0.0151456	3.83528e-05	0.0157071	-0.000328082	0.000288553	CovTest	Original	New
cg08940097	Prenatal smoking	first	first	0.0135935	6.78227e-05	0.0199943	-0.000561509	-0.000326047	CovTest	Original	New
cg09481866	Prenatal smoking	first	first	0.0121654	6.81689e-05	0.020048	0.000514173	0.00132789	CovTest	Original	New
cg09850289	Prenatal smoking	first	first	0.0118382	0.000110411	0.0246622	-0.000875967	-0.00139919	CovTest	Original	New
cg10085305	Prenatal smoking	first	first	0.0124383	0.000348474	0.0415317	0.00214531	0.00251133	CovTest	Original	New
cg10137837	Prenatal smoking	first	first	0.0165874	1.98108e-05	0.0114775	-0.00247228	-0.00428985	CovTest	Original	New
cg10294853	Prenatal smoking	first	first	0.0167951	1.02169e-06	0.00292037	0.00112005	0.00323207	CovTest	Original	New
cg10689404	Prenatal smoking	first	first	0.0128874	8.51087e-05	0.0220531	-0.00153554	-0.00510108	CovTest	Original	New
cg11020315	Prenatal smoking	first	first	0.0110093	0.000360935	0.0422908	6.88104e-05	4.39473e-05	CovTest	Original	New
cg11586239	Prenatal smoking	first	first	0.012398	0.000111884	0.0248149	0.00036482	0.00137006	CovTest	Original	New
cg11979779	Prenatal smoking	first	first	0.015511	7.23312e-06	0.0072046	0.00604232	0.00816464	CovTest	Original	New
cg12894776	Prenatal smoking	first	first	0.0100244	0.000496785	0.0488109	-0.00126448	0.000192058	CovTest	Original	New
cg12996119	Prenatal smoking	first	first	0.0135437	0.000193251	0.0317462	-2.0929e-05	-0.000126226	CovTest	Original	New
cg13757826	Prenatal smoking	first	first	0.0126113	7.93349e-05	0.0213756	8.60548e-05	-0.000132775	CovTest	Original	New
cg13819166	Prenatal smoking	first	first	0.00982267	0.000509733	0.0495583	-0.000180491	-0.00240342	CovTest	Original	New
cg13829089	Prenatal smoking	first	first	0.0129014	0.000101016	0.0237306	-0.00458864	-0.0032173	CovTest	Original	New
cg14090409	Prenatal smoking	first	first	0.0107383	0.000163638	0.0294533	0.00137928	0.00251891	CovTest	Original	New
cg14102880	Prenatal smoking	first	first	0.0126272	6.78353e-05	0.0199943	-0.000289465	-3.79077e-05	CovTest	Original	New
cg14458783	Prenatal smoking	first	first	0.0109033	0.000216514	0.0331912	-0.000397582	-6.10474e-05	CovTest	Original	New
cg14609841	Prenatal smoking	first	first	0.0108086	0.000236388	0.0346673	-0.000352648	0.00019118	CovTest	Original	New
cg14689219	Prenatal smoking	second	second	0.0132695	2.40435e-05	0.0124749	-0.000244821	-2.80449e-05	CovTest	Original	New
cg14697743	Prenatal smoking	first	first	0.0102925	0.000236219	0.0346673	-0.00152877	-0.00561892	CovTest	Original	New
cg14728380	Prenatal smoking	first	first	0.014357	1.72866e-05	0.0109347	-0.00400225	-0.00877005	CovTest	Original	New
cg15437676	Prenatal smoking	first	first	0.00983896	0.000409072	0.0447001	-0.00124602	0.00315134	CovTest	Original	New
cg15462411	Prenatal smoking	first	first	0.0129084	0.000260841	0.0362376	-0.0156598	-0.0137065	CovTest	Original	New
cg15724937	Prenatal smoking	first	first	0.0108963	0.000502149	0.0490512	-0.00141033	-0.00043812	CovTest	Original	New
cg15879426	Prenatal smoking	first	first	0.0167378	2.7425e-06	0.0046722	0.00204583	0.00227696	CovTest	Original	New
cg15880760	Prenatal smoking	first	first	0.0127336	0.000491053	0.0485258	0.00149677	-0.00160096	CovTest	Original	New
cg16563470	Prenatal smoking	first	first	0.0120981	8.83237e-05	0.0223899	-0.000351224	0.00149144	CovTest	Original	New
cg16838980	Prenatal smoking	first	first	0.00990784	0.000316369	0.0396142	-0.00123646	-0.00249117	CovTest	Original	New
cg18374708	Prenatal smoking	second	second	0.0105798	0.000316939	0.039663	0.000312623	0.000204291	CovTest	Original	New
cg18495307	Prenatal smoking	first	first	0.0120768	0.000298329	0.0386298	-0.000686307	-0.000325898	CovTest	Original	New
cg19046826	Prenatal smoking	first	first	0.0115113	0.000336498	0.0409813	0.00058585	-0.000507374	CovTest	Original	New
cg19435859	Prenatal smoking	first	first	0.0103893	0.000420834	0.0452819	-0.000409735	-0.000430441	CovTest	Original	New
cg20239160	Prenatal smoking	first	first	0.00987358	0.000388789	0.0436317	-0.00105375	0.000566282	CovTest	Original	New
cg20355657	Prenatal smoking	first	first	0.0125903	6.09894e-05	0.0192865	0.00503057	0.00739624	CovTest	Original	New
cg20439633	Prenatal smoking	second	second	0.0169125	1.51907e-05	0.010133	0.000274403	0.000384211	CovTest	Original	New
cg20591728	Prenatal smoking	first	first	0.0107768	0.00028548	0.0379024	0.000421272	0.000833072	CovTest	Original	New
cg20752005	Prenatal smoking	first	first	0.0118174	7.06506e-05	0.0202503	-0.000689722	-0.000191157	CovTest	Original	New
cg20806493	Prenatal smoking	first	first	0.0131978	3.98457e-05	0.0158855	-2.7623e-05	-0.000753796	CovTest	Original	New
cg21549415	Prenatal smoking	first	first	0.0144635	2.49971e-05	0.012767	0.000964268	0.000759542	CovTest	Original	New
cg21692194	Prenatal smoking	first	first	0.0108385	0.000421232	0.0452819	-0.0038068	-0.00374705	CovTest	Original	New
cg22346355	Prenatal smoking	first	first	0.0193352	3.30759e-07	0.0018882	0.000462777	0.000182995	CovTest	Original	New
cg23244169	Prenatal smoking	first	first	0.0120506	0.000259337	0.0361096	-0.00164089	-0.00511934	CovTest	Original	New
cg23496516	Prenatal smoking	first	first	0.0114419	0.000172606	0.0301024	-0.00140918	1.41416e-05	CovTest	Original	New
cg24136318	Prenatal smoking	first	first	0.0116296	0.000118016	0.0253916	-0.00778993	-0.0105666	CovTest	Original	New
cg24535234	Prenatal smoking	first	first	0.010079	0.000252466	0.0357522	0.000256066	-5.87841e-06	CovTest	Original	New
cg25384247	Prenatal smoking	first	first	0.00966308	0.00049126	0.0485261	0.000311454	6.8481e-05	CovTest	Original	New
cg25613227	Prenatal smoking	first	first	0.0120968	0.000287055	0.0379689	0.000324567	0.000908166	CovTest	Original	New
cg25649200	Prenatal smoking	first	first	0.0107772	0.000359118	0.0421611	0.000680585	0.000813019	CovTest	Original	New
cg26257145	Prenatal smoking	first	first	0.0124229	0.000189524	0.0314899	0.00139511	0.0014046	CovTest	Original	New
cg26400341	Prenatal smoking	first	first	0.0105372	0.000477744	0.047869	-0.00258935	0.0012767	CovTest	Original	New
cg26416159	Prenatal smoking	first	first	0.0103712	0.00028876	0.0380853	-0.000697101	0.000861126	CovTest	Original	New
cg27144709	Prenatal smoking	first	first	0.0135913	2.50841e-05	0.0127803	0.00357604	0.00315387	CovTest	Original	New
cg02962521	Prenatal smoking	first	first	0.0154798	5.15654e-06	0.00628865	0.000777757	0.00098754	CovTest	Original	New
cg03014326	Prenatal smoking	first	first	0.0122906	0.000126969	0.0261611	-0.00201192	-0.000943174	CovTest	Original	New
cg03405114	Prenatal smoking	first	first	0.0138621	0.000120089	0.0255164	-0.00132007	-0.000623749	CovTest	Original	New
cg05678191	Prenatal smoking	first	first	0.0118726	0.000160926	0.0291919	0.000417963	-1.46328e-05	CovTest	Original	New
cg06360427	Prenatal smoking	first	first	0.0112584	0.000415907	0.0450888	0.00247504	0.000153288	CovTest	Original	New
cg07740306	Prenatal smoking	first	first	0.0138258	1.45445e-05	0.00999795	0.00804645	0.0104635	CovTest	Original	New
cg07935012	Prenatal smoking	first	first	0.0149472	1.75079e-05	0.0109801	-0.00173692	-0.00388992	CovTest	Original	New
cg11749010	Prenatal smoking	first	first	0.0131923	5.87556e-05	0.0189506	-0.00521119	-0.00492332	CovTest	Original	New
cg11891983	Prenatal smoking	first	first	0.0158516	9.74826e-06	0.00831732	-0.000210099	0.00149569	CovTest	Original	New
cg13471184	Prenatal smoking	first	first	0.0122321	0.000149823	0.0281381	-0.0012928	-0.000487689	CovTest	Original	New
cg15846488	Prenatal smoking	first	first	0.0102855	0.000211378	0.0328953	6.15717e-05	0.00161118	CovTest	Original	New
cg16141316	Prenatal smoking	first	first	0.0122641	0.000110918	0.0247171	-3.9777e-05	0.00026353	CovTest	Original	New
cg21444002	Prenatal smoking	first	first	0.0125263	0.000202655	0.0323731	-0.000610497	-0.000762554	CovTest	Original	New
cg23754772	Prenatal smoking	first	first	0.0100906	0.00024798	0.0354349	-0.00152629	-0.00169281	CovTest	Original	New
cg24513433	Prenatal smoking	first	first	0.013715	2.8127e-05	0.0133708	0.000248784	9.21438e-05	CovTest	Original	New
cg26552784	Prenatal smoking	first	first	0.0130745	0.000203192	0.0324236	0.000139522	5.63454e-05	CovTest	Original	New
cg01501819	Prenatal smoking	first	first	0.0114227	0.000258178	0.0360451	-0.00205226	-0.00176656	CovTest	Original	New
cg01985054	Prenatal smoking	first	first	0.0132412	4.90223e-05	0.0175344	0.000699445	0.00104468	CovTest	Original	New
cg02128655	Prenatal smoking	second	second	0.0116417	0.000132603	0.0266298	-0.000148309	-0.000189342	CovTest	Original	New
cg02397525	Prenatal smoking	first	first	0.0116808	0.000142241	0.0275442	-0.000419142	-0.000255266	CovTest	Original	New
cg03031726	Prenatal smoking	first	first	0.0156717	6.11442e-06	0.00668619	-0.000121652	-0.000308439	CovTest	Original	New
cg03063453	Prenatal smoking	first	first	0.0151443	4.65215e-05	0.0170111	0.000412748	-0.000385284	CovTest	Original	New
cg03344031	Prenatal smoking	first	first	0.0138231	1.1788e-05	0.00911696	-0.00579452	-0.00677017	CovTest	Original	New
cg03562044	Prenatal smoking	first	first	0.0132683	0.000320557	0.0398644	-9.91614e-05	-0.000205039	CovTest	Original	New
cg04150574	Prenatal smoking	second	second	0.0130138	0.00033892	0.0410825	6.76714e-06	2.87982e-07	CovTest	Original	New
cg04685743	Prenatal smoking	first	first	0.015536	1.80302e-05	0.0111488	-0.00213968	-0.00172364	CovTest	Original	New
cg05020604	Prenatal smoking	first	first	0.0150325	2.6283e-05	0.0129433	-0.000702348	-0.000437774	CovTest	Original	New
cg06397322	Prenatal smoking	first	first	0.0160478	2.85883e-06	0.00469041	0.0117114	0.00903291	CovTest	Original	New
cg06732516	Prenatal smoking	first	first	0.0114907	0.000284781	0.0378744	-0.0108142	-0.00913944	CovTest	Original	New
cg06736160	Prenatal smoking	first	first	0.0108301	0.000174225	0.0302349	0.000159728	-0.000252224	CovTest	Original	New
cg07987262	Prenatal smoking	first	first	0.0124664	0.000293076	0.038333	-0.000968128	-0.000369047	CovTest	Original	New
cg09429435	Prenatal smoking	first	first	0.0120899	5.0988e-05	0.0177982	0.00936883	0.0119838	CovTest	Original	New
cg09443652	Prenatal smoking	second	second	0.0240666	3.05767e-07	0.00184406	-0.00048415	1.16974e-06	CovTest	Original	New
cg09926389	Prenatal smoking	first	first	0.0166973	2.46388e-06	0.00437503	0.000538413	0.000247997	CovTest	Original	New
cg10265570	Prenatal smoking	first	first	0.0122286	0.000252912	0.0357538	-0.000875882	-0.000440709	CovTest	Original	New
cg10661629	Prenatal smoking	first	first	0.0113179	0.000195989	0.0319288	0.00015771	0.000376642	CovTest	Original	New
cg10721001	Prenatal smoking	first	first	0.0143547	0.000143594	0.0276303	-0.000803265	-0.000337227	CovTest	Original	New
cg11225056	Prenatal smoking	first	first	0.0114779	0.000417208	0.0450976	0.00109848	0.00107511	CovTest	Original	New
cg11416076	Prenatal smoking	first	first	0.015118	2.55036e-05	0.0128175	0.00091438	0.000470655	CovTest	Original	New
cg11634930	Prenatal smoking	first	first	0.0106878	0.000281113	0.0376405	8.50234e-05	0.000301966	CovTest	Original	New
cg11660879	Prenatal smoking	first	first	0.015057	4.30571e-05	0.0165098	-0.000763995	-7.00963e-05	CovTest	Original	New
cg11849132	Prenatal smoking	first	first	0.0104294	0.000245998	0.0353287	0.0018397	0.00387654	CovTest	Original	New
cg12154045	Prenatal smoking	second	second	0.0117125	0.000282884	0.0377285	-0.000988211	-0.00289615	CovTest	Original	New
cg12937807	Prenatal smoking	first	first	0.0156847	2.68879e-05	0.0130853	-0.000932826	-0.000206929	CovTest	Original	New
cg12961842	Prenatal smoking	first	first	0.0121402	0.000129274	0.0262881	-0.00137542	-0.00135174	CovTest	Original	New
cg12978028	Prenatal smoking	first	first	0.0108822	0.000490932	0.0485258	0.00500516	0.00566479	CovTest	Original	New
cg13461241	Prenatal smoking	first	first	0.00989978	0.000465531	0.0473102	-0.00185569	-0.00190621	CovTest	Original	New
cg13487726	Prenatal smoking	first	first	0.0119202	7.1926e-05	0.020441	2.29882e-05	0.000218199	CovTest	Original	New
cg13668618	Prenatal smoking	first	first	0.0137096	0.000118264	0.0253916	-0.000446872	-0.000925683	CovTest	Original	New
cg13671109	Prenatal smoking	first	first	0.0116856	0.000401262	0.0443621	0.000713977	0.000662627	CovTest	Original	New
cg15001636	Prenatal smoking	first	first	0.0139705	9.05784e-05	0.0225272	0.00239212	0.00821205	CovTest	Original	New
cg15027907	Prenatal smoking	first	first	0.0100124	0.000258253	0.0360451	-0.0166165	-0.0127723	CovTest	Original	New
cg15424739	Prenatal smoking	first	first	0.0148059	2.27979e-05	0.0121219	0.000400026	0.000248498	CovTest	Original	New
cg15719255	Prenatal smoking	first	first	0.0212954	4.58346e-07	0.00219337	-0.00326272	-0.00159213	CovTest	Original	New
cg16570746	Prenatal smoking	first	first	0.0113371	0.000101119	0.0237306	-0.00116467	-0.00278681	CovTest	Original	New
cg18117297	Prenatal smoking	first	first	0.0103335	0.000254902	0.0358202	-0.000311847	-0.000112151	CovTest	Original	New
cg18505103	Prenatal smoking	first	first	0.0105967	0.000449088	0.0463682	-0.000289961	-0.000201052	CovTest	Original	New
cg18709349	Prenatal smoking	first	first	0.0106663	0.00033078	0.0406113	-0.00024902	2.09354e-05	CovTest	Original	New
cg19263877	Prenatal smoking	first	first	0.0106916	0.000321526	0.0399194	-0.000826662	-6.54201e-05	CovTest	Original	New
cg19708659	Prenatal smoking	first	first	0.0162003	1.89491e-06	0.0037225	-0.00514009	-0.00757017	CovTest	Original	New
cg20225246	Prenatal smoking	first	first	0.0121595	0.000269814	0.0369287	-0.00135328	-0.00178901	CovTest	Original	New
cg22652849	Prenatal smoking	first	first	0.00964184	0.000488367	0.0484032	-0.0026146	-0.000703522	CovTest	Original	New
cg22857947	Prenatal smoking	first	first	0.0147526	2.5983e-05	0.0128833	0.00252315	0.00306635	CovTest	Original	New
cg23061046	Prenatal smoking	first	first	0.0121811	0.000129863	0.0263349	0.00200698	-0.00161219	CovTest	Original	New
cg24074448	Prenatal smoking	first	first	0.0109073	0.000417098	0.0450976	-0.00767257	-0.0112442	CovTest	Original	New
cg24117473	Prenatal smoking	first	first	0.0125947	7.47649e-05	0.0207671	0.000805919	0.000986484	CovTest	Original	New
cg24299136	Prenatal smoking	first	first	0.0150718	1.02812e-05	0.00848284	-0.000491484	-0.000560062	CovTest	Original	New
cg24415208	Prenatal smoking	first	first	0.0137316	1.61576e-05	0.0105074	-0.00382989	-0.00468405	CovTest	Original	New
cg25466989	Prenatal smoking	first	first	0.0102444	0.000430608	0.0455885	0.00152902	0.000156602	CovTest	Original	New
cg25586175	Prenatal smoking	first	first	0.0124725	0.000285922	0.0379041	-0.000301728	0.00202625	CovTest	Original	New
cg25623174	Prenatal smoking	first	first	0.0135317	2.27299e-05	0.0121208	-0.00130145	-0.00178757	CovTest	Original	New
cg25633284	Prenatal smoking	first	first	0.00921965	0.00051695	0.0498583	-0.000569673	-0.000332316	CovTest	Original	New
cg26505371	Prenatal smoking	first	first	0.0116085	0.000423169	0.045338	-0.000121243	0.000106147	CovTest	Original	New
cg26908755	Prenatal smoking	first	first	0.0140706	2.37621e-05	0.0123951	-0.000153276	-1.78863e-05	CovTest	Original	New
cg27109890	Prenatal smoking	first	first	0.0110769	0.000401579	0.0443659	0.00668973	0.00985891	CovTest	Original	New
cg27181142	Prenatal smoking	first	first	0.0115184	0.000417717	0.0450985	0.0020498	0.00525305	CovTest	Original	New
cg27275352	Prenatal smoking	first	first	0.0142074	2.2249e-05	0.012004	0.000212256	0.000422349	CovTest	Original	New
cg01157780	Prenatal smoking	first	first	0.0148887	7.87287e-06	0.00750235	-0.00255568	-0.0024184	CovTest	Original	New
cg01847620	Prenatal smoking	first	first	0.0134793	8.47532e-05	0.0220531	0.000119943	0.000106073	CovTest	Original	New
cg02802871	Prenatal smoking	first	first	0.0139576	7.08609e-05	0.0202841	-0.000167749	-0.000377732	CovTest	Original	New
cg04772948	Prenatal smoking	first	first	0.0119529	0.000113901	0.0249978	-0.00109263	0.000210107	CovTest	Original	New
cg05117058	Prenatal smoking	first	first	0.0107666	0.000401444	0.0443621	0.000107479	0.000271462	CovTest	Original	New
cg07064544	Prenatal smoking	first	first	0.0128871	0.000133075	0.0266447	0.000550119	0.000316826	CovTest	Original	New
cg07782925	Prenatal smoking	first	first	0.01694	6.07882e-05	0.0192765	7.82775e-05	-0.000192319	CovTest	Original	New
cg07917176	Prenatal smoking	first	first	0.0130999	2.67561e-05	0.0130739	-0.000634814	-7.19543e-05	CovTest	Original	New
cg08597733	Prenatal smoking	first	first	0.013229	0.000106234	0.0243596	-0.000417902	9.8099e-05	CovTest	Original	New
cg09663133	Prenatal smoking	first	first	0.0143935	6.39734e-05	0.0196407	0.00297649	0.00286267	CovTest	Original	New
cg12419685	Prenatal smoking	first	first	0.0149408	4.19387e-05	0.0162943	0.00380773	0.00485744	CovTest	Original	New
cg15571277	Prenatal smoking	first	first	0.0119432	0.000188539	0.0314058	0.00012863	0.00044502	CovTest	Original	New
cg15782228	Prenatal smoking	accumulation	accumulation	0.0116824	0.000123736	0.0258807	NA	NA	CovTest	Original	New
cg22258358	Prenatal smoking	second	second	0.0234114	1.07224e-08	0.00040984	0.00261486	0.00221122	CovTest	Original	New
cg22474464	Prenatal smoking	first	first	0.0162748	9.64046e-06	0.00824132	-0.000983111	-0.000387058	CovTest	Original	New
cg24272002	Prenatal smoking	first	first	0.00979733	0.000312086	0.0393916	-0.00514277	-0.000217249	CovTest	Original	New
cg24348495	Prenatal smoking	accumulation	accumulation	0.0215192	1.58464e-07	0.00131632	NA	NA	CovTest	Original	New
cg25218716	Prenatal smoking	first	first	0.0117904	0.000288373	0.038057	0.000458293	-4.45845e-05	CovTest	Original	New
cg25488669	Prenatal smoking	first	first	0.0154383	2.25113e-05	0.0120519	-0.000270311	-0.000252573	CovTest	Original	New
cg27459437	Prenatal smoking	first	first	0.0113034	0.000193627	0.0317607	0.00132345	0.000602714	CovTest	Original	New
cg03419014	Prenatal smoking	first	first	0.0137054	6.52112e-05	0.0197725	0.0017268	0.00341344	CovTest	Original	New
cg07047280	Prenatal smoking	first	first	0.0114306	0.000100249	0.0236144	0.00348763	0.00382447	CovTest	Original	New
cg10057853	Prenatal smoking	first	first	0.0116146	0.000278004	0.0374644	-0.000584942	-0.000496461	CovTest	Original	New
cg12612445	Prenatal smoking	first	first	0.00967302	0.000426149	0.0454481	-0.00554591	-0.000746882	CovTest	Original	New
cg14381945	Prenatal smoking	first	first	0.0104213	0.000216327	0.0331912	0.00199756	0.0034796	CovTest	Original	New
cg21930140	Prenatal smoking	first	first	0.012667	9.5282e-05	0.0230487	-0.000946627	-0.00256108	CovTest	Original	New
cg22991039	Prenatal smoking	first	first	0.00951553	0.000357853	0.0420952	0.00386434	0.0039179	CovTest	Original	New
cg25531249	Prenatal smoking	first	first	0.0107291	0.000445707	0.0462839	-0.000587632	-0.000136704	CovTest	Original	New
cg26108594	Prenatal smoking	first	first	0.011349	0.000375291	0.0428825	-0.00531783	-0.00503283	CovTest	Original	New
cg01033463	Prenatal smoking	first	first	0.0141024	3.8736e-05	0.015745	-0.000250665	-4.47885e-05	CovTest	Original	New
cg01885783	Prenatal smoking	second	second	0.0121649	4.27984e-05	0.0164454	0.00238927	0.00336628	CovTest	Original	New
cg06822952	Prenatal smoking	second	second	0.0138519	6.79196e-05	0.0199943	2.55237e-05	-5.69046e-05	CovTest	Original	New
cg07493876	Prenatal smoking	first	first	0.0157627	1.64586e-05	0.0106716	0.000104886	0.000151305	CovTest	Original	New
cg09501146	Prenatal smoking	first	first	0.0148411	1.09992e-05	0.00876098	0.000864362	-0.00150868	CovTest	Original	New
cg09877744	Prenatal smoking	first	first	0.00993514	0.00030851	0.0391876	-0.00446783	-0.00518059	CovTest	Original	New
cg10474712	Prenatal smoking	first	first	0.0112134	0.000321984	0.0399537	-0.00114709	-0.000537214	CovTest	Original	New
cg13168407	Prenatal smoking	first	first	0.0130852	0.000123805	0.0258807	-1.73919e-05	-0.000179025	CovTest	Original	New
cg13390444	Prenatal smoking	first	first	0.0129463	2.74281e-05	0.0132406	-0.000736256	-0.00101599	CovTest	Original	New
cg14186256	Prenatal smoking	first	first	0.0113417	0.000228112	0.0340426	5.7697e-05	-0.000156964	CovTest	Original	New
cg15377988	Prenatal smoking	first	first	0.0126953	0.000245103	0.0352526	-6.13929e-05	0.000626845	CovTest	Original	New
cg17588491	Prenatal smoking	first	first	0.0119007	0.000410267	0.0447419	-0.00196902	-0.00386278	CovTest	Original	New
cg18641946	Prenatal smoking	first	first	0.0125787	0.000306532	0.0390878	0.00206174	0.000475775	CovTest	Original	New
cg18697982	Prenatal smoking	first	first	0.0116963	9.35155e-05	0.0228346	4.04577e-05	-0.000142983	CovTest	Original	New
cg19085118	Prenatal smoking	first	first	0.0193404	1.031e-06	0.00292037	-0.00054808	-0.00114405	CovTest	Original	New
cg23236325	Prenatal smoking	first	first	0.0116791	0.000128204	0.0262036	7.34416e-05	0.000439441	CovTest	Original	New
cg27045447	Prenatal smoking	first	first	0.0113527	0.000108064	0.0244366	0.000966821	0.000212261	CovTest	Original	New
cg27387888	Prenatal smoking	first	first	0.015099	2.68984e-05	0.0130853	0.000150496	0.00035308	CovTest	Original	New
cg03519711	Prenatal smoking	first	first	0.0119157	0.000392718	0.0438713	-0.000365407	-5.55931e-05	CovTest	Original	New
cg04013419	Prenatal smoking	accumulation	accumulation	0.0179816	1.65007e-06	0.00358384	NA	NA	CovTest	Original	New
cg05124614	Prenatal smoking	first	first	0.0116664	0.000117795	0.0253916	0.00219921	0.00353193	CovTest	Original	New
cg05371688	Prenatal smoking	first	first	0.0124722	6.89336e-05	0.0201383	-0.00219762	-0.00139695	CovTest	Original	New
cg05436231	Prenatal smoking	first	first	0.0161423	1.96755e-05	0.0114775	-0.000741367	-0.00270491	CovTest	Original	New
cg05820107	Prenatal smoking	second	second	0.0122927	6.941e-05	0.0201981	0.00122074	0.000887061	CovTest	Original	New
cg06662140	Prenatal smoking	second	second	0.0103176	0.000405343	0.0444878	0.0119627	0.0128781	CovTest	Original	New
cg06875179	Prenatal smoking	first	first	0.0110848	0.000133244	0.0266644	-0.00315819	-0.0017369	CovTest	Original	New
cg07536847	Prenatal smoking	first	first	0.0134681	6.93567e-05	0.0201981	4.95326e-05	-0.000628251	CovTest	Original	New
cg08853451	Prenatal smoking	first	first	0.0119269	0.000217857	0.0332766	-0.00279601	-0.0005491	CovTest	Original	New
cg09123484	Prenatal smoking	first	first	0.0101278	0.00036858	0.0426083	-0.000226229	-0.000211046	CovTest	Original	New
cg10435967	Prenatal smoking	first	first	0.0128279	0.000150026	0.0281544	0.00184513	0.00347996	CovTest	Original	New
cg11207852	Prenatal smoking	first	first	0.012468	0.000165802	0.029517	-0.000797827	-0.000617923	CovTest	Original	New
cg11680055	Prenatal smoking	second	second	0.0150058	5.78525e-05	0.0188248	-0.00777414	-0.00754256	CovTest	Original	New
cg12441919	Prenatal smoking	first	first	0.0136954	0.000112848	0.024857	-0.00242554	-0.000750817	CovTest	Original	New
cg12601945	Prenatal smoking	first	first	0.0161765	4.04695e-06	0.00569363	-0.00215583	-0.00146265	CovTest	Original	New
cg13685833	Prenatal smoking	first	first	0.0123083	7.07733e-05	0.0202723	9.00605e-05	-9.11728e-05	CovTest	Original	New
cg14992232	Prenatal smoking	first	first	0.0146038	3.76852e-05	0.0155431	-0.00106376	-0.000646603	CovTest	Original	New
cg15120454	Prenatal smoking	first	first	0.012597	0.00012088	0.025598	0.00169644	0.000361055	CovTest	Original	New
cg16252727	Prenatal smoking	first	first	0.011217	0.000508371	0.0494726	-0.00104612	0.000422378	CovTest	Original	New
cg16321293	Prenatal smoking	first	first	0.0109255	0.000221235	0.0335628	0.00144523	0.00152028	CovTest	Original	New
cg16378352	Prenatal smoking	first	first	0.0136329	5.71356e-05	0.0187579	-0.00114846	-0.00208563	CovTest	Original	New
cg16648140	Prenatal smoking	first	first	0.00995095	0.000353428	0.0417891	-0.00155556	0.000970019	CovTest	Original	New
cg17154605	Prenatal smoking	first	first	0.0104595	0.000378516	0.0429817	-0.00184948	-0.00100607	CovTest	Original	New
cg17201124	Prenatal smoking	first	first	0.0110795	0.000149034	0.028096	0.00112534	-0.000872722	CovTest	Original	New
cg17755964	Prenatal smoking	second	second	0.0103545	0.000413869	0.0449787	-3.09683e-05	-0.000163749	CovTest	Original	New
cg18021690	Prenatal smoking	second	second	0.0098418	0.000373452	0.0428722	0.000379256	0.000248842	CovTest	Original	New
cg18153326	Prenatal smoking	first	first	0.0114719	0.000154749	0.0285549	-4.36726e-05	-0.001283	CovTest	Original	New
cg19375880	Prenatal smoking	first	first	0.0121554	8.51263e-05	0.0220531	-0.00257613	-0.000872034	CovTest	Original	New
cg19406511	Prenatal smoking	first	first	0.0116825	9.8537e-05	0.0233773	-0.000669299	-0.000473195	CovTest	Original	New
cg20139898	Prenatal smoking	recency	recency	0.013101	7.41635e-05	0.0207208	NA	NA	CovTest	Original	New
cg20803293	Prenatal smoking	second	second	0.0133401	0.000233923	0.0345468	-0.00877294	-0.00456717	CovTest	Original	New
cg20951194	Prenatal smoking	first	first	0.0103945	0.000196757	0.0319509	-0.00338549	-0.0020238	CovTest	Original	New
cg23108922	Prenatal smoking	first	first	0.0113667	0.000341643	0.0411675	0.000860834	0.000141465	CovTest	Original	New
cg23620340	Prenatal smoking	first	first	0.0118096	0.000393448	0.0439194	-0.00158944	-0.00093719	CovTest	Original	New
cg23801338	Prenatal smoking	accumulation	accumulation	0.0128631	0.000345821	0.0413162	NA	NA	CovTest	Original	New
cg23842796	Prenatal smoking	first	first	0.0103079	0.000287871	0.038025	0.000406407	0.000145918	CovTest	Original	New
cg24083324	Prenatal smoking	first	first	0.0101046	0.000509837	0.0495583	0.00358273	0.00170951	CovTest	Original	New
cg24579224	Prenatal smoking	first	first	0.0114908	0.00025142	0.0356671	-1.63545e-05	0.000526154	CovTest	Original	New
cg26421310	Prenatal smoking	first	first	0.00940129	0.000444596	0.046256	0.000180322	-0.000126442	CovTest	Original	New
cg27169129	Prenatal smoking	first	first	0.01349	3.19421e-05	0.0143497	-0.00077574	-0.000721833	CovTest	Original	New
cg27573593	Prenatal smoking	first	first	0.011613	0.000151779	0.0283127	0.00397263	0.00439302	CovTest	Original	New
cg01696784	Prenatal smoking	first	first	0.0174346	1.39706e-06	0.00347496	0.00321298	0.0022256	CovTest	Original	New
cg03562266	Prenatal smoking	first	first	0.0148498	7.41927e-06	0.00734664	-0.00141967	-0.000703792	CovTest	Original	New
cg03979229	Prenatal smoking	first	first	0.0128572	0.000115531	0.0252007	0.00325644	0.00712769	CovTest	Original	New
cg04306050	Prenatal smoking	first	first	0.0110471	0.000377504	0.0429676	0.000110745	-5.04088e-05	CovTest	Original	New
cg04723343	Prenatal smoking	first	first	0.0160865	5.2394e-06	0.00632507	0.000369743	3.42786e-05	CovTest	Original	New
cg04944682	Prenatal smoking	second	second	0.0119754	8.24535e-05	0.0218285	0.00856895	0.0107323	CovTest	Original	New
cg05208381	Prenatal smoking	first	first	0.0124219	0.000339842	0.0411182	-0.000529852	-0.00195235	CovTest	Original	New
cg05691168	Prenatal smoking	first	first	0.0190034	1.89352e-07	0.00151411	-0.000757299	-0.000561642	CovTest	Original	New
cg07780694	Prenatal smoking	first	first	0.0130369	0.000146719	0.0279024	0.00276928	0.00196621	CovTest	Original	New
cg12424785	Prenatal smoking	first	first	0.0136632	2.20482e-05	0.012	-0.00122903	-0.00435237	CovTest	Original	New
cg12573791	Prenatal smoking	first	first	0.0153675	4.7594e-05	0.0172316	-0.00252295	-0.000162842	CovTest	Original	New
cg13659026	Prenatal smoking	first	first	0.0121945	0.000243058	0.0351306	-0.000233891	-0.000214335	CovTest	Original	New
cg14453187	Prenatal smoking	first	first	0.0174304	1.63332e-06	0.00358384	-0.00189062	-0.003537	CovTest	Original	New
cg16073378	Prenatal smoking	first	first	0.0110406	0.000328281	0.0404162	-0.00110666	-0.00105353	CovTest	Original	New
cg16116632	Prenatal smoking	first	first	0.0125736	0.000104119	0.0241094	-5.35016e-05	0.00262889	CovTest	Original	New
cg16329650	Prenatal smoking	second	second	0.0110791	0.000273522	0.0372126	0.00122051	0.000259106	CovTest	Original	New
cg16433632	Prenatal smoking	first	first	0.0128473	8.71568e-05	0.0222093	0.00336598	0.00973119	CovTest	Original	New
cg17125141	Prenatal smoking	first	first	0.0153077	1.73989e-05	0.0109585	0.000401184	0.00163578	CovTest	Original	New
cg18404308	Prenatal smoking	first	first	0.0162684	2.78046e-06	0.0046722	-0.000713859	-0.000602472	CovTest	Original	New
cg18429434	Prenatal smoking	first	first	0.010817	0.000216748	0.0331912	-0.000708741	-0.000236344	CovTest	Original	New
cg18436491	Prenatal smoking	first	first	0.0109743	0.000175279	0.030333	-0.00371982	-0.00260084	CovTest	Original	New
cg18863077	Prenatal smoking	first	first	0.0133816	0.000333362	0.0407636	-0.000497019	-0.000206873	CovTest	Original	New
cg19075225	Prenatal smoking	first	first	0.0160306	1.25283e-05	0.00934328	0.000395425	0.00323735	CovTest	Original	New
cg19216563	Prenatal smoking	first	first	0.0108235	0.000261971	0.0362927	-0.000311208	-0.000183912	CovTest	Original	New
cg20025003	Prenatal smoking	first	first	0.0122269	0.000119	0.0254401	-0.000680389	-0.000176012	CovTest	Original	New
cg20994660	Prenatal smoking	first	first	0.0159795	6.785e-06	0.00702858	0.00520536	0.00285971	CovTest	Original	New
cg21712322	Prenatal smoking	first	first	0.0130819	4.38746e-05	0.0166386	0.00192824	0.000245959	CovTest	Original	New
cg21901277	Prenatal smoking	first	first	0.0170542	2.76488e-06	0.0046722	0.00225609	0.00279773	CovTest	Original	New
cg22158769	Prenatal smoking	first	first	0.0151637	1.98074e-05	0.0114775	0.00014745	-0.000186448	CovTest	Original	New
cg22939193	Prenatal smoking	first	first	0.0102456	0.000218352	0.0333325	0.000738023	0.000306137	CovTest	Original	New
cg22973789	Prenatal smoking	first	first	0.0119883	0.000401886	0.0443775	-9.18631e-06	9.62076e-05	CovTest	Original	New
cg23460843	Prenatal smoking	first	first	0.013011	0.000149117	0.028096	-0.000314331	-0.000394541	CovTest	Original	New
cg23547017	Prenatal smoking	first	first	0.0108222	0.000183862	0.0309869	0.000478338	0.000215442	CovTest	Original	New
cg24068299	Prenatal smoking	first	first	0.0135514	2.03196e-05	0.0116331	-0.00106158	-0.000742877	CovTest	Original	New
cg25912580	Prenatal smoking	first	first	0.0127917	0.000120001	0.02551	-0.00264391	-0.00136858	CovTest	Original	New
cg26095658	Prenatal smoking	first	first	0.0151863	2.12008e-05	0.0118751	-0.00119396	-0.00229642	CovTest	Original	New
cg26149275	Prenatal smoking	first	first	0.011011	0.000153545	0.0284545	0.000835858	0.000470632	CovTest	Original	New
cg26360792	Prenatal smoking	first	first	0.0140274	2.6099e-05	0.0128833	-0.00143518	-0.000701012	CovTest	Original	New
cg02573703	Prenatal smoking	first	first	0.0115092	9.63099e-05	0.023137	0.0014269	-0.00247968	CovTest	Original	New
cg03363248	Prenatal smoking	first	first	0.0161025	1.14639e-05	0.00896455	0.00177033	0.000423725	CovTest	Original	New
cg04535829	Prenatal smoking	first	first	0.0112823	0.00013757	0.0270505	0.000872216	0.000673508	CovTest	Original	New
cg05531255	Prenatal smoking	first	first	0.0159662	7.65333e-06	0.00748652	0.000252839	-0.000116516	CovTest	Original	New
cg07398614	Prenatal smoking	second	second	0.010366	0.000369325	0.0426318	0.000520921	0.000130002	CovTest	Original	New
cg12378187	Prenatal smoking	first	first	0.0119569	0.00020285	0.0323922	0.000946386	-0.00239627	CovTest	Original	New
cg12396054	Prenatal smoking	second	second	0.0171474	9.91514e-07	0.00288938	-0.000167919	-0.000154125	CovTest	Original	New
cg14767442	Prenatal smoking	first	first	0.0118501	0.000116017	0.025211	-0.00224769	-0.00214848	CovTest	Original	New
cg15029402	Prenatal smoking	first	first	0.00989666	0.000296183	0.0385217	0.00244096	0.00254259	CovTest	Original	New
cg15736553	Prenatal smoking	first	first	0.012265	0.000258303	0.0360451	-0.000867654	0.000232787	CovTest	Original	New
cg19859486	Prenatal smoking	second	second	0.0130084	6.19806e-05	0.0194189	0.00027112	-1.11685e-05	CovTest	Original	New
cg20106776	Prenatal smoking	first	first	0.0131055	2.72862e-05	0.013222	5.47395e-05	-0.00271596	CovTest	Original	New
cg20894727	Prenatal smoking	first	first	0.0150177	1.2369e-05	0.00929274	-0.000620075	-0.000237831	CovTest	Original	New
cg20918563	Prenatal smoking	first	first	0.0139657	0.000129213	0.0262879	-0.0010372	0.00010564	CovTest	Original	New
cg23085666	Prenatal smoking	first	first	0.0123604	6.05815e-05	0.019259	0.00171803	0.00171108	CovTest	Original	New
cg23485473	Prenatal smoking	first	first	0.0118179	0.00032427	0.0401581	-0.00340361	-0.00265868	CovTest	Original	New
cg23825335	Prenatal smoking	first	first	0.0109144	0.000173868	0.0302317	-0.00221193	-0.00178043	CovTest	Original	New
cg24636867	Prenatal smoking	first	first	0.0155616	5.64321e-05	0.018679	6.4797e-05	-0.00025641	CovTest	Original	New
cg26113636	Prenatal smoking	first	first	0.0125334	7.41772e-05	0.0207208	-0.000102522	-8.30512e-05	CovTest	Original	New
cg01122241	Prenatal smoking	first	first	0.0124672	3.89975e-05	0.015745	-0.00316048	-0.00494118	CovTest	Original	New
cg02716173	Prenatal smoking	first	first	0.010529	0.00036227	0.0423095	0.000152571	9.53439e-05	CovTest	Original	New
cg04298196	Prenatal smoking	first	first	0.0105255	0.000424362	0.0453569	-0.000477617	-0.00028994	CovTest	Original	New
cg05139709	Prenatal smoking	first	first	0.0115271	0.00015016	0.0281596	-0.00129519	-0.000203565	CovTest	Original	New
cg05619888	Prenatal smoking	first	first	0.0129051	6.47476e-05	0.0197352	7.06629e-05	-5.46287e-05	CovTest	Original	New
cg06256858	Prenatal smoking	first	first	0.0106483	0.000250105	0.0355448	-0.000994919	-0.00116745	CovTest	Original	New
cg07695835	Prenatal smoking	first	first	0.0105201	0.000286492	0.0379339	0.00329708	0.0012723	CovTest	Original	New
cg09329496	Prenatal smoking	first	first	0.0142124	8.92282e-06	0.0079028	-0.000230664	-0.000145043	CovTest	Original	New
cg09986292	Prenatal smoking	first	first	0.0123286	0.000130596	0.0264469	-0.000544527	-0.000512146	CovTest	Original	New
cg10410142	Prenatal smoking	first	first	0.0116112	0.000191482	0.0316327	0.000977577	0.000747514	CovTest	Original	New
cg10728756	Prenatal smoking	first	first	0.0118049	6.5407e-05	0.019777	-0.00160457	-0.000576684	CovTest	Original	New
cg12537382	Prenatal smoking	first	first	0.0132747	8.03578e-05	0.0214625	0.000399564	8.30749e-05	CovTest	Original	New
cg17035899	Prenatal smoking	accumulation	accumulation	0.0137195	0.000102993	0.0239794	NA	NA	CovTest	Original	New
cg17244462	Prenatal smoking	first	first	0.0104141	0.000370846	0.0427067	0.000267052	-0.000106261	CovTest	Original	New
cg17891759	Prenatal smoking	first	first	0.0159865	7.63275e-06	0.00748652	0.00149026	-0.000516507	CovTest	Original	New
cg18848985	Prenatal smoking	first	first	0.0139962	5.75009e-05	0.0187798	-0.000110609	-0.000244249	CovTest	Original	New
cg24774306	Prenatal smoking	first	first	0.0124616	0.000275205	0.0372875	0.000584133	4.83005e-05	CovTest	Original	New
cg25686891	Prenatal smoking	first	first	0.0111686	0.000350682	0.0416493	0.00046503	0.00068362	CovTest	Original	New
cg26306909	Prenatal smoking	second	second	0.0158447	2.13519e-05	0.0119045	0.00052653	0.000103015	CovTest	Original	New
cg27272220	Prenatal smoking	first	first	0.0118053	5.94146e-05	0.0190515	-0.00020112	-0.000289538	CovTest	Original	New
cg01174140	Prenatal smoking	first	first	0.0174137	1.27356e-05	0.00940738	-0.00355679	-0.00548122	CovTest	Original	New
cg02249657	Prenatal smoking	accumulation	accumulation	0.0113488	0.000193205	0.0317462	NA	NA	CovTest	Original	New
cg02731554	Prenatal smoking	first	first	0.0128566	0.000128558	0.0262143	-0.000311019	0.000288714	CovTest	Original	New
cg03677126	Prenatal smoking	first	first	0.0130906	0.000263301	0.0364104	-0.00206198	-0.000257537	CovTest	Original	New
cg04549797	Prenatal smoking	first	first	0.0114102	0.000322507	0.0399961	-0.000139806	-0.000165547	CovTest	Original	New
cg05205314	Prenatal smoking	first	first	0.0136721	5.15161e-05	0.0178585	0.00251351	0.0037095	CovTest	Original	New
cg05578840	Prenatal smoking	first	first	0.0116638	0.000327027	0.0403294	-0.00281175	-0.00240456	CovTest	Original	New
cg05603791	Prenatal smoking	first	first	0.013323	2.41453e-05	0.0124914	-0.00605357	-0.00855858	CovTest	Original	New
cg08373003	Prenatal smoking	first	first	0.0102167	0.000372588	0.0428202	8.08945e-05	-0.000134616	CovTest	Original	New
cg09693432	Prenatal smoking	accumulation	accumulation	0.024784	3.08736e-08	0.000590971	NA	NA	CovTest	Original	New
cg11213898	Prenatal smoking	first	first	0.0127016	0.000139998	0.0272964	-0.00101276	-0.000982006	CovTest	Original	New
cg12882697	Prenatal smoking	first	first	0.0130163	0.00017047	0.0299676	-3.14294e-05	0.000232302	CovTest	Original	New
cg14868574	Prenatal smoking	first	first	0.0141754	9.25184e-05	0.0226792	-0.00148633	-0.00254561	CovTest	Original	New
cg15833158	Prenatal smoking	accumulation	accumulation	0.0126834	0.000450832	0.0464835	NA	NA	CovTest	Original	New
cg18431408	Prenatal smoking	first	first	0.0115499	0.000250377	0.0355627	-0.000206583	-0.000616165	CovTest	Original	New
cg19819837	Prenatal smoking	first	first	0.0128387	4.04645e-05	0.0159836	0.00335278	0.00131805	CovTest	Original	New
cg19853413	Prenatal smoking	first	first	0.0169212	1.36628e-05	0.00971467	0.000418918	-7.10451e-05	CovTest	Original	New
cg20413471	Prenatal smoking	first	first	0.0143456	3.26576e-05	0.0145819	-0.000737603	-0.000408393	CovTest	Original	New
cg20440575	Prenatal smoking	first	first	0.011284	0.000192691	0.0317227	-0.000691017	-0.000524533	CovTest	Original	New
cg22758238	Prenatal smoking	first	first	0.0110985	0.000148773	0.0280748	-0.00832696	-0.00698098	CovTest	Original	New
cg24579851	Prenatal smoking	first	first	0.0106427	0.000176988	0.0304861	-0.00265521	-0.000865996	CovTest	Original	New
cg26354587	Prenatal smoking	second	second	0.0108706	0.000266784	0.0367326	-0.000255356	-0.000131361	CovTest	Original	New
cg26584337	Prenatal smoking	first	first	0.0126912	0.000114523	0.025047	-0.00132311	-0.00199833	CovTest	Original	New
cg27090062	Prenatal smoking	first	first	0.0142068	2.5424e-05	0.0127921	0.00021528	-0.000618227	CovTest	Original	New
cg01600222	Prenatal smoking	first	first	0.0113038	0.000182601	0.0309617	-0.000913486	-0.00061681	CovTest	Original	New
cg04199621	Prenatal smoking	first	first	0.0115837	0.000347144	0.0414293	0.000936713	0.000636825	CovTest	Original	New
cg05009934	Prenatal smoking	first	first	0.0125634	0.000268352	0.0368394	-6.01966e-05	-0.000116757	CovTest	Original	New
cg05858612	Prenatal smoking	first	first	0.01569	1.17961e-05	0.00911696	0.00152328	0.000682882	CovTest	Original	New
cg07157396	Prenatal smoking	first	first	0.0127414	6.66779e-05	0.0198885	-0.00134663	-0.0012833	CovTest	Original	New
cg10624161	Prenatal smoking	first	first	0.0120238	0.000511351	0.049609	-0.000867124	-0.00150452	CovTest	Original	New
cg10872107	Prenatal smoking	accumulation	accumulation	0.0105301	0.000259422	0.0361096	NA	NA	CovTest	Original	New
cg10894807	Prenatal smoking	first	first	0.0159279	5.22069e-06	0.00632507	0.000650774	0.00170361	CovTest	Original	New
cg10969178	Prenatal smoking	first	first	0.0125169	0.000439158	0.0460119	-0.00136386	0.000232356	CovTest	Original	New
cg10978034	Prenatal smoking	first	first	0.0109526	0.000296043	0.0385191	-0.00231503	-0.00174133	CovTest	Original	New
cg11108115	Prenatal smoking	first	first	0.0127883	0.000211083	0.0328953	-0.000749995	-7.91624e-05	CovTest	Original	New
cg11553183	Prenatal smoking	first	first	0.0136136	6.03765e-05	0.0192339	-0.0025874	-0.00299219	CovTest	Original	New
cg13223107	Prenatal smoking	first	first	0.0145081	9.08836e-06	0.00793892	-0.00236133	-0.00206802	CovTest	Original	New
cg13738144	Prenatal smoking	first	first	0.0124389	0.000213978	0.0331476	-6.14335e-05	-0.00279694	CovTest	Original	New
cg13784621	Prenatal smoking	first	first	0.0137951	3.05184e-05	0.0140637	-0.0010866	-0.00142378	CovTest	Original	New
cg14142171	Prenatal smoking	first	first	0.0107856	0.000181775	0.0309107	0.0066726	0.00569567	CovTest	Original	New
cg14769991	Prenatal smoking	second	second	0.0120938	0.000435912	0.0458574	0.00635573	0.0110768	CovTest	Original	New
cg15861059	Prenatal smoking	first	first	0.0141005	2.13615e-05	0.0119045	8.97112e-05	0.000297752	CovTest	Original	New
cg17386213	Prenatal smoking	first	first	0.0152902	5.4547e-06	0.0063971	0.000119749	5.00028e-05	CovTest	Original	New
cg18691800	Prenatal smoking	second	second	0.0104235	0.000426773	0.0454509	-0.000568242	-0.00028697	CovTest	Original	New
cg21130236	Prenatal smoking	first	first	0.0150868	4.3788e-06	0.00587743	-0.00270763	-0.00135291	CovTest	Original	New
cg21413492	Prenatal smoking	first	first	0.018258	1.4347e-06	0.0034937	0.00830339	0.00717751	CovTest	Original	New
cg22662036	Prenatal smoking	first	first	0.0179381	4.77317e-06	0.0060813	-0.000650944	-0.000630057	CovTest	Original	New
cg23003315	Prenatal smoking	first	first	0.0167716	1.2781e-05	0.00940738	-0.0032175	-0.00623498	CovTest	Original	New
cg24185832	Prenatal smoking	accumulation	accumulation	0.0118589	9.61861e-05	0.023137	NA	NA	CovTest	Original	New
cg26131286	Prenatal smoking	first	first	0.0159444	6.64925e-05	0.0198885	-0.00278307	-0.00336294	CovTest	Original	New
cg00020340	Prenatal smoking	second	second	0.0179373	8.66556e-07	0.00279167	0.00124141	0.00196274	CovTest	Original	New
cg00129269	Prenatal smoking	first	first	0.0134659	4.83311e-05	0.0173557	-0.00020951	-0.000163417	CovTest	Original	New
cg00314904	Prenatal smoking	first	first	0.0107493	0.000244165	0.0352098	0.00129115	0.0019402	CovTest	Original	New
cg01008256	Prenatal smoking	first	first	0.0152144	1.71667e-05	0.0109216	-0.00279311	-0.00132912	CovTest	Original	New
cg03150622	Prenatal smoking	first	first	0.0101805	0.00042139	0.0452819	-0.000480555	-0.000194497	CovTest	Original	New
cg05850720	Prenatal smoking	first	first	0.011722	0.000215588	0.0331874	-0.000507858	0.00120314	CovTest	Original	New
cg06371632	Prenatal smoking	first	first	0.0144749	0.000221592	0.033571	-0.000200687	-0.000229421	CovTest	Original	New
cg07542748	Prenatal smoking	first	first	0.0134521	0.000139101	0.0272179	-0.00336015	-0.00498788	CovTest	Original	New
cg08179898	Prenatal smoking	first	first	0.0116607	0.000248721	0.0354722	9.61489e-05	-8.83226e-05	CovTest	Original	New
cg08769356	Prenatal smoking	second	second	0.0124563	0.000176198	0.0304324	-0.000568154	-0.000407024	CovTest	Original	New
cg09883131	Prenatal smoking	first	first	0.0129989	2.48862e-05	0.0127251	-0.000551535	-0.000448804	CovTest	Original	New
cg10612867	Prenatal smoking	first	first	0.0096359	0.000450838	0.0464835	0.000122478	-0.000142898	CovTest	Original	New
cg11698888	Prenatal smoking	first	first	0.0166197	1.07743e-05	0.00865596	-0.000472939	-0.00101789	CovTest	Original	New
cg13267931	Prenatal smoking	first	first	0.0128718	0.000168695	0.0297369	-0.00102141	-0.0010405	CovTest	Original	New
cg16956426	Prenatal smoking	first	first	0.0123996	3.9907e-05	0.0158855	-0.00231634	-0.00253838	CovTest	Original	New
cg17365504	Prenatal smoking	first	first	0.00959126	0.000481716	0.0481122	-0.000202512	-0.000223606	CovTest	Original	New
cg18023771	Prenatal smoking	first	first	0.0111619	0.000216315	0.0331912	0.00140292	0.00165471	CovTest	Original	New
cg18582362	Prenatal smoking	first	first	0.0145858	1.82e-05	0.0112201	-0.00522945	-0.0053688	CovTest	Original	New
cg19239040	Prenatal smoking	first	first	0.0125589	6.47556e-05	0.0197352	0.00135074	-0.000400411	CovTest	Original	New
cg19346507	Prenatal smoking	second	second	0.0109207	0.00020029	0.0322043	4.57505e-05	-6.31362e-05	CovTest	Original	New
cg19838156	Prenatal smoking	first	first	0.0118291	0.000364689	0.0423553	0.00131593	0.000681441	CovTest	Original	New
cg20202078	Prenatal smoking	second	second	0.0133479	0.000217153	0.0332417	0.000129636	-3.60411e-05	CovTest	Original	New
cg20397034	Prenatal smoking	first	first	0.0113105	0.000208523	0.0327753	-0.000393376	-0.00131094	CovTest	Original	New
cg20959907	Prenatal smoking	accumulation	accumulation	0.016868	4.34091e-05	0.0165589	NA	NA	CovTest	Original	New
cg22159387	Prenatal smoking	second	second	0.0201548	3.53584e-07	0.00192182	0.000508931	0.000198514	CovTest	Original	New
cg23305129	Prenatal smoking	accumulation	accumulation	0.0147815	9.36343e-06	0.00808297	NA	NA	CovTest	Original	New
cg24383018	Prenatal smoking	first	first	0.0117475	9.07724e-05	0.0225272	0.00234233	0.00616763	CovTest	Original	New
cg26045524	Prenatal smoking	first	first	0.0102547	0.000312595	0.039422	-0.00771248	-0.00386147	CovTest	Original	New
cg26075417	Prenatal smoking	first	first	0.00965124	0.000425057	0.0453879	0.00145346	0.00118773	CovTest	Original	New
cg27493928	Prenatal smoking	first	first	0.0129799	4.34418e-05	0.0165589	-0.000418232	-0.000346139	CovTest	Original	New
cg27633530	Prenatal smoking	first	first	0.0142566	6.85132e-05	0.0200956	-0.000204033	-0.00143227	CovTest	Original	New
cg01506891	Prenatal smoking	first	first	0.0112084	0.000238756	0.0348752	-0.000497063	-0.000208005	CovTest	Original	New
cg02237470	Prenatal smoking	first	first	0.00999284	0.000390465	0.0437751	0.000449799	6.56281e-06	CovTest	Original	New
cg05989625	Prenatal smoking	first	first	0.0134223	0.000133031	0.0266447	0.00172995	0.0033236	CovTest	Original	New
cg07613656	Prenatal smoking	first	first	0.01337	3.01817e-05	0.0139681	0.00012154	0.000343525	CovTest	Original	New
cg08081156	Prenatal smoking	recency	recency	0.016021	5.60378e-06	0.00644152	NA	NA	CovTest	Original	New
cg11945167	Prenatal smoking	first	first	0.0135473	1.9114e-05	0.0114391	-0.00786101	-0.00958737	CovTest	Original	New
cg13720284	Prenatal smoking	second	second	0.0133629	0.000101209	0.0237389	0.000642499	0.00922408	CovTest	Original	New
cg14592752	Prenatal smoking	first	first	0.0141426	2.08172e-05	0.01169	-0.00132759	-0.000183684	CovTest	Original	New
cg15393676	Prenatal smoking	first	first	0.010821	0.000157886	0.0289003	0.00133749	0.000407362	CovTest	Original	New
cg15461550	Prenatal smoking	first	first	0.0136828	0.000146114	0.0278837	-0.000930269	-0.00128221	CovTest	Original	New
cg19844326	Prenatal smoking	first	first	0.015859	1.77153e-05	0.0110786	-0.00131243	-0.00361996	CovTest	Original	New
cg21086940	Prenatal smoking	first	first	0.0109692	0.000217395	0.0332671	0.00213112	-0.00235006	CovTest	Original	New
cg21511365	Prenatal smoking	first	first	0.0113751	0.000437412	0.0459274	-0.00013939	-0.000648601	CovTest	Original	New
cg21658235	Prenatal smoking	first	first	0.0119709	0.000265186	0.036572	-0.00137556	-0.000710318	CovTest	Original	New
cg21843258	Prenatal smoking	first	first	0.0128488	0.000315906	0.039608	-0.000431057	-0.000220697	CovTest	Original	New
cg24141036	Prenatal smoking	first	first	0.0125665	6.98161e-05	0.020219	-0.00028707	-0.000130713	CovTest	Original	New
cg24930856	Prenatal smoking	first	first	0.0143172	7.81958e-05	0.0211984	0.00252429	0.00372166	CovTest	Original	New
cg26225406	Prenatal smoking	first	first	0.0112112	0.000182182	0.0309441	-0.0102723	-0.00775342	CovTest	Original	New
cg13469457	Prenatal smoking	first	first	0.0118234	0.000135609	0.026946	0.000209308	0.000551212	CovTest	Original	New
cg13931725	Prenatal smoking	first	first	0.0118444	0.000176857	0.0304861	-0.00284575	-0.00291133	CovTest	Original	New
cg14081465	Prenatal smoking	first	first	0.0142978	4.48563e-05	0.01675	-0.00227155	-0.00230914	CovTest	Original	New
cg00816387	Prenatal smoking	first	first	0.0113458	9.04923e-05	0.0225272	0.00956493	0.00982552	CovTest	Original	New
cg01380878	Prenatal smoking	first	first	0.0119188	5.76957e-05	0.0188016	-3.26784e-05	-0.000450238	CovTest	Original	New
cg02433884	Prenatal smoking	first	first	0.0130557	0.000281704	0.0376738	-0.000327562	-9.68869e-05	CovTest	Original	New
cg05264189	Prenatal smoking	first	first	0.0119179	0.000290555	0.0381847	0.000523808	0.0034381	CovTest	Original	New
cg05964557	Prenatal smoking	first	first	0.0132002	0.000194375	0.0318005	0.00632266	0.011804	CovTest	Original	New
cg06756291	Prenatal smoking	first	first	0.0106657	0.000199843	0.0322043	0.00630341	0.0104191	CovTest	Original	New
cg07104958	Prenatal smoking	first	first	0.0143744	2.35955e-05	0.0123352	0.00206316	0.00326846	CovTest	Original	New
cg08518631	Prenatal smoking	first	first	0.0107971	0.000211313	0.0328953	-0.000711447	-0.000518019	CovTest	Original	New
cg08651763	Prenatal smoking	second	second	0.0249668	7.30609e-09	0.00040984	-0.000547784	-0.000345071	CovTest	Original	New
cg11404502	Prenatal smoking	first	first	0.00962693	0.000474413	0.0477489	-0.000878284	-5.52941e-05	CovTest	Original	New
cg12708799	Prenatal smoking	first	first	0.0134133	2.84665e-05	0.0134904	0.00239368	0.0044906	CovTest	Original	New
cg14018140	Prenatal smoking	first	first	0.0111787	0.000489578	0.0484686	0.00159209	0.00155387	CovTest	Original	New
cg14408590	Prenatal smoking	first	first	0.0131566	3.42126e-05	0.0148015	0.00036117	-2.50804e-05	CovTest	Original	New
cg14899522	Prenatal smoking	first	first	0.0106616	0.000214259	0.0331677	0.00189261	0.000963543	CovTest	Original	New
cg15433798	Prenatal smoking	first	first	0.0123597	0.000215647	0.0331874	-0.00434631	-0.00247947	CovTest	Original	New
cg18817750	Prenatal smoking	first	first	0.0135671	4.52063e-05	0.0168346	0.00342895	0.00482697	CovTest	Original	New
cg20709805	Prenatal smoking	first	first	0.0103358	0.000390208	0.0437581	-0.00143954	-0.00148286	CovTest	Original	New
cg23095743	Prenatal smoking	first	first	0.0169354	2.34497e-06	0.00428377	-0.00232207	-0.00206553	CovTest	Original	New
cg26276294	Prenatal smoking	first	first	0.0103383	0.000325745	0.040239	0.000885966	0.000177604	CovTest	Original	New
cg26418881	Prenatal smoking	first	first	0.0130817	5.06191e-05	0.0177448	0.000799482	0.00310532	CovTest	Original	New
cg26426564	Prenatal smoking	first	first	0.0122953	4.90897e-05	0.0175344	-0.00477968	-0.00607391	CovTest	Original	New
cg26596964	Prenatal smoking	second	second	0.0098035	0.000473741	0.0477489	0.000235177	4.02448e-05	CovTest	Original	New
cg27479418	Prenatal smoking	first	first	0.0140367	4.61166e-05	0.0169475	-0.000883206	-0.000472443	CovTest	Original	New
cg02021485	Prenatal smoking	first	first	0.0100122	0.0002686	0.0368471	-0.00299363	-0.00208992	CovTest	Original	New
cg02299971	Prenatal smoking	first	first	0.0132832	9.92937e-05	0.0234773	-0.000324814	0.0010796	CovTest	Original	New
cg02408252	Prenatal smoking	first	first	0.0105928	0.000442982	0.0462007	0.00407612	0.00363792	CovTest	Original	New
cg05029822	Prenatal smoking	first	first	0.0120649	0.000165569	0.0295114	-0.00197157	-0.00531561	CovTest	Original	New
cg05042743	Prenatal smoking	first	first	0.0134521	5.53941e-05	0.0185941	0.00117297	0.000514056	CovTest	Original	New
cg05516327	Prenatal smoking	accumulation	accumulation	0.0111238	0.000259115	0.0361004	NA	NA	CovTest	Original	New
cg06266514	Prenatal smoking	first	first	0.0125954	8.14239e-05	0.0216339	0.00162855	-0.000208385	CovTest	Original	New
cg07293584	Prenatal smoking	first	first	0.0122489	0.000255981	0.03592	-0.00201555	-0.00349694	CovTest	Original	New
cg07688490	Prenatal smoking	first	first	0.0116671	0.000253438	0.0357556	-0.00164041	-0.00185726	CovTest	Original	New
cg07703079	Prenatal smoking	first	first	0.00987238	0.00040358	0.0444875	0.00245399	0.0046437	CovTest	Original	New
cg08560888	Prenatal smoking	first	first	0.0136755	6.66208e-05	0.0198885	-0.00157384	-0.0016385	CovTest	Original	New
cg09197492	Prenatal smoking	first	first	0.011147	0.000283212	0.0377608	-0.00118465	-0.000551721	CovTest	Original	New
cg09336922	Prenatal smoking	first	first	0.0115981	0.000101936	0.0238587	-0.00288846	-0.00328991	CovTest	Original	New
cg09894698	Prenatal smoking	second	second	0.0207055	6.62128e-07	0.0024704	0.000105118	7.27582e-05	CovTest	Original	New
cg10572969	Prenatal smoking	first	first	0.015489	4.17981e-06	0.00576862	-0.000314133	-0.000181652	CovTest	Original	New
cg12145289	Prenatal smoking	first	first	0.0150583	8.02192e-06	0.00755183	0.00254858	0.00342161	CovTest	Original	New
cg12570756	Prenatal smoking	second	second	0.00987661	0.00042244	0.045338	0.000509813	-0.000319801	CovTest	Original	New
cg13096405	Prenatal smoking	first	first	0.0159822	1.8875e-05	0.0114147	0.00321423	0.00529047	CovTest	Original	New
cg14780632	Prenatal smoking	first	first	0.0151078	5.28936e-06	0.00632793	-0.00141424	-0.000905687	CovTest	Original	New
cg15863552	Prenatal smoking	first	first	0.0137483	2.29736e-05	0.0121712	0.00543133	0.00809221	CovTest	Original	New
cg16499607	Prenatal smoking	first	first	0.0106092	0.000379839	0.0430799	-0.00283734	-0.00206693	CovTest	Original	New
cg17976635	Prenatal smoking	first	first	0.012592	0.000109184	0.0245736	-6.19794e-05	-0.000229272	CovTest	Original	New
cg18180394	Prenatal smoking	first	first	0.0158363	2.98952e-06	0.00472892	-2.45008e-06	-0.000247447	CovTest	Original	New
cg19811337	Prenatal smoking	first	first	0.0102089	0.000242144	0.0350913	0.00549171	0.00447633	CovTest	Original	New
cg21986781	Prenatal smoking	first	first	0.0141667	8.80928e-06	0.00785706	7.46369e-05	-7.42798e-05	CovTest	Original	New
cg23897913	Prenatal smoking	first	first	0.0104195	0.000226974	0.0339732	-0.00145306	-0.00266343	CovTest	Original	New
cg24543696	Prenatal smoking	first	first	0.0140043	1.08754e-05	0.00869511	-0.000747781	-0.000793263	CovTest	Original	New
cg24985525	Prenatal smoking	first	first	0.0116612	0.000150668	0.0282146	-0.000499003	-0.000109146	CovTest	Original	New
cg25439992	Prenatal smoking	first	first	0.0134388	0.00033266	0.0407501	-0.0013486	-0.000597562	CovTest	Original	New
cg25561875	Prenatal smoking	first	first	0.0123378	9.31689e-05	0.0227879	-0.00396989	-0.0033787	CovTest	Original	New
cg26679405	Prenatal smoking	second	second	0.0211707	1.61069e-06	0.0035814	-0.00022938	-0.000295089	CovTest	Original	New
cg27475586	Prenatal smoking	first	first	0.012039	0.000181229	0.0308771	-0.00359318	-0.00176174	CovTest	Original	New
cg00155485	Prenatal smoking	first	first	0.0132572	0.000375362	0.0428825	0.000203208	-0.000248664	CovTest	Original	New
cg03668470	Prenatal smoking	first	first	0.0142941	9.48533e-05	0.0229921	-0.00111626	-0.000732052	CovTest	Original	New
cg04953535	Prenatal smoking	first	first	0.0114309	0.000420951	0.0452819	-0.000915937	-0.00047702	CovTest	Original	New
cg05578030	Prenatal smoking	first	first	0.0128136	0.000363487	0.0423443	-0.000239267	-0.000327295	CovTest	Original	New
cg05648324	Prenatal smoking	first	first	0.0124322	0.000119064	0.0254401	0.00160412	0.00128232	CovTest	Original	New
cg05738240	Prenatal smoking	first	first	0.0146846	8.93931e-06	0.0079028	-0.000320712	0.000816981	CovTest	Original	New
cg05932702	Prenatal smoking	first	first	0.0123697	4.45783e-05	0.0167299	0.00123617	-0.00232735	CovTest	Original	New
cg06126225	Prenatal smoking	accumulation	accumulation	0.0132934	0.000410417	0.0447471	NA	NA	CovTest	Original	New
cg09357135	Prenatal smoking	first	first	0.0111158	0.000462595	0.0471488	-0.000311498	-0.000203419	CovTest	Original	New
cg10671668	Prenatal smoking	first	first	0.0139557	0.000136339	0.0269544	-0.00530293	-0.00452004	CovTest	Original	New
cg12068088	Prenatal smoking	first	first	0.0143356	9.6648e-05	0.0231581	0.013542	0.0140965	CovTest	Original	New
cg12388583	Prenatal smoking	first	first	0.0112444	0.000517393	0.0498791	-0.000826453	-0.00051637	CovTest	Original	New
cg13284081	Prenatal smoking	accumulation	accumulation	0.0140209	0.000249326	0.0355004	NA	NA	CovTest	Original	New
cg13615998	Prenatal smoking	first	first	0.0187098	1.28061e-06	0.00328365	0.000895393	-0.000371169	CovTest	Original	New
cg15473325	Prenatal smoking	first	first	0.0098723	0.000368171	0.0425852	-3.12573e-05	-1.37392e-05	CovTest	Original	New
cg15602829	Prenatal smoking	first	first	0.0120199	0.000171757	0.0300187	-0.000725885	-0.00035532	CovTest	Original	New
cg15702800	Prenatal smoking	second	second	0.0161281	1.9503e-05	0.0114775	0.000403079	0.000110546	CovTest	Original	New
cg16136038	Prenatal smoking	first	first	0.0184577	9.742e-07	0.00288938	-5.15302e-05	-0.000412613	CovTest	Original	New
cg16641986	Prenatal smoking	first	first	0.0119632	0.000292738	0.0383116	-0.000874853	-0.000162042	CovTest	Original	New
cg19743522	Prenatal smoking	first	first	0.0148988	2.22178e-05	0.012004	0.00417891	0.0072808	CovTest	Original	New
cg21041100	Prenatal smoking	second	second	0.0109471	0.000366501	0.0424953	0.00961941	0.00830448	CovTest	Original	New
cg21549333	Prenatal smoking	first	first	0.0125003	9.95916e-05	0.0235099	-0.000501186	-0.000273621	CovTest	Original	New
cg21707187	Prenatal smoking	second	second	0.0132308	1.91801e-05	0.0114391	0.000167722	1.88053e-05	CovTest	Original	New
cg22813950	Prenatal smoking	first	first	0.012328	0.000173558	0.0302016	-0.000315003	-0.00341728	CovTest	Original	New
cg24050511	Prenatal smoking	first	first	0.0107357	0.000191103	0.0316176	0.000149071	-0.000148559	CovTest	Original	New
cg24234651	Prenatal smoking	first	first	0.0117862	0.000104795	0.0241936	0.00130318	0.000363169	CovTest	Original	New
cg25710178	Prenatal smoking	first	first	0.0129432	3.671e-05	0.0153776	0.000246287	-2.50495e-05	CovTest	Original	New
cg26502610	Prenatal smoking	first	first	0.01679	2.49191e-06	0.00437503	0.00238963	0.00317934	CovTest	Original	New
cg26865201	Prenatal smoking	first	first	0.0158161	0.000128425	0.0262143	0.00102645	0.000316314	CovTest	Original	New
cg27630311	Prenatal smoking	first	first	0.0137894	1.38553e-05	0.00971467	3.136e-05	-0.000398881	CovTest	Original	New
cg08605016	Prenatal smoking	first	first	0.0101258	0.000301799	0.0388165	-0.00110817	-0.000528697	CovTest	Original	New
cg09010671	Prenatal smoking	first	first	0.0136999	1.29688e-05	0.00951601	0.000741314	0.000144623	CovTest	Original	New
cg09473359	Prenatal smoking	first	first	0.0140315	8.51961e-05	0.0220531	0.00494883	0.0035714	CovTest	Original	New
cg16505056	Prenatal smoking	first	first	0.0106084	0.000462384	0.0471439	0.000424788	6.96223e-05	CovTest	Original	New
cg19465159	Prenatal smoking	first	first	0.0105391	0.000500789	0.0490164	0.00232407	0.00569397	CovTest	Original	New
cg20279561	Prenatal smoking	first	first	0.0102457	0.000249287	0.0355004	0.00186654	0.00114964	CovTest	Original	New
cg21385666	Prenatal smoking	first	first	0.0115742	0.000126654	0.0261611	-0.000330019	-0.000991949	CovTest	Original	New
cg21622536	Prenatal smoking	accumulation	accumulation	0.0157574	3.91187e-05	0.015745	NA	NA	CovTest	Original	New
cg01233722	Prenatal smoking	first	first	0.0114035	0.000183824	0.0309869	-0.000894189	-0.00113494	CovTest	Original	New
cg02852670	Prenatal smoking	first	first	0.0126578	3.92096e-05	0.015745	0.000713151	0.0012393	CovTest	Original	New
cg04561727	Prenatal smoking	first	first	0.0110584	0.000167204	0.0296586	-0.00479222	-0.00597723	CovTest	Original	New
cg04937402	Prenatal smoking	first	first	0.0119101	8.54258e-05	0.0220532	-0.000382364	-0.000654312	CovTest	Original	New
cg09844916	Prenatal smoking	first	first	0.0156975	1.67399e-05	0.0107638	5.70207e-05	-7.14311e-05	CovTest	Original	New
cg14010914	Prenatal smoking	first	first	0.0144979	2.23477e-05	0.0120131	-1.084e-05	4.04013e-05	CovTest	Original	New
cg14531093	Prenatal smoking	recency	recency	0.0109515	0.00037828	0.0429817	NA	NA	CovTest	Original	New
cg18512313	Prenatal smoking	second	second	0.0121181	0.000168475	0.0297369	0.00547954	0.00961434	CovTest	Original	New
cg23564928	Prenatal smoking	first	first	0.0114792	0.000340278	0.0411182	0.000332523	3.68892e-05	CovTest	Original	New
cg25592858	Prenatal smoking	first	first	0.00957526	0.00042294	0.045338	0.00296454	0.0023385	CovTest	Original	New
cg26120093	Prenatal smoking	first	first	0.011073	0.000115163	0.0251534	0.000619297	0.00120054	CovTest	Original	New
cg00392242	Prenatal smoking	second	second	0.0195528	6.46828e-07	0.00246892	-0.000670167	-0.000254044	CovTest	Original	New
cg02273617	Prenatal smoking	first	first	0.0101003	0.000464855	0.0472755	-1.61229e-05	-0.000179217	CovTest	Original	New
cg02585886	Prenatal smoking	first	first	0.0183138	1.95976e-06	0.00376768	-0.000244296	-0.000245156	CovTest	Original	New
cg05415308	Prenatal smoking	first	first	0.020494	9.77286e-08	0.00107811	0.00484253	0.00948056	CovTest	Original	New
cg06022179	Prenatal smoking	first	first	0.0115364	0.000378202	0.0429817	0.00146465	-0.00104434	CovTest	Original	New
cg06756227	Prenatal smoking	first	first	0.0128157	6.27613e-05	0.0195135	-2.09137e-05	-0.00165199	CovTest	Original	New
cg06829968	Prenatal smoking	first	first	0.0110622	0.000388147	0.0435707	-0.000373755	-0.000209982	CovTest	Original	New
cg09395572	Prenatal smoking	first	first	0.0120837	7.85104e-05	0.0212321	0.00298836	0.00497152	CovTest	Original	New
cg10272675	Prenatal smoking	second	second	0.0115865	7.9792e-05	0.0214193	-0.000899674	-0.000387653	CovTest	Original	New
cg10631289	Prenatal smoking	first	first	0.0122738	0.000131489	0.026518	0.00198006	0.0064677	CovTest	Original	New
cg12309172	Prenatal smoking	first	first	0.0135114	4.77135e-05	0.0172426	-0.00128853	0.000571099	CovTest	Original	New
cg12635019	Prenatal smoking	first	first	0.0149934	1.21007e-05	0.00920103	0.000275965	-0.000207386	CovTest	Original	New
cg19165854	Prenatal smoking	first	first	0.0162725	4.30879e-05	0.0165098	-0.00195539	-0.000430128	CovTest	Original	New
cg21057249	Prenatal smoking	first	first	0.0145376	2.60824e-05	0.0128833	-0.000236142	-0.000208613	CovTest	Original	New
cg21895387	Prenatal smoking	first	first	0.0115007	7.68966e-05	0.0210668	-0.0084314	-0.00698833	CovTest	Original	New
cg22178798	Prenatal smoking	first	first	0.0156047	7.78803e-06	0.00748773	0.00434025	0.00250595	CovTest	Original	New
cg23846955	Prenatal smoking	first	first	0.0186628	1.46015e-06	0.0034937	-4.37506e-05	0.00205443	CovTest	Original	New
cg24373369	Prenatal smoking	first	first	0.0158301	1.59433e-05	0.0104142	-0.00818005	-0.0108706	CovTest	Original	New
cg25404375	Prenatal smoking	first	first	0.01772	7.32566e-06	0.0072803	-0.00649659	-0.00812746	CovTest	Original	New
cg26173375	Prenatal smoking	first	first	0.0149996	8.12105e-06	0.00759662	-0.0109718	-0.00795741	CovTest	Original	New
cg26654798	Prenatal smoking	first	first	0.0150531	7.17974e-06	0.00718375	-0.000636151	-0.00101434	CovTest	Original	New
cg26739280	Prenatal smoking	first	first	0.0106716	0.000286718	0.0379524	-0.00020872	-0.000148385	CovTest	Original	New
cg27021986	Prenatal smoking	first	first	0.0156164	5.96939e-05	0.0190993	-0.000892697	-0.000405822	CovTest	Original	New
cg00133234	Prenatal smoking	first	first	0.0128863	7.79227e-05	0.0211928	0.00266012	0.0047468	CovTest	Original	New
cg00737801	Prenatal smoking	first	first	0.0134247	6.35652e-05	0.01957	0.000377449	0.000476346	CovTest	Original	New
cg01904216	Prenatal smoking	second	second	0.0156916	2.66232e-05	0.0130379	-0.00894711	-0.00718646	CovTest	Original	New
cg02370953	Prenatal smoking	first	first	0.0113763	0.000105693	0.0242987	-0.000511798	0.000809051	CovTest	Original	New
cg02659041	Prenatal smoking	first	first	0.0124848	7.56437e-05	0.0208603	0.00613321	0.0107285	CovTest	Original	New
cg02823132	Prenatal smoking	first	first	0.0124789	5.05722e-05	0.0177448	-0.00140187	0.000469953	CovTest	Original	New
cg03362815	Prenatal smoking	first	first	0.0158654	1.05157e-05	0.00851263	-0.000745353	-0.000356716	CovTest	Original	New
cg03911494	Prenatal smoking	first	first	0.0107895	0.000227101	0.0339732	-5.87476e-05	-0.000149396	CovTest	Original	New
cg04861014	Prenatal smoking	second	second	0.0132405	1.97016e-05	0.0114775	0.000316213	-1.36502e-05	CovTest	Original	New
cg04891924	Prenatal smoking	first	first	0.0114667	0.000107045	0.0244145	0.00626247	0.00929514	CovTest	Original	New
cg05290300	Prenatal smoking	first	first	0.0117875	6.43728e-05	0.0197083	-0.00372842	-0.00467072	CovTest	Original	New
cg09080729	Prenatal smoking	first	first	0.0163762	1.90354e-05	0.0114331	0.00205892	0.00143413	CovTest	Original	New
cg09195198	Prenatal smoking	second	second	0.020863	2.01067e-07	0.00151411	-0.00117917	-0.000465116	CovTest	Original	New
cg09247255	Prenatal smoking	first	first	0.0135271	2.53024e-05	0.0127921	0.00248236	0.00437001	CovTest	Original	New
cg09549813	Prenatal smoking	first	first	0.012744	9.66224e-05	0.0231581	-0.00492461	-0.00529082	CovTest	Original	New
cg16486327	Prenatal smoking	first	first	0.0105792	0.00031533	0.0395742	-0.000235817	0.000437737	CovTest	Original	New
cg16597345	Prenatal smoking	first	first	0.0106514	0.000208176	0.0327441	0.000126568	-0.000168027	CovTest	Original	New
cg16735986	Prenatal smoking	first	first	0.00983987	0.00043689	0.0459005	-0.000252249	-0.00227541	CovTest	Original	New
cg26549525	Prenatal smoking	first	first	0.0112018	0.000139771	0.0272829	-9.43207e-06	-0.000114564	CovTest	Original	New
cg26927231	Prenatal smoking	first	first	0.0104568	0.000416809	0.0450976	-0.00179161	-0.00308766	CovTest	Original	New
cg27120816	Prenatal smoking	first	first	0.0108234	0.000236309	0.0346673	-0.00117216	-0.000611857	CovTest	Original	New
cg00950381	Prenatal smoking	first	first	0.0132355	5.54433e-05	0.0185941	-0.00864306	-0.0126256	CovTest	Original	New
cg02097604	Prenatal smoking	first	first	0.0129733	4.36274e-05	0.0166009	-0.00172895	0.00305455	CovTest	Original	New
cg02458198	Prenatal smoking	accumulation	accumulation	0.0154897	2.56781e-05	0.0128574	NA	NA	CovTest	Original	New
cg04370807	Prenatal smoking	first	first	0.0119859	0.000119952	0.02551	-0.000787332	-0.000504221	CovTest	Original	New
cg04917446	Prenatal smoking	second	second	0.0112651	0.000105862	0.0243122	0.0112707	0.0196413	CovTest	Original	New
cg05059663	Prenatal smoking	first	first	0.010555	0.000171401	0.0300187	-7.97455e-05	-0.00028211	CovTest	Original	New
cg06550704	Prenatal smoking	first	first	0.011083	0.000162138	0.0293755	-0.00684443	-0.00840474	CovTest	Original	New
cg07723258	Prenatal smoking	first	first	0.0140458	3.0904e-05	0.014149	-0.00507103	-0.00536135	CovTest	Original	New
cg08886727	Prenatal smoking	first	first	0.0145632	9.28554e-06	0.0080452	-0.00115295	-0.000929272	CovTest	Original	New
cg09120188	Prenatal smoking	first	first	0.0106506	0.000337475	0.0410342	-0.00272745	-0.00149644	CovTest	Original	New
cg09237133	Prenatal smoking	first	first	0.0118754	9.30795e-05	0.0227787	-0.000215902	0.000234802	CovTest	Original	New
cg11014070	Prenatal smoking	second	second	0.00955795	0.00041562	0.0450888	0.00075385	0.000133721	CovTest	Original	New
cg14668747	Prenatal smoking	second	second	0.0116134	0.000447204	0.0463169	-0.000555262	3.14438e-06	CovTest	Original	New
cg14783904	Prenatal smoking	first	first	0.0112875	0.000315202	0.0395695	0.00357165	0.00583486	CovTest	Original	New
cg15778497	Prenatal smoking	first	first	0.0103556	0.000486194	0.0483075	0.00671205	0.0102907	CovTest	Original	New
cg16514513	Prenatal smoking	first	first	0.0110877	0.000139571	0.0272734	0.00236801	0.00353461	CovTest	Original	New
cg17812788	Prenatal smoking	first	first	0.0116842	0.000172151	0.0300638	-0.00119825	-0.000506175	CovTest	Original	New
cg18059383	Prenatal smoking	first	first	0.0139555	0.000213222	0.0330653	-0.0021662	-0.00163411	CovTest	Original	New
cg19026207	Prenatal smoking	first	first	0.0128764	0.000262062	0.0362927	-0.00115667	-0.000657646	CovTest	Original	New
cg19693015	Prenatal smoking	recency	recency	0.0169796	1.08794e-05	0.00869511	NA	NA	CovTest	Original	New
cg21378393	Prenatal smoking	first	first	0.0116226	0.000405473	0.0444878	0.000176167	-2.32709e-05	CovTest	Original	New
cg21383495	Prenatal smoking	first	first	0.0147377	4.53497e-05	0.0168346	0.000228432	-0.000549475	CovTest	Original	New
cg22090150	Prenatal smoking	first	first	0.0129233	0.000276735	0.0374022	0.00160843	0.00136386	CovTest	Original	New
cg24132481	Prenatal smoking	first	first	0.0116796	0.000121171	0.0256128	-0.00433889	-0.00742416	CovTest	Original	New
cg25752539	Prenatal smoking	first	first	0.0142816	4.33157e-05	0.0165589	0.000553837	0.00131896	CovTest	Original	New
cg26385993	Prenatal smoking	first	first	0.0119222	0.000118807	0.0254401	-0.000975042	-0.00114607	CovTest	Original	New
cg27592868	Prenatal smoking	first	first	0.0122978	0.000353482	0.0417891	-0.000576189	-0.000541405	CovTest	Original	New
cg05350020	Prenatal smoking	first	first	0.0142513	1.25337e-05	0.00934328	0.00248316	0.00497677	CovTest	Original	New
cg05578802	Prenatal smoking	first	first	0.0192017	6.13359e-07	0.00246892	0.000221603	0.00234882	CovTest	Original	New
cg06575626	Prenatal smoking	first	first	0.0123202	5.41555e-05	0.0183261	0.00247519	0.00332047	CovTest	Original	New
cg07015525	Prenatal smoking	first	first	0.0109453	0.000391761	0.0438395	0.00105779	0.00315913	CovTest	Original	New
cg12816979	Prenatal smoking	first	first	0.012747	9.7005e-05	0.0232006	-0.00139125	-0.000668804	CovTest	Original	New
cg16238918	Prenatal smoking	first	first	0.0126481	6.58115e-05	0.0198316	-0.00481166	-0.00652861	CovTest	Original	New
cg27106643	Prenatal smoking	first	first	0.0130101	3.19107e-05	0.0143497	-0.0095505	-0.00979144	CovTest	Original	New
cg01335597	Prenatal smoking	first	first	0.0117082	0.000498426	0.0489156	-0.00585359	-0.00270554	CovTest	Original	New
cg02285278	Prenatal smoking	accumulation	accumulation	0.0151727	0.000265129	0.036572	NA	NA	CovTest	Original	New
cg04614053	Prenatal smoking	first	first	0.0131393	0.00024852	0.0354661	-4.90608e-05	-0.000359635	CovTest	Original	New
cg04697482	Prenatal smoking	first	first	0.0123943	0.000119287	0.0254547	0.000236915	0.000235527	CovTest	Original	New
cg04714638	Prenatal smoking	first	first	0.0111148	0.000115741	0.0252007	0.00418889	0.00230247	CovTest	Original	New
cg08888354	Prenatal smoking	first	first	0.0112714	0.000297269	0.0385607	0.00545559	0.0120616	CovTest	Original	New
cg09464194	Prenatal smoking	first	first	0.012354	0.000245028	0.0352526	0.00400238	0.00273713	CovTest	Original	New
cg09772661	Prenatal smoking	first	first	0.0111483	0.000179882	0.0307311	-0.00201759	-0.0030213	CovTest	Original	New
cg10783469	Prenatal smoking	first	first	0.0131915	0.000186667	0.0312349	-0.00450467	-0.00360028	CovTest	Original	New
cg11243391	Prenatal smoking	first	first	0.0119586	6.343e-05	0.0195452	-0.00355073	-0.00186367	CovTest	Original	New
cg11293190	Prenatal smoking	first	first	0.0120954	0.000216274	0.0331912	-0.00508878	-0.00601083	CovTest	Original	New
cg14725151	Prenatal smoking	first	first	0.011447	0.000142161	0.0275442	-0.000374631	-0.000296303	CovTest	Original	New
cg15400652	Prenatal smoking	first	first	0.0108396	0.000135701	0.026946	0.000872083	0.00134613	CovTest	Original	New
cg15473028	Prenatal smoking	recency	recency	0.0127639	0.000410974	0.0447968	NA	NA	CovTest	Original	New
cg17714703	Prenatal smoking	accumulation	accumulation	0.0105125	0.000473972	0.0477489	NA	NA	CovTest	Original	New
cg17773349	Prenatal smoking	first	first	0.0133644	3.31964e-05	0.0146296	-0.000479036	-0.000508151	CovTest	Original	New
cg18380550	Prenatal smoking	first	first	0.0120295	0.000140512	0.027324	-0.000623717	-0.000865359	CovTest	Original	New
cg19586132	Prenatal smoking	first	first	0.0156854	1.30937e-05	0.00954403	-0.000150242	-0.000457067	CovTest	Original	New
cg19698570	Prenatal smoking	first	first	0.0139828	5.70353e-05	0.0187529	0.000339155	-1.78304e-07	CovTest	Original	New
cg19925849	Prenatal smoking	first	first	0.012073	0.000226503	0.033943	0.000736638	-0.00082102	CovTest	Original	New
cg20091384	Prenatal smoking	first	first	0.0125883	0.000111391	0.0247744	-0.00268004	-0.000595397	CovTest	Original	New
cg21278285	Prenatal smoking	first	first	0.0109442	0.00037588	0.0428825	0.000433316	0.00015255	CovTest	Original	New
cg21913888	Prenatal smoking	first	first	0.011455	0.000153521	0.0284545	-0.00332876	-0.00369355	CovTest	Original	New
cg22035959	Prenatal smoking	first	first	0.0131072	8.93747e-05	0.0224813	-0.00358226	-0.00473772	CovTest	Original	New
cg23270359	Prenatal smoking	first	first	0.0145056	3.11134e-05	0.0141662	-0.000963767	-0.000996187	CovTest	Original	New
cg23300543	Prenatal smoking	first	first	0.010271	0.000427739	0.0454509	-0.000484288	-0.000359226	CovTest	Original	New
cg23470272	Prenatal smoking	first	first	0.0131959	0.000137429	0.0270469	0.000112367	-2.45862e-05	CovTest	Original	New
cg25293896	Prenatal smoking	first	first	0.0121672	5.99957e-05	0.0191541	-0.000988567	0.000769217	CovTest	Original	New
cg27191312	Prenatal smoking	accumulation	accumulation	0.014773	4.21637e-05	0.0163406	NA	NA	CovTest	Original	New
cg01278387	Prenatal smoking	first	first	0.0125219	0.000214218	0.0331677	1.90365e-05	-0.000146089	CovTest	Original	New
cg02939767	Prenatal smoking	first	first	0.0122978	0.000118242	0.0253916	-0.0067202	-0.00398681	CovTest	Original	New
cg03111498	Prenatal smoking	first	first	0.0121693	0.000501518	0.0490373	4.69665e-06	-0.00164016	CovTest	Original	New
cg03373518	Prenatal smoking	first	first	0.0116956	0.000412663	0.0448972	-0.000363717	-0.000218139	CovTest	Original	New
cg03380643	Prenatal smoking	first	first	0.0121255	0.000159577	0.0290311	-0.000935068	-0.000699886	CovTest	Original	New
cg09154639	Prenatal smoking	first	first	0.0143396	1.37663e-05	0.00971467	0.000522893	7.85572e-05	CovTest	Original	New
cg11038491	Prenatal smoking	second	second	0.0133237	7.8176e-05	0.0211984	-0.00418709	-0.00408121	CovTest	Original	New
cg11523191	Prenatal smoking	first	first	0.00967298	0.000375483	0.0428825	0.00101192	0.00114989	CovTest	Original	New
cg11542165	Prenatal smoking	first	first	0.0145795	1.99942e-05	0.0115368	0.00357217	0.00263834	CovTest	Original	New
cg12277998	Prenatal smoking	first	first	0.0146871	8.85991e-06	0.00786631	0.000385163	3.24772e-05	CovTest	Original	New
cg12388309	Prenatal smoking	first	first	0.0122113	0.000284838	0.0378744	0.000583753	0.000232633	CovTest	Original	New
cg14373923	Prenatal smoking	first	first	0.0107513	0.000257262	0.0360017	-0.00161848	-0.00089357	CovTest	Original	New
cg15631127	Prenatal smoking	first	first	0.011664	9.9047e-05	0.0234442	-0.00133563	-0.00162613	CovTest	Original	New
cg19292062	Prenatal smoking	first	first	0.0123437	0.000183536	0.0309869	0.00100318	0.000547991	CovTest	Original	New
cg22100563	Prenatal smoking	first	first	0.0110921	0.000320718	0.0398644	-0.00145242	-0.000214917	CovTest	Original	New
cg22643294	Prenatal smoking	first	first	0.0104299	0.000337865	0.0410347	0.00362758	0.00730314	CovTest	Original	New
cg24128806	Prenatal smoking	first	first	0.0108326	0.000144943	0.0277462	-0.00149462	0.00460684	CovTest	Original	New
cg25987077	Prenatal smoking	first	first	0.0101407	0.000337827	0.0410347	0.000373465	2.56414e-05	CovTest	Original	New
cg26278454	Prenatal smoking	first	first	0.00985037	0.000407726	0.0446269	-0.000686212	-0.00467912	CovTest	Original	New
cg27606464	Prenatal smoking	first	first	0.0117302	0.000458209	0.046903	-0.000687175	-0.00045801	CovTest	Original	New
cg02800810	Prenatal smoking	first	first	0.015281	5.10587e-06	0.00626154	-0.00264411	-0.00413206	CovTest	Original	New
cg05000748	Prenatal smoking	first	first	0.0117057	0.000334434	0.0408424	-0.000512165	-0.000275496	CovTest	Original	New
cg14719752	Prenatal smoking	first	first	0.0105287	0.00024614	0.0353325	-0.000187495	-1.36872e-05	CovTest	Original	New
cg00938380	Prenatal smoking	first	first	0.0116303	0.000254286	0.035813	0.000818375	0.00230819	CovTest	Original	New
cg01027808	Prenatal smoking	first	first	0.0134853	8.29137e-05	0.0218694	0.00147437	0.0024838	CovTest	Original	New
cg03389890	Prenatal smoking	first	first	0.00982402	0.000425523	0.0454156	-0.00121975	0.0024528	CovTest	Original	New
cg03597976	Prenatal smoking	first	first	0.0101872	0.000406098	0.0444966	-6.44027e-05	-5.98073e-05	CovTest	Original	New
cg04852989	Prenatal smoking	first	first	0.0123227	0.000474394	0.0477489	0.000227765	3.98057e-06	CovTest	Original	New
cg08382235	Prenatal smoking	recency	recency	0.0119878	0.000301282	0.038794	NA	NA	CovTest	Original	New
cg09465855	Prenatal smoking	second	second	0.0107169	0.000338617	0.0410572	-0.000162039	-0.000245715	CovTest	Original	New
cg12552771	Prenatal smoking	first	first	0.0118472	0.000132556	0.0266298	-0.00130063	-0.00227904	CovTest	Original	New
cg14679444	Prenatal smoking	first	first	0.0110189	0.00027298	0.0371813	-0.00138737	-0.000449536	CovTest	Original	New
cg16831055	Prenatal smoking	first	first	0.0118859	0.000245665	0.0353104	0.00203892	0.00123889	CovTest	Original	New
cg19621271	Prenatal smoking	first	first	0.00922038	0.000502259	0.0490512	0.00112189	0.00310218	CovTest	Original	New
cg25666403	Prenatal smoking	first	first	0.0117017	0.000321419	0.0399173	-2.03195e-06	-0.000113384	CovTest	Original	New
cg25937494	Prenatal smoking	second	second	0.0128447	0.000394135	0.0439271	0.000246338	-4.35036e-05	CovTest	Original	New
cg27653384	Prenatal smoking	first	first	0.0117888	9.04088e-05	0.0225258	-6.91388e-05	-0.000882085	CovTest	Original	New
cg00165121	Prenatal smoking	first	first	0.0112324	0.000171612	0.0300187	0.00151516	0.00422093	CovTest	Original	New
cg00207921	Prenatal smoking	first	first	0.0116597	0.000270047	0.0369287	0.00844529	-0.000574914	CovTest	Original	New
cg00215182	Prenatal smoking	first	first	0.0115963	0.000255693	0.0358963	-0.00483916	0.00325241	CovTest	Original	New
cg00301726	Prenatal smoking	first	first	0.0134609	0.000106964	0.0244145	-0.00443841	0.00311479	CovTest	Original	New
cg00456651	Prenatal smoking	first	first	0.00944138	0.000471564	0.0476277	-0.0014957	-0.00402459	CovTest	Original	New
cg00492341	Prenatal smoking	first	first	0.0156682	4.27272e-06	0.00583257	-0.0011104	0.000485142	CovTest	Original	New
cg00525833	Prenatal smoking	accumulation	accumulation	0.0152624	3.26896e-05	0.0145819	NA	NA	CovTest	Original	New
cg00756887	Prenatal smoking	first	first	0.0103468	0.000200473	0.0322043	0.0013447	0.0045047	CovTest	Original	New
cg00760014	Prenatal smoking	first	first	0.0105676	0.000214921	0.0331797	0.0026425	0.00335982	CovTest	Original	New
cg00821310	Prenatal smoking	first	first	0.00978056	0.000390214	0.0437581	-0.00357143	-0.000341184	CovTest	Original	New
cg01128109	Prenatal smoking	first	first	0.0184493	3.00756e-06	0.00472892	-0.00444595	0.000705992	CovTest	Original	New
cg01336162	Prenatal smoking	first	first	0.00966086	0.000394787	0.0439635	0.00627816	0.00282403	CovTest	Original	New
cg01472176	Prenatal smoking	first	first	0.0154107	3.54995e-06	0.00520963	0.00190162	0.00319074	CovTest	Original	New
cg01514075	Prenatal smoking	first	first	0.0128562	4.70907e-05	0.0171196	-0.005771	-0.00158175	CovTest	Original	New
cg01530981	Prenatal smoking	first	first	0.0114914	0.000152108	0.028345	-0.00258887	-0.00946218	CovTest	Original	New
cg02012159	Prenatal smoking	first	first	0.0153352	4.66678e-06	0.00600756	-0.00962653	-0.00573884	CovTest	Original	New
cg02069772	Prenatal smoking	first	first	0.0144003	1.24342e-05	0.00931342	-0.00375673	0.000913569	CovTest	Original	New
cg02288964	Prenatal smoking	first	first	0.0108683	0.000282774	0.0377252	-0.0147165	-0.00905007	CovTest	Original	New
cg02672592	Prenatal smoking	first	first	0.0118855	5.94875e-05	0.019061	0.00173307	0.0058549	CovTest	Original	New
cg02858267	Prenatal smoking	first	first	0.0116806	9.55635e-05	0.0230787	0.0148482	0.00524533	CovTest	Original	New
cg02900760	Prenatal smoking	first	first	0.0119447	0.000221464	0.0335632	0.00144334	0.00417365	CovTest	Original	New
cg02906823	Prenatal smoking	first	first	0.0135577	2.31086e-05	0.0122	0.0058668	0.00434505	CovTest	Original	New
cg02951134	Prenatal smoking	first	first	0.0112901	0.000198474	0.0321098	0.0109285	0.00555785	CovTest	Original	New
cg02989257	Prenatal smoking	first	first	0.0104044	0.000509873	0.0495583	-0.00419714	0.00382523	CovTest	Original	New
cg03036514	Prenatal smoking	first	first	0.00960067	0.00040391	0.0444875	0.000281321	-0.000377291	CovTest	Original	New
cg03036777	Prenatal smoking	first	first	0.014097	4.03188e-05	0.0159658	0.00492282	0.00699298	CovTest	Original	New
cg03140624	Prenatal smoking	first	first	0.0220417	2.77022e-08	0.000554367	-0.00521369	0.000670525	CovTest	Original	New
cg03223467	Prenatal smoking	first	first	0.0116868	0.000273213	0.037182	-0.000156001	0.00144666	CovTest	Original	New
cg03323953	Prenatal smoking	first	first	0.01299	0.000356797	0.0420346	0.00352176	0.00243622	CovTest	Original	New
cg03438216	Prenatal smoking	first	first	0.0147293	8.29003e-06	0.00760829	0.00418725	0.00430712	CovTest	Original	New
cg03568718	Prenatal smoking	second	second	0.0139829	5.57418e-05	0.0186197	-0.00170067	0.00300235	CovTest	Original	New
cg03604774	Prenatal smoking	first	first	0.0152847	6.21002e-06	0.006734	0.0136248	0.00354295	CovTest	Original	New
cg03942855	Prenatal smoking	first	first	0.0100626	0.000312843	0.039442	-0.00164702	-0.0039227	CovTest	Original	New
cg04005555	Prenatal smoking	first	first	0.0185464	9.81831e-07	0.00288938	-0.0013511	0.000981175	CovTest	Original	New
cg04026747	Prenatal smoking	first	first	0.0108675	0.000205871	0.0326029	-0.000854699	-8.13455e-05	CovTest	Original	New
cg04086443	Prenatal smoking	first	first	0.0112492	0.000379793	0.0430799	-0.000531075	-0.00448795	CovTest	Original	New
cg04126810	Prenatal smoking	second	second	0.0117245	0.000295149	0.038462	0.000138012	-0.00016741	CovTest	Original	New
cg04138976	Prenatal smoking	first	first	0.0125654	8.49065e-05	0.0220531	-0.000217644	-0.000311471	CovTest	Original	New
cg04139043	Prenatal smoking	first	first	0.0127485	0.000126926	0.0261611	-0.011221	-0.00626591	CovTest	Original	New
cg04142750	Prenatal smoking	first	first	0.00944556	0.000499759	0.04897	-0.00119682	0.00106416	CovTest	Original	New
cg04167126	Prenatal smoking	first	first	0.010771	0.000337158	0.0410157	-0.000615584	0.00032105	CovTest	Original	New
cg04195831	Prenatal smoking	first	first	0.0137759	1.36909e-05	0.00971467	-0.0164724	-0.00601198	CovTest	Original	New
cg04221650	Prenatal smoking	first	first	0.0136724	0.000200905	0.0322104	-0.00467599	-0.00181358	CovTest	Original	New
cg04277893	Prenatal smoking	first	first	0.0124242	9.03783e-05	0.0225258	0.00637904	0.00339241	CovTest	Original	New
cg04283926	Prenatal smoking	first	first	0.0148943	1.4103e-05	0.00976605	0.00720705	0.00468666	CovTest	Original	New
cg04296837	Prenatal smoking	first	first	0.0110926	0.00011663	0.0252817	-0.013508	-0.00200482	CovTest	Original	New
cg04548815	Prenatal smoking	first	first	0.0135336	4.22667e-05	0.016366	-0.000450111	0.00265206	CovTest	Original	New
cg04568981	Prenatal smoking	first	first	0.00999943	0.000418969	0.045154	0.000548421	0.000824489	CovTest	Original	New
cg04673462	Prenatal smoking	first	first	0.0123102	5.12196e-05	0.0177982	-0.00468669	-0.00541408	CovTest	Original	New
cg04898695	Prenatal smoking	first	first	0.00956692	0.000408657	0.0446826	0.000235649	-0.00165682	CovTest	Original	New
cg04914814	Prenatal smoking	first	first	0.0117063	0.000113417	0.0249415	0.00879433	0.00110751	CovTest	Original	New
cg04918708	Prenatal smoking	first	first	0.0114404	0.000355571	0.0419348	0.00358287	0.00574535	CovTest	Original	New
cg04988794	Prenatal smoking	first	first	0.0113303	0.000242244	0.0350913	0.00284811	0.00751427	CovTest	Original	New
cg05005077	Prenatal smoking	first	first	0.0133314	9.22786e-05	0.0226334	0.00837007	0.00510158	CovTest	Original	New
cg05005791	Prenatal smoking	first	first	0.0122477	5.74151e-05	0.0187797	-0.00485336	0.000999955	CovTest	Original	New
cg05036120	Prenatal smoking	first	first	0.0102046	0.000439994	0.0460777	0.00220011	0.00564024	CovTest	Original	New
cg05229742	Prenatal smoking	accumulation	accumulation	0.0124963	0.00012383	0.0258807	NA	NA	CovTest	Original	New
cg05248781	Prenatal smoking	first	first	0.0147323	2.44589e-05	0.0125797	0.0019085	0.00734555	CovTest	Original	New
cg05383442	Prenatal smoking	first	first	0.0137167	8.19516e-05	0.0217348	0.00438529	-0.00176458	CovTest	Original	New
cg05658807	Prenatal smoking	first	first	0.0107283	0.000471504	0.0476277	0.00677822	0.00510213	CovTest	Original	New
cg05809481	Prenatal smoking	first	first	0.0121052	0.000263932	0.0364713	-0.0143921	-0.00468976	CovTest	Original	New
cg05934125	Prenatal smoking	first	first	0.0151176	1.60719e-05	0.0104826	0.00866034	0.00626468	CovTest	Original	New
cg06092502	Prenatal smoking	first	first	0.0100843	0.000332854	0.0407512	0.0104706	0.0137176	CovTest	Original	New
cg06115810	Prenatal smoking	second	second	0.0152091	1.88718e-05	0.0114147	0.0015999	0.00173976	CovTest	Original	New
cg06119874	Prenatal smoking	first	first	0.0117987	0.000173822	0.0302317	0.015854	0.00973184	CovTest	Original	New
cg06154531	Prenatal smoking	first	first	0.0119405	0.000159455	0.0290311	0.00115441	0.00439126	CovTest	Original	New
cg06178315	Prenatal smoking	first	first	0.014274	6.72425e-05	0.0199757	-0.0120814	-0.0119069	CovTest	Original	New
cg06187528	Prenatal smoking	first	first	0.0127403	0.000319329	0.0397812	0.000403851	0.00758933	CovTest	Original	New
cg06346954	Prenatal smoking	first	first	0.0122312	8.37508e-05	0.0219999	0.0019181	0.00492273	CovTest	Original	New
cg06357908	Prenatal smoking	first	first	0.0131021	9.53476e-05	0.0230519	0.00594951	0.00552247	CovTest	Original	New
cg06441150	Prenatal smoking	first	first	0.012401	8.96111e-05	0.0224813	0.0245978	0.0205571	CovTest	Original	New
cg06501070	Prenatal smoking	first	first	0.0164249	1.7796e-05	0.0111106	0.00616939	0.00595034	CovTest	Original	New
cg06545477	Prenatal smoking	first	first	0.0107159	0.000292566	0.0383004	0.0385979	0.0107741	CovTest	Original	New
cg06646728	Prenatal smoking	first	first	0.0154541	1.3744e-05	0.00971467	0.00348925	0.00352453	CovTest	Original	New
cg06712674	Prenatal smoking	first	first	0.0123165	7.37058e-05	0.0206948	-0.0065018	-0.00361841	CovTest	Original	New
cg06744003	Prenatal smoking	first	first	0.0141755	5.59559e-05	0.0186629	0.00217089	0.000759655	CovTest	Original	New
cg06839953	Prenatal smoking	first	first	0.0101232	0.000285184	0.0378935	-0.000389345	-0.000881718	CovTest	Original	New
cg06883089	Prenatal smoking	first	first	0.0118305	0.000104085	0.0241094	-0.00384114	0.00398459	CovTest	Original	New
cg06883373	Prenatal smoking	first	first	0.0111875	0.000258473	0.0360451	0.000609196	0.0016408	CovTest	Original	New
cg06887407	Prenatal smoking	first	first	0.0121815	0.000126113	0.0261159	0.0080792	0.00793775	CovTest	Original	New
cg06933796	Prenatal smoking	first	first	0.0187108	1.52435e-06	0.00352587	0.00118688	0.00382575	CovTest	Original	New
cg06948089	Prenatal smoking	first	first	0.0132294	2.08075e-05	0.01169	0.0100916	0.00617806	CovTest	Original	New
cg06972019	Prenatal smoking	first	first	0.0178284	5.83063e-07	0.00244745	-0.0043524	-0.0128337	CovTest	Original	New
cg07177756	Prenatal smoking	first	first	0.0120093	6.25311e-05	0.0194557	-0.00396557	-0.0133871	CovTest	Original	New
cg07178864	Prenatal smoking	first	first	0.0118043	0.00017423	0.0302349	-0.00390255	-0.000980869	CovTest	Original	New
cg07236127	Prenatal smoking	first	first	0.0107203	0.000187255	0.0312629	-0.00140404	0.00327099	CovTest	Original	New
cg07314983	Prenatal smoking	first	first	0.00972772	0.000423209	0.045338	0.00112667	0.00174079	CovTest	Original	New
cg07322117	Prenatal smoking	first	first	0.0167133	2.99937e-06	0.00472892	-0.00167031	0.00210744	CovTest	Original	New
cg07349054	Prenatal smoking	first	first	0.0120203	0.000107304	0.0244344	-0.000156789	-0.000223077	CovTest	Original	New
cg07559336	Prenatal smoking	first	first	0.0146781	8.65121e-06	0.00783695	0.00963364	0.00696116	CovTest	Original	New
cg07699939	Prenatal smoking	first	first	0.0116218	0.000203573	0.0324691	0.00796139	0.00514747	CovTest	Original	New
cg07800959	Prenatal smoking	first	first	0.0109385	0.000238525	0.034853	-0.00214233	0.000457373	CovTest	Original	New
cg07874520	Prenatal smoking	first	first	0.016653	1.52938e-05	0.010171	0.00398824	0.00275077	CovTest	Original	New
cg08029603	Prenatal smoking	first	first	0.0128303	0.000130915	0.0264873	0.0135893	0.00966108	CovTest	Original	New
cg08202226	Prenatal smoking	first	first	0.00936081	0.00048769	0.0483579	0.00171999	0.000462279	CovTest	Original	New
cg08544331	Prenatal smoking	first	first	0.0130391	3.52485e-05	0.0150372	-0.000882514	0.000333325	CovTest	Original	New
cg08606911	Prenatal smoking	first	first	0.0107644	0.000355209	0.0419033	-0.000728075	-0.00272144	CovTest	Original	New
cg08648882	Prenatal smoking	first	first	0.0169695	2.39758e-06	0.00432603	0.00390403	0.0074926	CovTest	Original	New
cg08670691	Prenatal smoking	first	first	0.0103984	0.000339595	0.0411182	0.000997203	0.00116011	CovTest	Original	New
cg08729059	Prenatal smoking	second	second	0.0119492	0.000143237	0.0276099	0.00508262	0.00406598	CovTest	Original	New
cg08736522	Prenatal smoking	first	first	0.0110036	0.000356799	0.0420346	0.00208163	0.0074465	CovTest	Original	New
cg08785274	Prenatal smoking	first	first	0.00969054	0.000387396	0.0435276	-0.000563115	-0.0025335	CovTest	Original	New
cg08847140	Prenatal smoking	first	first	0.0111779	0.000190707	0.0315758	0.00333054	0.0060837	CovTest	Original	New
cg08868915	Prenatal smoking	first	first	0.0109616	0.000183488	0.0309869	-0.00669437	-0.0029576	CovTest	Original	New
cg08970446	Prenatal smoking	first	first	0.012451	5.69246e-05	0.0187529	-0.0106701	-0.00728057	CovTest	Original	New
cg08979126	Prenatal smoking	first	first	0.0128384	3.43576e-05	0.0148015	0.00439212	0.00528802	CovTest	Original	New
cg09025625	Prenatal smoking	first	first	0.00964274	0.000352462	0.0417663	-0.00241799	-0.00219075	CovTest	Original	New
cg09059178	Prenatal smoking	first	first	0.0125033	0.000127904	0.0261778	8.09683e-05	-0.000262398	CovTest	Original	New
cg09149784	Prenatal smoking	first	first	0.0125543	3.78478e-05	0.0155622	0.0027071	0.00539914	CovTest	Original	New
cg09315264	Prenatal smoking	first	first	0.00942419	0.000476349	0.0478166	-0.00674114	-0.00455895	CovTest	Original	New
cg09674469	Prenatal smoking	first	first	0.0134362	5.39727e-05	0.0182942	0.00472208	0.00172695	CovTest	Original	New
cg09684336	Prenatal smoking	first	first	0.00960913	0.000371755	0.0427778	-0.000928876	0.000319409	CovTest	Original	New
cg09793809	Prenatal smoking	first	first	0.0114984	0.000112281	0.0248405	-0.0110605	-0.00327216	CovTest	Original	New
cg09855706	Prenatal smoking	first	first	0.0144432	4.13021e-05	0.0161485	4.66603e-05	-0.00222804	CovTest	Original	New
cg10119342	Prenatal smoking	first	first	0.0129067	2.50286e-05	0.0127683	-0.0193497	-0.0103907	CovTest	Original	New
cg10176514	Prenatal smoking	first	first	0.0128292	9.83655e-05	0.0233773	-0.00999954	-0.00523925	CovTest	Original	New
cg10433625	Prenatal smoking	first	first	0.00963166	0.000462645	0.0471488	0.00506703	0.00818732	CovTest	Original	New
cg10453343	Prenatal smoking	first	first	0.013025	0.00027991	0.037548	0.00289356	0.00797774	CovTest	Original	New
cg10558228	Prenatal smoking	first	first	0.0122086	4.86773e-05	0.0174516	0.000560338	0.00112656	CovTest	Original	New
cg10573505	Prenatal smoking	first	first	0.0156872	5.43043e-06	0.0063971	0.00680017	0.00351689	CovTest	Original	New
cg10573643	Prenatal smoking	first	first	0.0108043	0.00015652	0.0287481	0.000554435	0.00284786	CovTest	Original	New
cg10634950	Prenatal smoking	first	first	0.0104873	0.000324955	0.0401836	0.00602897	0.00272015	CovTest	Original	New
cg10653240	Prenatal smoking	first	first	0.0117907	0.000154344	0.0285149	-0.002051	-0.00863274	CovTest	Original	New
cg10722410	Prenatal smoking	accumulation	accumulation	0.00979373	0.000447968	0.0463552	NA	NA	CovTest	Original	New
cg10886334	Prenatal smoking	first	first	0.0102513	0.000263819	0.0364673	-0.000509438	0.00165749	CovTest	Original	New
cg11070191	Prenatal smoking	first	first	0.0111754	0.000251109	0.0356506	0.000127907	0.00285085	CovTest	Original	New
cg11078875	Prenatal smoking	first	first	0.0168599	1.3583e-05	0.00971467	-0.0135136	-0.00841065	CovTest	Original	New
cg11145461	Prenatal smoking	first	first	0.0159272	1.13218e-05	0.00888636	0.0059857	0.00368333	CovTest	Original	New
cg11197916	Prenatal smoking	first	first	0.00973384	0.000450968	0.046486	-6.30187e-05	-0.000957977	CovTest	Original	New
cg11253737	Prenatal smoking	first	first	0.0133672	6.22811e-05	0.0194328	-0.00965141	-0.00497364	CovTest	Original	New
cg11336061	Prenatal smoking	first	first	0.0160654	1.40887e-05	0.00976605	-0.0129517	-0.00484995	CovTest	Original	New
cg11395388	Prenatal smoking	first	first	0.0106627	0.00015923	0.0290311	0.000284884	-0.000126391	CovTest	Original	New
cg11415739	Prenatal smoking	first	first	0.0096028	0.000405942	0.0444906	0.00135148	-0.000300711	CovTest	Original	New
cg11523134	Prenatal smoking	first	first	0.0141712	8.71714e-06	0.00785706	0.00303097	0.00359933	CovTest	Original	New
cg11577454	Prenatal smoking	first	first	0.0120064	0.000178681	0.030621	-0.00084957	0.00319227	CovTest	Original	New
[truncated: 3,069 more rows]

## Sheet: S5. New data, updated analysis
Table S5. CpGs associated with childhood adversity or prenatal smoking in the SLCMA of new data in the updated analysis
CpG	Adversity	Model	Timing	R2	P.value	FDR	%DNAm change (old)	%DNAm change (new)	Method	Covariates	Data
cg20369299	Physical/sexual abuse	57m	early	0.0399362	2.1204e-07	0.0466761	-0.0825441	-0.0746155	sI	Updated	New
cg13817046	Physical/sexual abuse	57m	early	0.044172	5.07357e-08	0.0223367	-0.0620294	-0.0611737	sI	Updated	New
cg12023170	Carregiver physical/emotional abuse	6y	middle	0.0520334	1.24545e-09	0.000548317	0.0119531	0.0297873	sI	Updated	New
cg01407460	Family instability	57m	early	0.0448576	3.09828e-08	0.0068202	-0.00248197	-0.00394375	sI	Updated	New
cg01587190	Family instability	57m	early	0.0354978	1.108e-06	0.0252683	0.00232671	0.00658225	sI	Updated	New
cg06770536	Family instability	69m	middle	0.0323796	4.30616e-06	0.0451385	-0.0360766	-0.0456287	sI	Updated	New
cg22346081	Family instability	57m	early	0.0324149	3.47503e-06	0.0392435	-0.0130282	-0.0160714	sI	Updated	New
cg14948379	Family instability	57m	early	0.0384776	4.09546e-07	0.0206901	-0.0260431	-0.0251667	sI	Updated	New
cg17134302	Family instability	57m	early	0.0333674	2.91142e-06	0.0392435	-0.0144867	-0.0148195	sI	Updated	New
cg22060367	Family instability	57m	early	0.0406007	1.84349e-07	0.0162322	-0.0163124	-0.0178976	sI	Updated	New
cg01100868	Family instability	57m	early	0.0345342	2.06817e-06	0.0337232	-0.0134905	-0.0109666	sI	Updated	New
cg16338178	Family instability	57m	early	0.0322258	3.22361e-06	0.0392435	-0.014675	-0.0194026	sI	Updated	New
cg27639644	Family instability	57m	early	0.0375103	5.63946e-07	0.0206901	-0.0271299	-0.0283371	sI	Updated	New
cg00943585	Family instability	57m	early	0.0328066	3.47637e-06	0.0392435	-0.0289795	-0.0430459	sI	Updated	New
cg27061903	Family instability	57m	early	0.033856	2.23161e-06	0.0350887	0.00313938	0.012278	sI	Updated	New
cg01023798	Family instability	57m	early	0.0352192	1.53867e-06	0.0282254	-0.0223693	-0.0211798	sI	Updated	New
cg02886132	Family instability	57m	early	0.03611	1.18084e-06	0.0252683	-0.0222065	-0.0174525	sI	Updated	New
cg10571837	Family instability	57m	early	0.038029	5.3505e-07	0.0206901	-0.00982145	-0.0130888	sI	Updated	New
cg17719337	Family instability	69m	middle	0.0333342	2.48384e-06	0.036451	0.003912	0.0082611	sI	Updated	New
cg19569074	Family instability	81m	middle	0.032693	3.02633e-06	0.0392435	-0.082233	-0.0568295	sI	Updated	New
cg23184756	Family instability	57m	early	0.0380654	4.89196e-07	0.0206901	-0.0279185	-0.024215	sI	Updated	New
cg01654242	Family instability	57m	early	0.0349546	1.95241e-06	0.03306	-0.076851	-0.0453269	sI	Updated	New
cg16231917	Family instability	57m	early	0.0329049	4.09233e-06	0.0439433	0.0156123	0.0582377	sI	Updated	New
cg27457457	Family instability	57m	early	0.0451793	2.76714e-08	0.0068202	-0.0400653	-0.0593882	sI	Updated	New
cg13876553	Family instability	57m	early	0.0325686	3.87563e-06	0.0426568	-0.0247196	-0.0336079	sI	Updated	New
cg21172807	Family instability	57m	early	0.0326987	3.14132e-06	0.0392435	0.002517	0.0188026	sI	Updated	New
cg05886789	Family instability	57m	early	0.0398	2.57374e-07	0.0188851	-0.0203041	-0.0232361	sI	Updated	New
cg07206497	Family instability	57m	early	0.0356542	1.16461e-06	0.0252683	-0.014721	-0.0174593	sI	Updated	New
cg08971940	Family instability	57m	early	0.0345563	1.73055e-06	0.0304755	-0.0308003	-0.0391406	sI	Updated	New
cg01504589	Family instability	57m	early	0.0361405	8.53118e-07	0.0252683	-0.0254172	-0.0332629	sI	Updated	New
cg22011436	Family instability	57m	early	0.0358936	1.20529e-06	0.0252683	-0.0245513	-0.022414	sI	Updated	New
cg26997966	Family instability	57m	early	0.038684	3.13997e-07	0.0197485	-0.0229954	-0.0215987	sI	Updated	New
cg00967695	Family instability	57m	early	0.035023	1.29913e-06	0.0255599	-0.0196519	-0.023572	sI	Updated	New
cg01267076	Family instability	57m	early	0.0353967	1.33531e-06	0.0255599	-0.0163429	-0.015693	sI	Updated	New
cg10940545	Family instability	81m	middle	0.0325525	3.47395e-06	0.0392435	-0.0514821	-0.053588	sI	Updated	New
cg13706680	Family instability	57m	early	0.0431798	7.98438e-08	0.00878795	-0.0203413	-0.0188449	sI	Updated	New
cg14637285	Family instability	57m	early	0.0334975	2.82095e-06	0.0392435	-0.0137788	-0.0202145	sI	Updated	New
cg04079399	Family instability	30m	very early	0.0431638	6.15e-08	0.00878795	-0.0165094	-0.0171344	sI	Updated	New
cg12188526	Family instability	57m	early	0.0323963	3.23823e-06	0.0392435	-0.0109876	-0.0137834	sI	Updated	New
cg01841772	Family instability	57m	early	0.0320546	4.51858e-06	0.0462636	-0.0327663	-0.0407911	sI	Updated	New
cg09305491	Family instability	57m	early	0.0354475	1.01922e-06	0.0252683	-0.00787123	-0.0134045	sI	Updated	New
cg27567416	Family instability	57m	early	0.0357401	1.11844e-06	0.0252683	-0.0140665	-0.0146302	sI	Updated	New
cg05353659	Family instability	57m	early	0.0357476	1.02074e-06	0.0252683	-0.00909751	-0.0139487	sI	Updated	New
cg11438065	Family instability	57m	early	0.0379972	5.06156e-07	0.0206901	-0.00879462	-0.0124071	sI	Updated	New
cg14401897	Family instability	57m	early	0.0337684	2.34309e-06	0.0355711	-0.0140207	-0.0356425	sI	Updated	New
cg26848593	Family instability	69m	middle	0.0347707	1.10047e-06	0.0252683	0.00168421	0.00412725	sI	Updated	New
cg14179389	Prenatal smoking	first	first	0.0404432	2.11351e-09	0.000310163	-0.0567443	-0.0562321	sI	Updated	New
cg20457732	Prenatal smoking	recency	recency	0.0308726	4.61875e-07	0.0228096	NA	NA	sI	Updated	New
cg22132788	Prenatal smoking	accumulation	accumulation	0.0832897	0	0	NA	NA	sI	Updated	New
cg19089201	Prenatal smoking	second	second	0.0353235	6.28501e-08	0.00553404	0.0489483	0.0607344	sI	Updated	New
cg00213123	Prenatal smoking	third	third	0.0294746	5.73389e-07	0.0252438	0.0204883	0.0225188	sI	Updated	New
cg22549041	Prenatal smoking	first	first	0.0287084	1.09527e-06	0.0370923	0.0532718	0.0659296	sI	Updated	New
cg01952185	Prenatal smoking	second	second	0.0329621	8.66543e-08	0.00635836	0.0367903	0.032391	sI	Updated	New
cg04180046	Prenatal smoking	second	second	0.0737863	0	0	0.0290922	0.0786688	sI	Updated	New
cg11207515	Prenatal smoking	recency	recency	0.0289863	8.879e-07	0.0325754	NA	NA	sI	Updated	New
cg11813497	Prenatal smoking	first	first	0.0289893	4.45982e-07	0.0228096	0.0368636	0.026758	sI	Updated	New
cg11329129	Prenatal smoking	second	second	0.0289447	7.56712e-07	0.0302861	-0.0065551	-0.0195869	sI	Updated	New
cg11924019	Prenatal smoking	recency	recency	0.0380479	1.44497e-08	0.00159039	NA	NA	sI	Updated	New
cg09459868	Prenatal smoking	second	second	0.0293889	4.66289e-07	0.0228096	0.0117278	0.0166002	sI	Updated	New

## Sheet: S6. Overlapping CpGs
Table S6. CpGs overlapping across all three SCLMA analyses of childhood adversity
						Old data, standard analysis			New data, standard analysis			New data, updated analysis
CpG	Adversity	Model	Timing	%difference (old)	%difference (new)	R2	P.value	FDR	R2	P.value	FDR	R2	P.value	FDR	UCSC_REFGENE_NAME	UCSC_REFGENE_GROUP
cg20369299	Abuse	57m	early	-0.0825441	-0.0746155	0.0217353	7.03071e-06	0.0496649	0.0358087	1.68405e-09	0.000741416	0.0399362	2.1204e-07	0.0466761		Intergenic
cg12023170	Parental cruelty	6y	middle	0.0119531	0.0297873	0.0391211	3.22037e-10	0.000141779	0.0469463	3.92131e-13	1.72638e-07	0.0520334	1.24545e-09	0.000548317	TCEA3	TSS1500
cg17719337	Family instability	69m	middle	0.003912	0.0082611	0.0245032	2.66517e-06	0.0469343	0.030432	1.89005e-08	0.000924563	0.0333342	2.48384e-06	0.036451		Intergenic
*bolded replicated in the new dataset with selective inference, without the use of the Frisch-Waugh-Lovell theorem to improve power.

## Sheet: S7. EWAS results
Table S7. CpGs associated with childhood adversity or prenatal smoking in the standard EWAS of old or new data
CpG	logFC	Average DNAm	t	P.Value	FDR	B	Adversity	Data version	Delta beta
cg02431672	-0.00450827	0.0908484	-5.49229	5.528e-08	0.0243374	5.75236	abuse	old	-0.00413505
cg04180046	0.0346247	0.169987	9.27868	1.4631e-19	2.14713e-14	32.0588	smoking	old	0.0328675
cg00213123	0.0255914	0.201634	6.44239	1.99322e-10	1.46255e-05	11.3334	smoking	old	0.0231054
cg05549655	0.0106369	0.083075	7.81336	1.68648e-14	1.85621e-09	20.5452	smoking	old	0.0108624
cg05575921	-0.019115	0.788083	-4.93462	9.70955e-07	0.0224984	3.07545	smoking	old	-0.0197558
cg12803068	0.172254	0.645533	10.2653	2.36209e-23	1.03993e-17	40.7173	smoking	old	0.165068
cg11924019	0.0126166	0.146017	6.40882	2.4595e-10	1.54687e-05	11.1348	smoking	old	0.0124737
cg13570656	0.0555462	0.301659	5.70271	1.64053e-08	0.000656597	7.03649	smoking	old	0.0582888
cg15507334	0.0531877	0.43868	5.64236	2.30302e-08	0.000844932	6.70661	smoking	old	0.0544501
cg12101586	0.0483218	0.346296	5.6205	2.60203e-08	0.000881201	6.58795	smoking	old	0.0481813
cg11207515	-0.0457738	0.22987	-5.55278	3.78818e-08	0.00113585	6.22298	smoking	old	-0.044295
cg14179389	-0.0457547	0.240979	-5.54891	3.86996e-08	0.00113585	6.20224	smoking	old	-0.052039
cg11902777	-0.00410121	0.0299521	-4.95512	8.76631e-07	0.0214413	3.18137	smoking	old	-0.00415136
cg11367973	-0.0314167	0.330176	-4.82556	1.66204e-06	0.0341341	2.56492	smoking	old	-0.0266879
cg14157435	-0.0633176	0.544132	-4.78556	2.01883e-06	0.0370335	2.37775	smoking	old	-0.0633236
cg15016771	0.00891502	0.0961316	4.73073	2.62961e-06	0.043437	2.12354	smoking	old	0.0102443
cg14522767	-0.0309878	0.38439	-4.72803	2.6639e-06	0.043437	2.11109	smoking	old	-0.0312924
cg19089201	0.0554346	0.791711	7.63182	6.36989e-14	5.60877e-09	19.2459	smoking	old	0.0531718
cg17852385	0.0115895	0.122882	6.07164	1.92705e-09	0.00010605	9.12574	smoking	old	0.0116839
cg20457732	0.0530658	0.249429	4.92006	1.04381e-06	0.0229773	3.01554	smoking	old	0.0575556
cg21505886	-0.0157442	0.273257	-4.82024	1.70571e-06	0.0341341	2.54244	smoking	old	-0.0145366
cg22132788	0.0876783	0.802759	9.8592	9.33177e-22	2.05419e-16	37.0311	smoking	old	0.0857124
cg22549041	0.061816	0.268386	6.01151	2.75384e-09	0.000134711	8.73331	smoking	old	0.0636541
cg25949550	-0.00638663	0.0612391	-5.81727	8.543e-09	0.000376112	7.62991	smoking	old	-0.00658714
cg26516004	0.0142873	0.934931	5.27132	1.72925e-07	0.00475822	4.70857	smoking	old	0.0134227
cg23916896	-0.00813733	0.101572	-5.12038	3.7942e-07	0.00982601	3.9483	smoking	old	-0.00849642
cg26070889	-0.0112035	0.927501	-4.79842	1.89683e-06	0.0363083	2.39601	smoking	old	-0.0112656
cg22089736	-0.0100386	0.952285	-4.75104	2.38517e-06	0.0420035	2.17563	smoking	old	-0.0087767
cg22132788	0.0834118	0.851503	9.38248	6.03338e-20	8.85413e-15	32.1943	smoking	new	0.0796225
cg13570656	0.0636605	0.267764	5.76708	1.13865e-08	0.000626623	6.63983	smoking	new	0.0665548
cg14179389	-0.0478259	0.16931	-5.64093	2.32168e-08	0.00102214	5.94667	smoking	new	-0.0521568
cg12101586	0.0571464	0.309928	5.56825	3.47829e-08	0.00127612	5.55374	smoking	new	0.0580166
cg20457732	0.066892	0.217842	5.51791	4.58956e-08	0.0015543	5.28442	smoking	new	0.0711115
cg14157435	-0.0858582	0.532716	-4.95628	8.71593e-07	0.0213181	2.43434	smoking	new	-0.0834472
cg05575921	-0.0189434	0.853374	-4.79734	1.90686e-06	0.0400676	1.67997	smoking	new	-0.020163
cg19089201	0.069787	0.811256	7.65719	5.2992e-14	5.83252e-09	19.1713	smoking	new	0.0660493
cg22549041	0.0722877	0.214093	5.61552	2.67544e-08	0.0010708	6.30663	smoking	new	0.0744328
cg00213123	0.0237775	0.168964	5.16313	3.04346e-07	0.00788179	3.94874	smoking	new	0.0219476
cg04180046	0.0936207	0.409344	9.51741	1.88089e-20	4.14037e-15	34.6648	smoking	new	0.088786
cg23916896	-0.0270063	0.238729	-5.35573	1.10451e-07	0.00347333	5.76447	smoking	new	-0.0267593
cg11207515	-0.0487266	0.383861	-5.18502	2.71629e-07	0.00747417	4.8934	smoking	new	-0.0469683
cg11625488	-0.0318201	0.302739	-4.79684	1.9112e-06	0.0400676	3.01143	smoking	new	-0.031502
cg11902777	-0.00895097	0.0418907	-4.76872	2.18998e-06	0.0438252	2.88048	smoking	new	-0.00825056
cg12803068	0.127018	0.689761	10.1531	6.58461e-23	2.89892e-17	40.2953	smoking	new	0.121457
cg15507334	0.0387297	0.497122	7.09546	2.76857e-12	2.03147e-07	16.1394	smoking	new	0.0389345
cg25464840	0.0287581	0.63193	5.32192	1.32262e-07	0.00388196	5.62028	smoking	new	0.0289702
cg11367973	-0.0349013	0.481226	-4.85413	1.44499e-06	0.0334825	3.31102	smoking	new	-0.029502
cg11813497	0.0256087	0.733432	4.7337	2.5921e-06	0.0496169	2.74894	smoking	new	0.0259146
cg05549655	0.0346459	0.16	7.22555	1.1328e-12	9.97447e-08	16.9558	smoking	new	0.0363296
cg11924019	0.0402593	0.351386	6.35501	3.43691e-10	2.16161e-05	11.3536	smoking	new	0.0394423
cg17852385	0.0442842	0.276497	5.64501	2.26865e-08	0.00102214	7.26886	smoking	new	0.0449369
